1 **TITLE:** *Common genetic variation impacts stress response in the brain*

2

3 **AUTHORS:**

4 Carina Seah<sup>1,2</sup>, Rebecca Signer<sup>1,2\*</sup>, Michael Deans<sup>2\*</sup>, Heather Bader<sup>3\*</sup>, Tom Rusielewicz<sup>4\*</sup>,  
5 Emily M. Hicks<sup>2,5</sup>, Hannah Young<sup>1,2</sup>, Alanna Cote<sup>1,2</sup>, Kayla Townsley<sup>2,5</sup>, Changxin Xu<sup>3</sup>,  
6 Christopher J. Hunter<sup>4</sup>, Barry McCarthy<sup>4</sup>, Jordan Goldberg<sup>4</sup>, Saunil Dobariya<sup>4</sup>, Paul E.  
7 Holtzherimer<sup>7,8</sup>, Keith A. Young<sup>7,9,10</sup>, NYSCF Global Stem Cell Array® Team<sup>4</sup>, Traumatic Stress  
8 Brain Research Group, Scott A. Noggle<sup>4</sup>, John H. Krystal<sup>6,7</sup>, Daniel Paull<sup>4</sup>, Matthew J.  
9 Girgenti<sup>6,7</sup>, Rachel Yehuda<sup>3</sup>, Kristen J. Brennan<sup>2#</sup>, Laura M. Huckins<sup>2#</sup>

10

11 **AFFILIATIONS:**

12 <sup>1</sup>Department of Genetics and Genomic Sciences, Icahn School of Medicine at Mount Sinai, New  
13 York, NY

14 <sup>2</sup>Departments of Psychiatry and Genetics, Division of Molecular Psychiatry, Yale University  
15 School of Medicine, New Haven, CT

16 <sup>3</sup>James J. Peters Veterans Affairs Medical Center, Bronx, NY, USA

17 <sup>4</sup>The New York Stem Cell Foundation Research Institute

18 <sup>5</sup>Nash Family Department of Neuroscience, Friedman Brain Institute, Icahn School of Medicine  
19 at Mount Sinai, New York, NY

20 <sup>6</sup>Department of Psychiatry, Yale School of Medicine, New Haven CT, USA

21 <sup>7</sup>US Department of Veterans Affairs National Center for PTSD

22 <sup>8</sup>Department of Psychiatry, Geisel School of Medicine at Dartmouth, Lebanon, NH 03756, USA

23 <sup>9</sup>Department of Psychiatry and Behavioral Sciences, Texas A&M College of Medicine, Bryan,  
24 Tex.,

25 <sup>10</sup>Central Texas Veterans Health Care System, Temple, Tex.

26 <sup>11</sup>Department of Psychiatry Center for the Study of Traumatic Stress Uniformed Services,  
27 University of the Health Sciences Bethesda MD.

28

29 \* These authors contributed equally

30 # Correspondence:

31 [Laura.huckins@yale.edu](mailto:Laura.huckins@yale.edu), [Kristen.brenannd@yale.edu](mailto:Kristen.brenannd@yale.edu)

32

33

34 **CONFLICT OF INTEREST STATEMENT**

35 J.H.K. has consulting agreements (less than US\$10,000 per year) with the following: Aptinyx, Inc.  
36 Biogen, Idec, MA, Bionomics, Limited (Australia), Boehringer Ingelheim International, Epiodyne,  
37 Inc., EpiVario, Inc., Janssen Research & Development, Jazz Pharmaceuticals, Inc., Otsuka  
38 America Pharmaceutical, Inc., Spring Care, Inc., Sunovion Pharmaceuticals, Inc.; is the co-  
39 founder for Freedom Biosciences, Inc.; serves on the scientific advisory boards of Biohaven  
40 Pharmaceuticals, BioXcel Therapeutics, Inc. (Clinical Advisory Board), Cerevel Therapeutics,  
41 LLC, Delix Therapeutics, Inc., Eisai, Inc., EpiVario, Inc., Jazz Pharmaceuticals, Inc., Neumora  
42 Therapeutics, Inc. , Neurocrine Biosciences, Inc., Novartis Pharmaceuticals Corporation,  
43 PsychoGenics, Inc., Takeda Pharmaceuticals, Tempero Bio, Inc., Terran Biosciences, Inc..; has  
44 stock options with Biohaven Pharmaceuticals Medical Sciences, Cartego Therapeutics, Damona  
45 Pharmaceuticals, Delix Therapeutics, EpiVario, Inc., Neumora Therapeutics, Inc., Rest  
46 Therapeutics, Tempero Bio, Inc., Terran Biosciences, Inc., Tetricus, Inc.; and is editor of  
47 Biological Psychiatry with income greater than \$10,000.

48 K.J.B. is on the scientific advisory board of Neuro Pharmaka and Rumi Scientific.

49 P.E.H receives royalties from Oxford University Press and UpToDate.

50

51 **ABSTRACT** [150 words]

52 To explain why individuals exposed to identical stressors experience divergent clinical outcomes,  
53 we determine how molecular encoding of stress modifies genetic risk for brain disorders. Analysis  
54 of post-mortem brain (n=304) revealed 8557 stress-interactive expression quantitative trait loci  
55 (eQTLs) that dysregulate expression of 915 eGenes in response to stress, and lie in stress-  
56 related transcription factor binding sites. Response to stress is robust across experimental  
57 paradigms: up to 50% of stress-interactive eGenes validate in glucocorticoid treated hiPSC-  
58 derived neurons (n=39 donors). Stress-interactive eGenes show brain region- and cell type-  
59 specificity, and, in post-mortem brain, implicate glial and endothelial mechanisms. Stress  
60 dysregulates long-term expression of disorder risk genes in a genotype-dependent manner;  
61 stress-interactive transcriptomic imputation uncovered 139 novel genes conferring brain disorder  
62 risk only in the context of traumatic stress. Molecular stress-encoding explains individualized  
63 responses to traumatic stress; incorporating trauma into genomic studies of brain disorders is  
64 likely to improve diagnosis, prognosis, and drug discovery.

65

66 **INTRODUCTION**

67 Traumatic stress is associated with significant physical and psychological comorbidities<sup>1-</sup>  
68 <sup>4</sup>, and increases the risk for and severity of many psychiatric and non-psychiatric medical  
69 disorders<sup>5-10</sup>. Given that only some individuals who experience trauma will ultimately develop  
70 psychiatric disorders<sup>11</sup>, a long-standing hypothesis is that stress susceptibility may be genetically  
71 encoded<sup>12</sup>. The effects of trauma are long-lasting and detectable months or years after  
72 exposure<sup>13</sup>; this biological encoding may occur through regulation of gene expression<sup>14-21</sup>.  
73 Genetic variation is widely thought to moderate the molecular encoding of stress, likely via a  
74 multitude of molecular and cellular alterations including epigenetic modifications of gene  
75 expression and downstream effects on glucocorticoid function<sup>22</sup>. For example, polymorphisms in  
76 neurotransmitter receptors<sup>23</sup>, metabolizers<sup>24</sup> and *FKBP5*<sup>25-28</sup> modify the impact of traumatic stress  
77 on psychiatric disorder incidence<sup>29,30</sup>. This can be modelled *in vitro* using human induced  
78 pluripotent stem cell (hiPSC)-derived glutamatergic neurons (iGLUTs). For example, iGLUTs from  
79 combat-exposed veterans with post-traumatic stress disorder (PTSD) exhibited hyper-responsive  
80 glucocorticoid (hCort)-elicited transcriptional signatures relative to those from combat-exposed  
81 veterans without PTSD<sup>31</sup>. This diagnosis-dependent transcriptomic response to glucocorticoids  
82 raises the question of whether these intrinsic individual differences in stress encoding are  
83 mediated by genetic variation. Put simply, how does the variation among individual genomes yield  
84 differential stress response?

85 To answer this requires careful examination of how genomes and environmental factors  
86 interact, and in particular how genotype x environment interactions shape higher order biology.  
87 Examples of cell-type-specific<sup>32,33</sup>, sex-specific<sup>34-36</sup>, developmental stage-specific<sup>37,38</sup>, and drug  
88 exposure-specific<sup>39</sup> genetic regulation of gene expression abound; however, studies of genotype  
89 x stress interactions have progressed more slowly due to difficulties in quantifying stress in  
90 genetic and post-mortem brain cohorts. Consequently, it is likely that we have not yet identified  
91 many of the genes that confer risk for psychiatric disorders only in the context of extreme stress.

92 Although human neurons show differential acute response to hCort by diagnosis,  
93 leveraging this to predict individualized physiological response to trauma is more complex.  
94 Whereas *in vitro* experiments facilitate controlled addition of a single stressor (here, hCort) at a  
95 defined dose and duration, modelling trauma in the human brain requires delineation of trauma  
96 type, degree, chronicity, and years prior to death, and as a result the impact of accumulated  
97 trauma on the human brain is unclear. Likewise, while *in vitro* studies can focus on a single cell  
98 type (here, iGLUTs), human brain studies incorporate the effect of dynamic interactions between  
99 circuits and cells in the brain. Despite their power for precise comparisons, it is not yet clear how  
100 well human neurons *in vitro* model trauma response in the human brain. Thus, for the first time,  
101 we investigate if and how human genetic variation confers differential encoding of stress-induced  
102 transcriptional phenotypes, examining in parallel post-mortem brains (n=304 donors, with and  
103 without known trauma exposure, in tissues from the cortex<sup>40-43</sup> and amygdala<sup>41-45</sup>) and hiPSC-  
104 neurons (n=39 donors, with and without hCort treatment: iGLUTs and iGABAs).

105 We set out to demonstrate how trauma may dysregulate gene expression in a genotype-  
106 specific manner (e.g., trauma-eQTLs) in the post-mortem brain and test whether these are  
107 analogous to responses observed *in vitro* (e.g., hCort-eQTLs). To the extent that there is a high  
108 degree of overlap between these two measures (e.g., stress-eQTLs), we can reasonably  
109 conclude that information obtained from these two disparate analyses yields reliable and  
110 functionally meaningful information about genetic contributions to stress responsivity, the  
111 development of stress induced psychopathology, and possibly resilience. Modelling these  
112 genotype-stress interactions and their impacts on gene expression moreover allows us to  
113 examine the potential impacts of stress on a variety of neuropsychiatric disorders. By developing  
114 machine-learning models that predict stress-dynamic gene expression on an individual level, we  
115 ask whether we can identify new genes associated with these disorders, effectively translating  
116 existing 'static' case-control genome wide association study results to dynamic insights into  
117 genotype-dependent response to stress.

118



119

## 120 **METHODS**

121

### 122 ***Human trauma-exposed post-mortem brain cohort***

123 304 post-mortem brain samples (94 control, 105 PTSD, 105 MDD; 136 trauma-exposed; 168  
124 without known trauma exposure) were collected as part of an existing study<sup>42</sup> (**S. Figure 1A, B**).

125 A retrospective clinical diagnostic review was conducted on every brain donor, consisting  
126 of telephone screening, macroscopic and microscopic neuropathological examinations, autopsy  
127 and forensic investigative data, two sources of toxicology data, extensive psychiatric treatment,  
128 substance abuse treatment, and medical record reviews, and family informant interviews (i.e.,  
129 next-of-kin could be recontacted and was agreeable to phone contact, which included the PTSD  
130 Checklist (i.e., PCL-5 and/or the MINI). A history of traumatic exposure including exposure to  
131 military combat, physical abuse, sexual abuse, emotional abuse, and/or other traumas were  
132 obtained as part of the telephone screening, records reviews, and/or PCL-5. A board-certified  
133 psychiatrist with expertise in PTSD reviewed every case to rate presence/absence of PTSD  
134 symptoms. All data were compiled into a comprehensive psychiatric narrative summary that was  
135 reviewed by two board-certified psychiatrists, in order to arrive at lifetime DSM-5 psychiatric  
136 diagnoses (including substance use disorders/intoxication) and medical diagnoses. Non-  
137 psychiatric healthy controls were free from psychiatric and substance use diagnoses, and their  
138 toxicological data was negative for drugs of abuse.

139 Cumulative trauma burden was quantified by adding up instances of reported traumatic  
140 exposure, as previously defined<sup>46–48</sup>. Briefly, traumas included in this analysis included sexual  
141 abuse, physical abuse, neglect, witnessing trauma, combat or occupational traumas, assault, and  
142 natural disasters. Cumulative trauma was coded independently by three investigators and finally  
143 determined by consensus.

144

### 145 ***hiPSC-derived neuron cohort***

146 A total of 46 donors (n=23 PTSD, n=23 Control) (**Table S1**) were recruited as previously  
147 described. Briefly, participants in this study were combat-exposed veterans with and without  
148 PTSD who provided written informed consent (VA HS no. YEH-16-03 and ISMMS HS no. 15-  
149 00886) and from whom a viable blood and/or fibroblast sample was obtained and sufficient RNA  
150 for genome-wide expression analyses was extracted. All participants experienced deployment to  
151 active military combat zones and reported a DSM-IV criterion A combat trauma. Individuals with  
152 and without PTSD did not have significant differences in childhood or pre-deployment trauma,

153 deployment number or cumulative duration. Participants underwent psychological evaluation  
154 using the Structured Clinical Interview for DSM-5 (SCID) and the Clinician Administered PTSD  
155 Scale (CAPS) for determination of PTSD diagnosis and severity. Eligibility criteria and thresholds  
156 were based on CAPS for DSM-IV; PTSD(+) had a current CAPS-IV total score above 40  
157 (frequency plus intensity), whereas PTSD(-) participants were combat-exposed veterans with a  
158 total score below 40.

159

### 160 ***Automated generation of hiPSC-derived ASCL1- and DLX2-induced GABAergic neurons***

161 GABAergic neurons (iGABA) were generated from hiPSCs using high-throughput automated  
162 differentiations, in three batches, as previously described<sup>49</sup> with some modifications. hiPSCs were  
163 single-cell passaged after a 20-min dissociation with Accutase (STEMCELL Technologies) at  
164 37 °C and 5% CO<sub>2</sub>. A total of 1 million cells per well were plated in 12-well Cultrex-coated (R&D  
165 Systems, catalog no. 3434-010-02) tissue culture plates (Corning Costar) in PSC Feeder Free  
166 Medium (Thermo Fisher Scientific, catalog no. A14577SA) with 1 μM thiazovivin (Sigma-Aldrich,  
167 catalog no. SML1045). Lentivirus (generated by ALSTEM) carrying TetO-Ascl1-puro (Addgene,  
168 catalog no. 97329), Teto-DLX2-hygro (Addgene catalog no. 97330) and FUDeltaGW-rtTA  
169 (Addgene, catalog no. 19780) was diluted to a multiplicity of infection of one each (1 million  
170 genome counts of each vector per transduction) in 100 μl DPBS, no calcium, no magnesium  
171 (Thermo Fisher Scientific) and added directly after cell seeding. After 24 h, the medium was  
172 exchanged (-1.1 mL +1 mL) with Neural Induction Medium (NIM) comprising a 50:50 mix of  
173 DMEM/F12 and Neurobasal, with 1× B27 plus vitamin A, 1× N2, 1× Glutamax (Thermo Fisher  
174 Scientific) and 1 μM doxycycline hyclate (Sigma-Aldrich). After 24 h, the medium was removed  
175 and NIM was added with doxycycline plus 5 μg ml<sup>-1</sup> puromycin and 250 μg ml<sup>-1</sup> hygromycin B  
176 (Thermo Fisher Scientific) (NIM selection medium). Daily medium exchanges were performed  
177 with NIM selection medium for 5 days post induction. On day 6 after induction, cells were  
178 passaged by incubating with Accutase for 45 min at 37 °C and 5% CO<sub>2</sub>. A series of 96-well plates  
179 (PerkinElmer CellCarrier Ultra) were coated with 0.1% polyethylenimine (Sigma-Aldrich, catalog  
180 no. 408727) in 0.1 M borate buffer pH 8.4 for 30 min at room temperature, washed five times with  
181 water and prefilled with 100 μl per well of neural coating medium comprising Brainphys medium  
182 (STEMCELL Technologies) with 1× B27 plus vitamin A, 1 μM thiazovivin, 5 μg ml<sup>-1</sup> puromycin,  
183 250 μM dibutyl cAMP (dbcAMP, Sigma-Aldrich), 40 ng ml<sup>-1</sup> brain-derived neurotrophic factor  
184 (BDNF, R&D Systems), 40 ng ml<sup>-1</sup> glial cell line-derived neurotrophic factor (GDNF, R&D  
185 Systems), 200 μM ascorbic acid (Sigma-Aldrich) and 10 μg ml<sup>-1</sup> natural mouse laminin (Sigma-  
186 Aldrich). A sample of cells were stained with 10 μg ml<sup>-1</sup> Hoechst plus 1:500 acridine

187 orange/propidium iodide solution and counted on an Opera Phenix confocal microscope  
188 (PerkinElmer). A total of 100,000 cells per well were seeded into neural coating medium-filled 96-  
189 well plates in 100  $\mu$ l per well of neural medium comprising Brainphys medium with 1 $\times$  B27 plus  
190 vitamin A, 1  $\mu$ M thiazovivin, 250  $\mu$ M dbcAMP, 40 ng ml<sup>-1</sup> BDNF, 40 ng ml<sup>-1</sup> GDNF, 200  $\mu$ M  
191 ascorbic acid and 1  $\mu$ g ml<sup>-1</sup> natural mouse laminin. At 24 h after seeding, medium was exchanged  
192 for neural selection medium comprising Brainphys medium with 1 $\times$  B27 plus vitamin A, 250  $\mu$ M  
193 dbcAMP, 40 ng ml<sup>-1</sup> BDNF, 40 ng ml<sup>-1</sup> GDNF, 200  $\mu$ M ascorbic acid, 1  $\mu$ g ml<sup>-1</sup> natural mouse  
194 laminin and 2  $\mu$ M arabinosylcytosine (Ara-C, Sigma-Aldrich). After 48 h, the neural selection  
195 medium was fully exchanged and after a further 48 h the medium was fully exchanged with neural  
196 maintenance medium (NMM) comprising Brainphys medium with 1 $\times$  B27 plus vitamin A, 250  $\mu$ M  
197 dbcAMP, 40 ng ml<sup>-1</sup> BDNF, 40 ng ml<sup>-1</sup> GDNF, 200  $\mu$ M ascorbic acid and 1  $\mu$ g ml<sup>-1</sup> natural  
198 mouse laminin. Thereafter, every 48 h, half the medium was exchanged with NMM until day 21  
199 post-transduction passage. All medium exchanges were performed using a Hamilton Star liquid  
200 handler set to 5  $\mu$ l s<sup>-1</sup> for aspirate and dispense as part of the NYSCF Global Stem Cell Array®.  
201 Passages were fully automated and performed on a robotic cluster comprising a Thermo Fisher  
202 Scientific C24 Cytomat incubator, a Hamilton Star liquid handler, an Agilent microplate centrifuge,  
203 a Precise Automation PreciseFlex 400 Sample Handler and a PerkinElmer Opera Phenix.  
204 At harvest, medium was removed using the Bluewasher (BlueCatBio) and cells were lysed for  
205 5 min using RLT plus buffer (Qiagen), snap frozen on dry ice and stored at -80 °C. A replicate  
206 plate was fixed for immunofluorescence analysis by adding 32% paraformaldehyde (Electron  
207 Microscopy Sciences) directly to medium to a final concentration of 4% and incubated at room  
208 temp for 15 min. Cells were washed three times with HBSS (Thermo Fisher Scientific), stained  
209 overnight with rabbit anti-GABA 1:1000 (Sigma, catalog no. A2052), mouse anti-Nestin 1:3,000  
210 (Millipore, catalog no. 09-0024) and chicken anti-MAP2 1:3,000 (Abcam, catalog no. 09-0006) in  
211 5% normal goat serum (Jackson ImmunoResearch) in 0.1% Triton X-100 (Thermo Fisher  
212 Scientific) in HBSS. Primary antibodies were counterstained with goat anti-rabbit Alexa Fluor 488,  
213 goat anti-mouse Alexa Fluor 555, goat anti-chicken Alexa Fluor 647 and 10  $\mu$ g ml<sup>-1</sup> Hoechst for  
214 1 h at room temp. Cells were washed three times with HBSS. 10 fields ( $\times$ 40 water objective) each  
215 with 8 planes (2 $\mu$ m apart) were imaged per well (one well per condition per line) using the  
216 PerkinElmer Opera Phenix microscope in confocal mode with 2x image binning (**S. Figure**  
217 **4**). Cells are developmentally similar to previous hiPSC studies (**S. Figure 5A-C**).

218

#### 219 ***Glucocorticoid treatment***

220 HCort treatment medium was prepared by first dissolving HCort (Sigma-Aldrich, catalog no.

221 H0888) in ethanol to make a 2.8 mM stock. HCort ethanol stock was then diluted to 0.2 mM in  
222 HBSS. Ethanol was equalized to 15  $\mu$ M in control and all treatment media. The final treatment  
223 medium was prepared by diluting HCort stocks into NMM, before applying to cells by fully  
224 exchanging medium. Neurons were treated with HCort for 24 h (baseline, 100 nM, 1,000 nM).  
225 HCort treatment did not impact cell number of maturity (**S. Figure 5D**).

226

### 227 ***Genotype preprocessing***

228 Genotype imputation was performed using the Michigan Imputation Server using the 1000 Human  
229 Genomes Project Phase 3 reference dataset using human genome build hg19. Genotypes were  
230 filtered using plink v1.9 to remove sex chromosomes, insertions/deletions, ambiguous genotypes,  
231 and retain common variants (MAF>5%), variants present in the majority of samples  
232 (missingness<10%), and variants meeting Hardy Weinberg equilibrium expectations ( $p > 1 \times 10^{-6}$ ).  
233 Principal component analysis (PCA) was performed using plink v1.9 to determine genomic  
234 ancestry components which were used as covariates in downstream analysis (**S. Figure 1C**). All  
235 eQTL analyses used genotype dosages.

236

### 237 ***RNA sequencing***

238 RNA sequencing was performed as described previously<sup>42</sup>. Quality control was performed on  
239 paired-end raw sequencing reads and low-quality reads were filtered using FastQC. Short reads  
240 with Illumina adapters were trimmed using Scythe and sickle. Reads were mapped to the  
241 hg38/GRCh38 human reference genome with Rsubread. Feature-level quantification based on  
242 GENCODE release 25 (GRCh38.p7) annotation was run on aligned reads using featureCounts  
243 (subread version 1.5.0-p3) with a median 43.8% (IQR:37.3%-49.0%) of mapped reads assigned  
244 to genes.

245 Raw count data was filtered to remove low-expressed genes that did not meet the  
246 requirement of a minimum of 20 counts in at least ~20% of samples. All expression values were  
247 converted to  $\log_2$ CPM and normalized to library size from mean-variance relationship estimates  
248 using edgeR v3.32.0 and limma v3.36.0. Normalized expression was subjected to unsupervised  
249 principal component analysis (PCA) to identify outliers that lay outside 95% confidence intervals  
250 from the grand averages. Variance explained by confounders such as age at death, RNA quality  
251 RIN score, post-mortem interval, and sex was determined using VariancePartition (**S. Figure 1D**).  
252 To detect hidden sources of variation in the expression data, surrogate variable analysis was  
253 performed for each brain tissue separately using sva v3.30.1 with the “be” method, preserving the  
254 effects of cumulative trauma. Surrogate variables were then residualized from normalized

255 expression values. This tissue-specific, surrogate variable-residualized matrix was used for  
256 subsequent analyses.

257

### 258 **Power determinations**

259 To ensure sufficient power to detect eQTLs in the post-mortem brain cohort, power was assessed  
260 based on effect size, variance, and sample size assumptions from the GTEx Project<sup>50</sup>. This study  
261 was powered at 80% to detect a linear association of genotype with a minor allele frequency  
262 (MAF)  $\geq$  6.35% with expression (**S. Figure 1E**).

263 Given the lack of empirical data on eQTL detection in hiPSC-induced neurons, power  
264 calculations were based on effect size, variance, and sample size assumptions from post-mortem  
265 studies as above. However, these analyses are confounded by age, sex, diagnosis, medication  
266 use, post-mortem interval and more. Data in hiPSC-induced neurons has detected up to 10-fold  
267 larger effect sizes relative to post-mortem studies and 2-to-4-fold reductions in standard deviation  
268 (SD) per gene<sup>51-53</sup>. Assuming a 4-fold relative reduction in SD at a 20,000 SNPs-per-gene level,  
269 this study was sufficiently powered at 80% to detect an association of variants with a MAF  $\geq$  4.06%  
270 with expression (**S. Figure 1F**).

271

### 272 **eQTL detection**

273 MatrixEQTL was used to detect variants regulating expression within a +/- 1MB cis window.  
274 Multiple testing correction was applied using a Bonferroni-corrected p-value threshold for  
275 the number of SNPs tested per gene. The genotypic contribution to expression ('base-eQTLs')  
276 was assessed using eqn. 1. An interaction term (eqn. 2) was modelled to identify how this  
277 regulatory relationship changed in the context of stress. Significant variants in this analysis were  
278 termed stress-interactive eQTLs. This method performs independent tests on each variant, and  
279 therefore overestimates the true number of variants contributing to gene expression due to linkage  
280 disequilibrium. Forward-stepwise conditional analysis was performed to identify conditionally  
281 independent signals.

282

$$Exp_i \sim Dos_j + PC1 + PC2 + \dots + PC10$$

283 **Equation. 1: Calculation of Base eQTLs.** Where Exp is expression of gene i; Dos is dosage of SNP j.  
284 eQTL relationships are calculated for all SNPs within the cis-region of gene i.

285

$$Exp_i \sim (Dos_j * N_{Trauma}) + PC1 + PC2 + \dots + PC10$$

286 **Equation. 2: Calculation of Trauma-interaction eQTLs.** Where Exp is expression of gene i; Dos is  
287 dosage of SNP j;  $N_{Trauma}$  is the total trauma count per person. eQTL relationships are calculated for all  
288 SNPs within the cis-region of gene i.

289

### 290 ***eQTL linear model assumption testing***

291 Interactive eQTLs are susceptible to unequal variance at extreme ends of environmental  
292 exposure and with increasing dosage of the minor allele, leading to violation of linear regression  
293 assumptions. Ordinary least squares regression (OLS) ensured the robustness of stress-  
294 interactive eQTLs. There are four assumptions of OLS: linearity of the predictor and response,  
295 independence, normality of the errors, and homoscedasticity (constant error variance). The  
296 relationships of SNP dosage and expression are assumed to be linear, as is the relationship  
297 between expression and traumatic exposure. Independence also is satisfied as the data is not  
298 time-series. The assumption of normality was statistically tested for each model using the  
299 Shapiro-Wilk test in R. The assumption of homoscedasticity was assessed using the Koenker's  
300 studentized version of the Breusch-Pagan test, `bptest()` in the `lmtest` package, v 0.9-38.  
301 Significance in either of these tests indicates the samples come from a non-normal or  
302 heteroskedastic population, respectively. A model was deemed to meet the assumptions if the  
303 test statistic of both tests was non-significant at a p value threshold of 0.05.

304

### 305 ***eQTL replication***

306 Overlap between eQTLs and eGenes identified in our analysis with Bonferroni-significant  
307 associations in previous Common Mind Consortium<sup>53</sup> and GTEx<sup>50</sup> analyses (**S. Figure 2A**) was  
308 assessed for matching tissues using percentage overlap over SNP-gene pairs, eGenes, and  
309 using the `pi1` statistic from the `qvalue` package (v 2.33.0).

310

### 311 ***Forward step-wise conditional analysis***

312 To identify conditionally independent eQTLs, step-wise conditional analysis was performed<sup>54</sup>.  
313 Briefly, eQTLs were first associated using MatrixEQTL. Significance was initially assessed using  
314 a Bonferroni-corrected threshold across all *cis*-eQTL tests within each gene. P values were not  
315 re-assessed at each conditional step; instead, a fixed p value threshold was used as the inclusion  
316 criteria in the stepwise model selection. For each gene with at least one *cis*-eQTL (gene  $\pm$  1 Mb)  
317 association at a 5% false discovery rate (FDR), the most significant SNP was added as a covariate  
318 in order to identify additional independent associations (considered significant if the p value  
319 achieved was less than that corresponding to the Bonferroni threshold for primary eQTL). This  
320 procedure was repeated iteratively until no further eQTL met the p value threshold criteria (**S.**  
321 **Figure 2B**).

322



323 ***Pair-wise eQTL colocalization***

324 Pair-wise colocalization using coloc<sup>55</sup>, with loci defined by each lead SNP  $\pm$  1 Mb, determine  
325 whether or not eQTL architecture was conserved across conditions (brain regions, cell types,  
326 exposure to HCort) (**S. Figure 2C**). To determine whether shared significant eGenes had  
327 equivalent underlying genetic regulation under multiple conditions (ie: across different brain  
328 regions, in the brain vs in hiPSC-derived neurons, or in hiPSC-derived neurons treated with  
329 varying amounts of HCort), genes with a PPH4>0.8 were selected. To determine eGenes that  
330 were significant in multiple conditions but due to different underlying genetic regulation, genes  
331 with a PPH3>0.8 were selected (**S. Figure 2D**).

332

333 ***Gene set enrichment***

334 Gene set enrichment of GO biological processes, cellular components, and molecular function,  
335 and genome-wide association studies (GWAS) catalog reported genes, was performed using  
336 FUMA<sup>56</sup>. Where relevant, stress-interactive eGene enrichments were always performed against  
337 base eGenes as a background. If not specified, the background gene list used was expressed  
338 genes in each relevant post-mortem brain region as defined by genes that met a minimum of 20  
339 counts in ~20% of samples.

340

341 ***Cell type-specific expression imputation***

342 To determine cell type proportions of the four post-mortem brain regions included in our analysis,  
343 log-2-normalized TPM expression matrices were input to CIBERSORTx<sup>57</sup> alongside  
344 PsychENCODE single cell reference gene signatures<sup>58-60</sup>. Cell type proportions derived from  
345 CIBERSORTx were input to bMIND<sup>61</sup> alongside the bulk RNA log-2-normalized expression matrix  
346 to derive imputed cell type specific expression. To detect hidden sources of variation in imputed  
347 expression data, sva<sup>62</sup> was performed for each cell type-imputed expression matrix. This tissue-  
348 specific, surrogate variable-residualized matrix was used for subsequent analyses.

349

350 ***Motif enrichment***

351 Lead SNPs from both base and stress-interactive conditional analysis and any SNPs in high  
352 LD>0.8 were used to query Haploreg<sup>63</sup> to determine motifs disrupted by each SNP. Motifs more  
353 often disrupted by stress-interactive eQTLs were determined using a binomial test.

354

355 ***Transcription factor validation***

356 Validated control hiPSC-derived NPCs for RNAi were selected from a previously reported  
357 case/control hiPSC cohort of childhood onset SCZ (COS): NSB553-S1-1 (male, European  
358 ancestry), NSB2607-1-4 (male, European ancestry). hiPSC-NPCs were generated and validated  
359 as previously described (ref) and cultured in hNPC media (DMEM/F12 (Life Technologies  
360 #10565), 1x N2 (Life Technologies #17502-048), 1x B27-RA (Life Technologies #12587-010), 1x  
361 Antibiotic-Antimycotic, 20 ng/ml FGF2 (Life Technologies)) on Matrigel (Corning, #354230).  
362 hiPSC-NPCs at full confluence ( $1-1.5 \times 10^7$  cells / well of a 6-well plate) were dissociated with  
363 Accutase (Innovative Cell Technologies) for 5 mins, spun down (5 mins X 1000g), resuspended,  
364 and seeded onto Geltrex-coated plates at  $3-5 \times 10^6$  cells / well. Media was replaced every two-to-  
365 three days for up to seven days until the next split.

366 At day -1, NPCs were transduced with rtTA (Addgene 20342) and *NGN2* (Addgene 99378)  
367 lentiviruses. Medium was switched to non-viral medium four hours post infection. At day 0 (D0),  
368 1  $\mu\text{g/ml}$  dox was added to induce *NGN2*-expression. At D1, transduced hiPSC-NPCs were treated  
369 with antibiotics to select for lentiviral integration (300 ng/ml puromycin for dCas9-effectors-Puro,  
370 1 mg/ml G-418 for *NGN2*-Neo). At D3, NPC medium was switched to neuronal medium  
371 (Brainphys (Stemcell Technologies, #05790), 1x N2 (Life Technologies #17502-048), 1x B27-RA  
372 (Life Technologies #12587-010), 1  $\mu\text{g/ml}$  Natural Mouse Laminin (Life Technologies), 20 ng/ml  
373 BDNF (Peprotech #450-02), 20 ng/ml GDNF (Peprotech #450-10), 500  $\mu\text{g/ml}$  Dibutyl cyclic-  
374 AMP (Sigma #D0627), 200 nM L-ascorbic acid (Sigma #A0278)) including 1  $\mu\text{g/ml}$  Dox. 50% of  
375 the medium was replaced with fresh neuronal medium once every 2-3 days.

376 On day 5, young neurons were replated onto geltrex-coated 12-well plates at  $1.2 \times 10^6$   
377 cells / well. Cells were dissociated with Accutase (Innovative Cell Technologies) for 5-10 min,  
378 washed with DMEM, gently resuspended, counted and centrifuged at 1,000xg for 5 min. The pellet  
379 was resuspended at a concentration of  $1.2 \times 10^6$  cells/mL in neuron media [Brainphys (StemCell  
380 Technologies #05790), 1xN2 (ThermoFisher #17502-048), 1xB27-RA (ThermoFisher #12587-  
381 010), 1 mg/ml Natural Mouse Laminin (ThermoFisher #23017015), 20 ng/mL BDNF (Peprotech  
382 #450-02), 20 ng/mL GDNF (Peprotech #450-10), 500 mg/mL Dibutyl cyclic-AMP (Sigma  
383 #D0627), 200 nM L-ascorbic acid (Sigma #A0278)] with doxycycline. Doxycycline was fully  
384 withdrawn from the neuronal media at day 7.

385 At D13, iGLUTs were treated with 200 nM Ara-C to reduce the proliferation of residual  
386 non-neuronal cells in the culture, followed by half medium changes. At D17, Ara-C was completely  
387 withdrawn by full medium change while adding media containing pooled shRNA vectors, either  
388 targeting *YY1*, *MYC*, or scramble controls. Medium was switched to non-viral medium four hours  
389 post infection. At D18, transduced iGLUTs were treated with corresponding antibiotics to the



390 shRNA lentiviruses (300 ng/ml puromycin). 24 hours prior to harvest (D20), iGLUTs were treated  
391 with 1  $\mu$ M hCort or ethanol vehicle control. Neurons were harvested for RNA extraction and bulk  
392 RNA-seq at D21. Samples from 3 wells per condition per donor were harvested in total (6 samples  
393 per condition total).

394

### 395 ***Neuronal pooled CRISPRi screen***

396 128 putative regulatory regions were prioritized corresponding to 65 eGenes based on minimizing  
397 distance to transcription start site, presence in glutamatergic neuron open chromatin, and in GR  
398 binding sites, obtained from ReMap2022. gRNA design was conducted using Benchling and  
399 CRISPR-ERA. gRNAs were selected based on their lack of predicted off targets and E scores  
400 (**Table S3**). Generation of the CRISPRi guide library and lentiviral packaging were outsourced to  
401 GenScript. Briefly, gRNA DNA oligos were synthesized and cloned into the lentiGuide-Hygro-  
402 mTagBFP2 plasmid which was confirmed by next generation sequencing. Plasmids were  
403 packaged into lentivirus at a titer of  $1.34 \times 10^8$ .

404 For pooled analysis, validated control (from donors 2607 and 553, as above) hiPSC-  
405 derived NPCs expressing dCas9-KRAB for CRISPRi were transduced with rtTA (Addgene 20342)  
406 and *NGN2* (Addgene 99378) lentiviruses and grown as described above. At D17, pools of mixed  
407 gRNA vectors (Addgene 99374), either targeting relevant genes or scramble controls, were added  
408 to the neuronal media. Medium was switched to non-viral medium four hours post infection. At  
409 D18, transduced iGLUTs were treated with corresponding antibiotics to the gRNA lentiviruses (1  
410 mg/ml HygroB for lentiGuide-Hygro/lentiGuide-Hygro-mTagBFP2). 24 hours prior to harvest (D20),  
411 iGluts were treated with 1  $\mu$ M hCort or an ethanol vehicle as a control. At D21, iGLUT neurons  
412 were dissociated to single cell suspensions with papain, antibody-hashed, and bar-coded single  
413 cell cDNA generated using 10X Genomics Chromium in order to perform ECCITE-seq. 20,000  
414 cells were sequenced per sample, with four samples in total submitted for single cell sequencing  
415 (one per condition per donor).

416 Expanded CRISPR-compatible CITE-seq (ECCITE-seq) combines Cellular Indexing of  
417 Transcriptomes and Epitopes by sequencing (CITE-seq) and Cell Hashing for multiplexing and  
418 doublet detection with direct detection of sgRNAs to enable single cell CRISPR screens with  
419 multi-modal single cell readout. By capturing pol III-expressed guide RNAs directly, this  
420 approach overcomes limitations of other single-cell CRISPR methods, which detect guide  
421 sequences by a proxy transcript, resulting in barcode switching and lower capture rates.

422

### 423 ***Analysis of single-cell CRISPRi screen***

424 Single cell sequencing reads were mapped to the GRCh38 reference genome using Cellranger  
425 3.1.0. Kallisto<sup>64</sup> was used to generate HTO counts and index GDO libraries. Seurat (v.2.3.0) was  
426 used for QC, normalization, cell clustering, HTO/GDO demultiplexing, and DEG analysis. Each  
427 sequencing lane was initially processed separately. Cells with RNA UMI feature counts were  
428 filtered ( $200 < nFeature\_RNA < 8000$ ) and the percentage of all the counts belonging to the  
429 mitochondrial, ribosomal, and hemoglobin genes calculated using  
430 Seurat::PercentageFeatureSet. Hashtag and guide-tag raw counts were normalized using  
431 centered log ratio transformation. For demultiplexing based on hashtag, Seurat::HTODemux  
432 function was used; and for guidetag counts Seurat::MULTIseqDemux function within the Seurat  
433 package was performed with additional MULTIseq semi-supervised negative-cell reclassification.  
434 To remove variation related to cell-cycle phase of individual cells, cell cycle scores were assigned  
435 using Seurat::CellCycleScoring. RNA UMI count data was then normalized, log-transformed and  
436 the percent mitochondrial, hemoglobin, and ribosomal genes, cell cycle scores (Phase)  
437 regressed out using Seurat::SCTransform (**S. Figure 6D**). Lanes were then integrated using  
438 Harmony 1.0<sup>65</sup>. To ensure that cells assigned to a guide-tag identity class demonstrated  
439 successful perturbation of the target gene, ‘weightednearest neighbor’ (WNN) analysis was  
440 performed to assign clusters based on both guide-tag identity class and gene expression. To  
441 identify successfully perturbed cells, pseudobulking was performed using donor as a grouping  
442 factor and calculated differential expression of each perturbed gene using edgeR v3.32.0 and  
443 limma v3.36.0.

444

#### 445 ***Transcriptomic imputation***

446 Elastic net regression with ten-fold cross validation was used to generate transcriptomic  
447 imputation models for each brain region of interest, using the glmnet package<sup>66</sup>. An 11<sup>th</sup> hold-out  
448 fold was used for testing. All cross-validation folds were balanced for diagnoses, ancestry, and  
449 other clinical variables. Two models were generated for each brain region; (1) a “base” model,  
450 where only SNP dosages were included in the regression analysis, and (2) a “stress-interactive”  
451 model, where SNP dosages, total traumatic event count, and the interaction between SNP  
452 dosages and traumatic exposures (SNP \* trauma) for all SNPs with a nominally significant  
453 interaction term ( $p < 0.05$ ) in the eQTL analysis were included in the regression analysis. For both  
454 models, only SNPs within the cis-region ( $\pm 1$  Mb) of each gene were included in the regression  
455 analysis. Accuracy of prediction was first estimated by comparing predicted expression to  
456 measured expression, across all ten cross-validation folds; this correlation was termed cross-  
457 validation  $R^2$  or  $R_{cv}^2$ . Next, accuracy was measured by predicting expression of the 11<sup>th</sup> hold-out

458 fold, and comparing predicted expression to measured expression. This correlation was termed  
459 within-sample validation  $R^2$ . Genes with  $R_{cv}^2 > 0.01$  and  $P < 0.05$ ) were included in our final  
460 predictor database.

461

#### 462 ***Application of transcriptomic imputation models to external biobanks***

463 Elastic net models were applied to the BioMe™ biobank and the UK Biobank. The BioMe™  
464 biobank consists of 28,250 individuals with matched genotype and electronic health records. The  
465 BioMe™ cohort is racially diverse (self-reported race: Hispanic American, 35%; European  
466 American, 34%; African American, 25%; Other 6%), with an average age of 59.84 (SE=17.85).  
467 As traumas are known to be unequally distributed across the population by race, expression was  
468 imputed separately by race and meta-analyzed together. Traumatic experiences in this cohort  
469 were defined through the EHR as described previously<sup>67</sup>.

470 UK Biobank is a national resource sampled from 22 assessment centers across the UK.  
471 Traumatic experiences were defined from structured interview completion of the mental health  
472 questionnaire, from positive answers to fields 20488, 20490, 20523, 20521, 20524, 20531, 20529,  
473 20526, 20530, 20528, 20527, 20487, and negative answers to 20491 and 20489. 157,322  
474 individuals who completed this survey were included in this analysis.

475 Genotype preprocessing was conducted as previously described here. Genotype dosages  
476 were scaled, and weights from each model were applied to each SNP, and summed to generate  
477 imputed expression for each gene. Next, expression was assessed for 12 binary case-control  
478 traits based on presence of ICD codes (PTSD: F43, MDD: F32, F33, ANX: F40, F41, SCZ: F20,  
479 ASD: F84, ADHD: F90, BP: F31, AN: F50, OCD: F42, AD: G30, AUD: F10). 10 genotype-derived  
480 PCs, age, and sex were used as covariates.

481 **RESULTS**

482

483 ***Genetic regulation of gene expression is modified by traumatic stress***

484 Baseline and trauma-interactive genetic regulatory relationships were examined across  
485 four stress disorder-related post-mortem brain regions (n=304 donors): the dorsolateral prefrontal  
486 cortex (DLPFC), the dorsal anterior cingulate cortex (dACC), the basolateral amygdala (BLA),  
487 and the medial amygdala (MeA). Across all four brain regions, 655,607 significant cis-eQTLs were  
488 identified, including 7,964 unique eGenes (**Figure 1C**). We term these trauma-independent  
489 associations **base eQTLs** and their target genes **base eGenes**. Base eQTLs significantly  
490 overlapped previously reported post-mortem brain eQTLs; 23.03% overlap with GTEx-DLPFC  
491 eQTLs (36.94% of eGenes; pi1 statistic: 0.85), and 18.86% overlap with GTEx-ACC eQTLs  
492 (31.09% of eGenes, pi1 statistic: 0.78). No BLA and MeA samples are available in GTEx;  
493 however, 15.19% of BLA eQTLs (24.76% of eGenes, pi1 statistic: 0.77) and 15.50% of MeA  
494 eQTLs (25.09% of eGenes, pi1 statistic: 0.78) overlap with bulk GTEx amygdala measures (**S.**  
495 **Figure 2A**).

496 Most base eGenes were shared across brain regions (69.1%), albeit with more overlap  
497 between cortical regions than amygdala regions. Of overlapping eGenes, between 458 and 712  
498 eGenes exhibited conditionally independent genetic regulation among tissue pairs, indicating  
499 divergent regulatory mechanisms despite shared eGenes (**S. Figure 2C, D**).

500 To assess how baseline regulatory relationships differ with degree of exposure to  
501 traumatic stress, the interaction effect between genotype dosage and cumulative trauma count  
502 on gene expression was tested (**Figure 1A**). We term eQTLs with a significant interaction effect  
503 **stress-interactive eQTLs** and their target genes **stress-interactive eGenes**. 8,557 **stress-**  
504 **interactive eQTLs** were identified across the post-mortem brain, corresponding to 915 unique  
505 **stress-interactive eGenes**. Significant stress-interactive eQTLs were not simply genes with  
506 differential expression due to trauma; 16%, 6%, 11%, and 16% of stress-interactive eGenes were  
507 nominally significant DEGs with traumatic exposure in the BLA, dACC, DLPFC, and MeA,  
508 respectively. Likewise, stress-interactive eQTLs were not always significant base eQTLs; 38%,  
509 36%, 34%, and 31% of stress-interactive eGenes were base eGenes in BLA, dACC, DLPFC, and  
510 MeA, respectively (e.g., rs11586632, **Figure 1B**).

511

512 ***Genes with underlying stress-interactive genetic regulation show region-specificity in***  
513 ***enrichment for neuropsychiatric traits***

514 Stress-interactive eGenes, relative to base eGenes, were less likely to be shared between  
515 brain regions; only 8.5% of stress-interactive eGenes had a significant stress-interactive eQTL in  
516 multiple brain regions, compared to 69.1% of base eGenes (**Figure 1C**). These differences were  
517 not driven by variance in cell type proportion between brain tissues (**S. Figure 3A**), as after adding  
518 region-specific cell type proportions as a covariate, 87.3 - 90.1% of stress-interactive eGenes and  
519 97.4 - 98.0% of base eGenes remained significant, suggesting that these eGenes were not largely  
520 explained by cell type proportion (**S. Figure 3B**). Overall, stress-interactive eGenes were less  
521 likely than base eGenes to be shared between brain regions, suggesting region-specificity in  
522 genetically regulated encoding of traumatic experiences.

523 Stress-interactive eGenes, compared to base eGenes, were differentially enriched in gene  
524 sets associated with neuropsychiatric traits, including 'feeling worry', in cortical regions  
525 ( $p=1.68 \times 10^{-2}$  in DLPFC,  $p=8.04 \times 10^{-3}$  in dACC), and 'anxiety and stress-related disorders' in the  
526 MeA ( $p=1.72 \times 10^{-2}$ ) (**Figure 1E**). Moreover, stress-interactive variants differentially colocalized  
527 with PTSD GWAS loci; for example, in the BLA, stress-interactive eQTLs colocalized with PTSD  
528 GWAS variants around the *NUDT1* locus (PPH4=0.838), while baseline genetic regulation did not  
529 (PPH4=0.023) (**Figure 1F**), suggesting that PTSD risk at this locus is reflective of variants  
530 modified by traumatic stress.

531  
532 ***Stress-interactive variants lie in stress-related transcription factor binding domains.***

533 To mechanistically examine how stress-interactive eQTLs confer genotype-dependent  
534 regulation of stress encoding (**Figure 2A**), unbiased enrichment of stress-interactive eQTLs  
535 compared to base eQTLs in known transcription factor binding sites was performed. 30, 52, 54,  
536 and 83 out of 1188 motifs<sup>68</sup> were significantly enriched (binomial  $p < 0.05$ ) for stress-interactive  
537 eQTLs relative to base eQTLs in the BLA, dACC, DLPFC, and MeA, respectively (**Table S3**).  
538 Significantly enriched transcription factors included effectors of glucocorticoid-mediated stress<sup>69,70</sup>  
539 such as NFkB (BLA  $p=1.37 \times 10^{-4}$ , DLPFC  $p=4.3 \times 10^{-3}$ ) and GR (BLA  $p=1.31 \times 10^{-3}$ , DLPFC  
540  $p=4.5 \times 10^{-2}$ ), and also included transcription factors mediating PTSD diagnosis-dependent  
541 transcriptional hypersensitivity to glucocorticoids in iGLUTs<sup>31</sup>: YY1 ( $p=3.3 \times 10^{-2}$ ) and MYC  
542 ( $p=4.75 \times 10^{-2}$ ) in the DLPFC (**Figure 2F**). Together, this suggests that stress-interactive eQTLs  
543 exert genotype-dependent response to traumatic stress due to their position in stress-relevant  
544 transcription factor binding sites.

545  
546 ***Genetic regulation of glucocorticoid-mediated stress in vitro replicates molecular***  
547 ***mechanisms of stress encoding in the post-mortem brain***

548 As post-mortem brain findings may be confounded by diverse lifetime experiences and  
549 heterogeneity of traumatic exposures, our findings were validated using an *in vitro* model of stress  
550 exposure, whereby donor-matched hiPSC-derived neurons from PTSD cases and controls (n=39)  
551 are treated with hCort<sup>31</sup> (0 nM, 100 nM, and 1000 nM) (**Figure 3A**). We focused on glutamatergic  
552 and GABAergic cell types, as they are highly implicated in PTSD<sup>71-73</sup>; these cell types were  
553 generated via transient overexpression of *NGN2* in hiPSCs to yield iGLUT neurons (typically  
554 >95% yield and functionally mature by day 21-28<sup>49,51,74-77</sup>) or transient overexpression of *ASCL1*  
555 and *DLX2* to yield iGABA neurons (typically >80% yield and functionally mature by day 35-42<sup>49,77</sup>)  
556 (**S. Figure 4**).

557 We define **hCort-interactive eGenes** as those with neuronal context-specific regulation  
558 *in vitro*. 41-50% of trauma-interactive eGenes in the post-mortem brain were also identified as  
559 hCort-interactive eGenes *in vitro* (**Figure 3B**) (e.g., rs13331770, MeA p=9.16e-6, iGABA p=5.28e-  
560 4, **Figure 3D**); the majority of these overlapping eGenes are stress-interactive in either iGABA or  
561 iGLUT cells. (**Figure 3C**). These eGenes show enrichments across inflammatory,  
562 neuropsychiatric, and metabolic pathways (**Figure 3D**) that are both shared (e.g., response to  
563 antidepressants, iGLUT p=6.32x10<sup>-3</sup>, iGABA p=9.72x10<sup>-3</sup>) and distinct (e.g., neurotransmitter  
564 receptor transport, iGLUT p=0.235, iGABA p=4.31x10<sup>-3</sup>) across cell types (**Figure 3D**).

565 Many hCort-interactive eGenes (*RPS23*, *CTNNB1*, *GLIPR1L2*, *S100A10*, and *FAM85B*)  
566 showed distinct eQTL regulatory architecture at baseline compared to following glucocorticoid  
567 exposure (PPH3>0.5; **Figure 3E**, **S. Figure 6**). For example, two distinct SNPs associated with  
568 *RPS23* expression; the lead SNP (rs1354123) regulating *RPS23* expression in the presence of  
569 hCort-mediated stress lies in a YY1 transcription factor binding site, while the lead SNP  
570 (rs111772743) at baseline does not (**Figure 3F**). We previously identified YY1 targets as enriched  
571 for glucocorticoid-hypersensitivity in PTSD cases<sup>31</sup>, and here identified YY1 binding sites as  
572 enriched for stress-eQTLs compared to base-eQTLs in the post-mortem DLPFC (**Figure 2F**);  
573 consistent with this, shRNA-mediated knockdown of YY1 (**Figure 3G**) reduced the sensitivity of  
574 hCort-responsive genes to hCort (**Figure 2H**), suggesting that YY1 mediates glucocorticoid-  
575 dependent transcriptomic responses. This was likewise true for MYC, which we previously  
576 implicated in PTSD-mediated hyper-responsivity<sup>31</sup> (**S. Figure 6C**).

577 Stress-interactive eGenes shared between hiPSC-derived neurons and the post-mortem  
578 brain (by functional annotation of lead eQTLs in known GR binding sites and iGLUT open  
579 chromatin<sup>78</sup>) were repressed in a single cell CRISPR-inhibition screen<sup>79</sup>. hCort-dependent activity  
580 of putative regulatory elements, such as the rs34342567 SNP, conferred positive regulatory  
581 activity of the *TUBB1* gene only with hCort exposure (interaction p=1.8x10<sup>-2</sup>), suggesting this site



582 mediates hCort hyper-responsivity (**Figure 3I**).

583

### 584 ***Glial and endothelial cells are enriched for genotype-dependent stress response***

585 Given the cell type-specificity of transcriptomic response to glucocorticoid-mediated stress  
586 in hiPSC-derived neurons, we next considered whether bulk tissue eQTLs were driven by cell  
587 type-specific regulation. To do this, cell-type-specific gene expression in post-mortem tissues was  
588 deconvoluted from bulk expression, then base and trauma-interactive eQTL analyses were  
589 repeated across seven deconvoluted brain cell types: astrocytes, endothelial cells, excitatory  
590 neurons, inhibitory neurons, microglia, oligodendrocytes, and other neurons (not strictly inhibitory  
591 or excitatory) (**Figure 4A, S. Figure 3C**). Many imputed excitatory and inhibitory neuronal stress-  
592 interactive eGenes from the post-mortem brain were replicated hiPSC-derived hCort-interactive  
593 eGenes; inhibitory neurons demonstrated greater replication (44.7-52.9% overlap) compared to  
594 excitatory neurons (26.8-34.6% overlap) (**Figure 4B**). Stress-interactive eGenes identified in both  
595 excitatory neurons and iGLUT neurons enriched in regulatory pathways (i.e. regulation of protein  
596 folding,  $p=5.22 \times 10^{-4}$ ) and oxidative stress pathways (response to oxidative stress,  $p=1.39 \times 10^{-3}$ ),  
597 while iGABA enrichments included hippocampal and limbic system development ( $p=3.55 \times 10^{-4}$   
598 and  $p=7.39 \times 10^{-4}$ , respectively), brain regions associated with fear encoding<sup>13,80</sup>, in addition to  
599 stress signaling ( $p=1.71 \times 10^{-3}$ ) (**Figure 4C**).

600 Cell type-deconvoluted base eQTLs largely replicate reported single-cell eQTLs, with 35%  
601 (microglial) to 62% (neuronal) overlap with previous reports<sup>81</sup> (**S. Figure 3D**). Across brain  
602 regions, 69.9%-77.4% of base eGenes were shared between more than one cell type, with 10.5%-  
603 11.9% of eGenes shared between all seven cell types, respectively. In contrast, in the MeA, only  
604 a single stress-interactive eGene was shared between all cell types (**Figure 4D, S. Figure 7**).

605 When cell types enriched for eQTL activity were considered relative to cell type proportion,  
606 the role of endothelial cells and microglia in both base and stress-interactive eGenes across all  
607 four brain regions was highlighted (i.e. microglia DLPFC base eGene enrichment  $p=2.987 \times 10^{-34}$ ).  
608 Inhibitory neurons were enriched only in stress-interactive eGenes in the MeA and BLA (i.e.  
609 inhibitory neurons BLA trauma eGene enrichment  $p=3.02 \times 10^{-3}$ ) and oligodendrocytes were  
610 enriched only in stress-interactive eGenes in the dACC and DLPFC (i.e. oligodendrocytes dACC  
611 trauma eGene enrichment  $p < 2.2 \times 10^{-16}$ ) (**Figure 4E**). When comparing stress-interactive eGenes  
612 to base eGenes, stress-eGenes were particularly enriched in oligodendrocytes in the dACC  
613 (enrichment ratio: 17.50), microglia in the BLA (enrichment ratio: 12.09), and endothelial cells in  
614 the dACC (enrichment ratio: 3.753) (**Figure 4E**). Stress-interactive eGenes in these regions  
615 enriched for key processes involved in myelination<sup>82</sup> (i.e. phosphatidic acid metabolism in dACC

616 oligodendrocytes,  $p=5.84 \times 10^{-3}$ , positive regulation of myelination in DLPFC endothelial cells,  $p=$   
617  $1.88 \times 10^{-2}$ ) and blood brain barrier permeability<sup>83,84</sup> (i.e. IL6 production in BLA microglia,  
618  $p=1.74 \times 10^{-2}$ , heparan sulfate metabolism in DLPFC endothelial cells,  $p=1.88 \times 10^{-2}$ ) (**Figure 4G**),  
619 suggesting that these cell types and processes may underlie regional specificity of genotype-  
620 dependent stress encoding.

621 To assess whether stress-interactive eQTLs in bulk post-mortem brain tissue might  
622 represent a linear aggregation of cell type-specific stress response, we determined the effect  
623 sizes for the most significant stress-interactive eQTL for each eGene, in each cell type for which  
624 the SNP was a significant stress-interactive eQTL. For 47.5% of stress-interactive eGenes, the  
625 top eQTL in bulk tissue was more significant than in each deconvoluted cell type (e.g. *DSC1*,  
626 **Figure 4F**). In such cases, the effect size of the bulk eQTL often represented a linear combination  
627 of several cell types (e.g. *NEK2* for astrocytes and endothelial cells). In the remainder of cases,  
628 there was evidence of cell-type-specific drivers (e.g. *CCDC27* showed a significant stress-  
629 interactive effect in the same direction as the bulk DLPFC in excitatory neurons, but opposing  
630 direction in microglia, **Figure 4F**). Notably, the cell type with the most significant trauma-  
631 interactive eQTL was largely not the cell type with the largest cell fraction.

632

### 633 ***Genotype-dependent stress encoding implicates novel risk genes across neuropsychiatric*** 634 ***disorders***

635 We derived novel dynamic transcriptomic imputation (dTI) models capable of predicting  
636 environmentally dynamic genetically regulated gene expression (GxE-REx) by incorporating  
637 genotype-stress interactions across all four postmortem brain regions. These dTI models may be  
638 used to predict baseline genetically regulated gene expression (GREx for 11,473-11,965 genes  
639 across brain regions, validation  $R^2=0.43, 0.44, 0.49, 0.46$  for BLA, dACC, DLPFC, MeA,  
640 respectively) and stress-interactive genetically regulated gene expression (GxE-Rex for 11,268-  
641 11,841 genes across brain regions, validation  $R^2=0.45, 0.45, 0.49, 0.46$ ) (**Figure 5A, S. Figure**  
642 **8A**). Each set of models predicted a subset of genes more accurately (i.e. in the DLPFC, 5,875  
643 genes were predicted more accurately in the stress-interactive model and 6,996 genes were  
644 predicted more accurately in the base model) (**Figure 5B**).

645 Traumatic stress exacerbates risk for neuropsychiatric disorders beyond PTSD.  
646 application of these novel stress-interactive models to 12 neuropsychiatric disorders in the UK  
647 Biobank ( $n=157,322$ ) and Mount Sinai BioMe Biobank ( $n=28,250$ ) (**Figure 5A**) identified 124  
648 novel psychiatric and 15 novel neurodegenerative GxE-REx associations; the implication is that  
649 these genes confer risk only in the context of traumatic stress (**Figure 5D**). For example, nine



650 genes were identified with significant associations ( $p < 1 \times 10^{-5}$ ) between predicted BLA GxE-REx  
651 and PTSD case/control status only when accounting for traumatic stress (*GABPB2*, *SLC23A1*,  
652 *AL449209.1*, *GYPB*, *P4HA2*, *PVRIG*, *GARNL3*, *TRMT112*, *ETFA*); no associations were  
653 identified using the base models (**Figure 5C**). In Alzheimer's disease (AD), the BLA base model  
654 identified seven AD-associated genes (*DTX1*, *C3orf37*, *MEX3C*, *INPP1*, *USP32*, *YPEL2*, *SENP3*)  
655 while the stress-aware model identified six additional genes (*OR52N4*, *UBXN2B*, *TDGF1*, *RBBP6*,  
656 *CBX3*, *C1orf65*) (**S. Figure 8B**).

657 Novel brain disorder-associated genes identified by stress-interactive models were  
658 enriched in pathways associated previously with stress-dependent disorder risk, such as N-  
659 acetylneuraminate catabolism in Alzheimer's disease ( $p = 4.48 \times 10^{-3}$ ), previously implicated in  
660 immune-mediated memory deficits<sup>85</sup>, nutrient absorption and metabolism (vitamin  
661 transmembrane transport,  $p = 1.49 \times 10^{-2}$ , lipid digestion,  $p = 1.56 \times 10^{-2}$ ) in anorexia nervosa, synaptic  
662 transmission (L-glutamate import,  $p = 3.5 \times 10^{-3}$ , presynaptic vesicle fusion,  $p = 1.81 \times 10^{-2}$ ) in ADHD<sup>86</sup>,  
663 and sensory perception of pain<sup>87</sup> in PTSD<sup>88</sup> ( $p = 6.66 \times 10^{-3}$ ) and chronic pain ( $p = 1.01 \times 10^{-2}$ ) (**Figure**  
664 **5E**).

665

## 666 DISCUSSION

667 We demonstrate genotype- and stress-dependent transcriptomic effects detectable long  
668 after an initial traumatic exposure. Prompted in part by our observation that hiPSC-derived  
669 neurons exhibit intrinsic differential transcriptomic susceptibility to glucocorticoid-induced stress<sup>31</sup>,  
670 we examined the genotypic contribution to differential transcriptional encoding of traumatic stress.  
671 Common genetic variants that alter transcriptional responses to traumatic stress were identified  
672 in post-mortem brains ( $n = 304$ ) and were replicated in an hiPSC-derived neuronal model of  
673 glucocorticoid exposure ( $n = 40$ ), indicating together not only that neuronal stress responses are  
674 consistent between *in vivo* and *in vitro* paradigms, but also seemingly conserved across  
675 neurodevelopment. Without consideration of stress, genotype did not explain variance in  
676 expression of stress-interactive eGenes (i.e. rs11586632,  $p = 0.11$ , **Figure 1D**); it is only when  
677 considering both genotype and traumatic burden that the eQTL effect emerges (interaction  
678  $p = 3.11 \times 10^{-6}$ , **Figure 1B**), demonstrating regulation of gene expression in a genotype- and stress-  
679 dependent manner. Findings in both cohorts converged on variants lying in transcription factor  
680 binding sites, such as GR, NFkB, and YY1. Genotype-dependent transcriptional responses to  
681 stress were cell type- and brain region-specific, implicating GABAergic pathways of memory  
682 consolidation and novel oligodendrocyte, microglial, and endothelial contributions to blood brain  
683 barrier integrity and myelination. Moreover, this genetically regulated response to traumatic stress

684 is relevant across neuropsychiatric disorders, implicating genes involved in immune, metabolic,  
685 blood brain barrier and synaptic mechanisms.

686 GWAS have examined the complex genetic risk architecture underlying PTSD, most  
687 recently identifying 81 loci significantly associated with risk across the genome<sup>89</sup>, explaining only  
688 5.32% of heritability<sup>89</sup>, consistent with a modification of genetic risk by environmental exposures  
689 (e.g., stress)<sup>90</sup>. Likewise, post-mortem brain studies (e.g. *ELFN1*)<sup>42,73</sup> and transcription-wide  
690 association studies (TWAS) (e.g. *SNRNP35*)<sup>91</sup> identify genes associated with PTSD at baseline.  
691 Here, *in vivo* and *in vitro* approaches indicate that convergent mechanisms underlie long-term  
692 encoding of stress exposure. The modification of YY1 transcription factor binding sites by variants  
693 conferring genotype-dependent stress response, combined with the blunting of glucocorticoid-  
694 mediated transcriptional response via knockdown of YY1, suggest that it is a causal mediator of  
695 differential molecular responses to stress. Towards this, YY1 is a crucial factor in the development  
696 and function of the central nervous system<sup>92</sup> known to play a role in stress-sensitivity<sup>93</sup>. Functional  
697 disruption of a YY1 binding site by the ADHD-associated SNP rs2271338 mediates genotype-  
698 dependent neurodevelopmental impacts via downregulation of the ADGRL3 gene<sup>94</sup>; consistent  
699 with YY1 underlying hyper-responsivity of gene targets in PTSD to glucocorticoid-induced  
700 stress<sup>31</sup>.

701 Non-neuronal cells, particularly microglia, endothelial cells, and oligodendrocytes, were  
702 enriched for genotype-dependent molecular encoding of stress, consistent with the neuroimmune  
703 hypothesis of stress-related brain adaptations. Moreover, blood brain barrier integrity, a known  
704 mediator of cognition that when disrupted is associated with cognitive decline<sup>95</sup>, may also  
705 contribute to genotype-dependent stress response<sup>96</sup>. Genotype-dependent stress-induced  
706 disruption to blood brain barrier permeability may mediate stress-induced cognitive decline across  
707 neuropsychiatric disorders.

708 Given that the major measure of traumatic stress exposure used herein was cumulative  
709 trauma burden, summing each traumatic experience across the lifespan, a limitation of our  
710 analysis is the equal weighting of diverse stressors known to impart different risks for PTSD (i.e.,  
711 witnessing an accident confers lower risk for PTSD compared to interpersonal traumas such as  
712 sexual violence<sup>97</sup>, but are nonetheless weighted equally in this analysis). Likewise, cumulative  
713 trauma burden does not discriminate between temporal exposures to traumatic stress (i.e.,  
714 childhood vs adulthood exposures<sup>98</sup>, or chronic vs acute stress<sup>99</sup>) that are known to differentially  
715 contribute to PTSD susceptibility, suggesting differential molecular encoding during critical  
716 periods. In the future, weighting and partitioning traumas based on type and severity, coupled  
717 with differentiating between childhood and adulthood exposures, may elucidate unique encoding

718 mechanisms for specific types of traumas. Our analyses assumed that multiple traumas linearly  
719 impact molecular response, but trauma burden may in fact confer a nonlinear effect<sup>7,100</sup>. Studies  
720 examining the subjective experience of trauma are necessary to discern these biological  
721 consequences.

722 hiPSC-derived models present substantial advantages in that they model the impact of a  
723 controlled biological stressor, therefore permitting isogenic comparisons of pre- and post-stress  
724 states of transcriptomic regulation. This allows for assessment of causal glucocorticoid-induced  
725 regulatory changes, rather than associations confounded by diverse lifetime experiences and  
726 varied donor genetic backgrounds. Nonetheless, they are limited in that they model only a single  
727 aspect of stress, without consideration of other physiological mediators (e.g., catecholamine  
728 reactivity<sup>101</sup>, sympathetic cholinergic activation<sup>102</sup>, and pro-inflammatory cytokines<sup>103</sup>). Moreover,  
729 the glucocorticoid-stimulated neurons studied herein approximate acute encoding of stress,  
730 whereas post-mortem brain signatures likely also embody aspects of recovery and response to  
731 stress. *In vitro* experiments assessing acute stress withdrawal may distinguish encoding of stress  
732 exposure from encoding of stress recovery.

733 Assessed in their natural contexts, the effects of genetic variants may have been  
734 confounded by other variants in high linkage disequilibrium, potentially obscuring true causal  
735 variants. Massively parallel reporter assays<sup>104,105</sup> (MPRAs) applied to assess allele-dependent  
736 transcriptional activity under glucocorticoid exposure contexts<sup>106</sup> could empirically resolve true  
737 causal variants underlying genotype-dependent stress encoding. Likewise, expansion of CRISPR  
738 screens of non-coding variants (e.g., CRISPR-QTL<sup>107</sup>) and/or analysis of pools of dozens of  
739 donors (e.g., village-in-a-dish<sup>108</sup>) may pinpoint putative enhancers with stress-dependent  
740 regulatory activity and reveal their downstream target genes.

741 While traditional functional annotation of brain (or neuropsychiatric) disorder-associated  
742 variants does not account for environmental impacts<sup>109</sup>, here we demonstrate that eQTLs are  
743 sensitive to environmental interactions. Thus, genetics-only approaches to brain disorder biology  
744 fail to capture regulatory mechanisms associated with risk under certain environmental contexts,  
745 missing important disorder-associated variants, genes, and pathways. Integrating environmental  
746 interactions across a variety of brain disorder-associated contexts to eQTL studies and their  
747 application to functionally annotate GWAS variants will likely uncover novel pathways of gene x  
748 environment interactions essential to brain disorder biology, informing mechanisms by which the  
749 impact of genetic risk can be modified. These pathways are likely to have clear translational value  
750 in diagnosing, preventing, or treating disease. First, future polygenic risk scores should include  
751 environmental measures of traumatic stress to stratify high-risk individuals more accurately.

752 Second, interventions aimed at reducing neuropsychiatric risk should consider mitigating the  
753 exposure to and impact of traumatic experiences on particularly vulnerable individuals. Given that  
754 diverse environmental exposures may have distinct molecular encoding effects, we urge  
755 expansion of this work to broadly consider all gene x environment interactions linked to brain  
756 disorder diagnosis and outcomes (e.g., infection, toxins, drugs of addiction, medications), to better  
757 understand disorder incidence and treatment response.

758 Biological vulnerability to stress is dependent on both inherent genotype and the extent of  
759 traumatic exposure. Variants conferring differential susceptibility to traumatic stress likely broadly  
760 confer neuropsychiatric disorder risk far beyond PTSD, necessitating consideration of the impact  
761 of lifetime trauma across brain traits, disorders, and diseases. The cross-disorder relevance of  
762 stress-interactive variants underscores the importance of collecting detailed trauma histories  
763 clinically, even in patients not deemed otherwise biologically vulnerable, as traumatic stress may  
764 confer risk through novel mechanisms. Finally, if stress and trauma indeed result in long-term  
765 encoding of cross-disorder risk, this suggests a convergent point of therapeutic intervention to  
766 increase resilience, improve brain health, and prevent disease.

#### 767 **Supplemental Author List**

768 NYSCF Global Array Team: Lauren Bauer, Katie Brenner, Geoff Buckley-Herd, Sean  
769 DesMarteau, Patrick Fenton, Peter Ferrarotto, Jenna Hall, Selwyn Jacob, Travis Kroeker,  
770 Gregory Lallos, Hector Martinez, Paul McCoy, Frederick J. Monsma, Dorota Moroziewicz, Reid  
771 Otto, Kathryn Reggio, Bruce Sun, Rebecca Tibbets, Dong Woo Shin, Hongyan Zhou & Matthew  
772 Zimmer

773 Traumatic Stress Brain Research Group: Victor E. Alvarez, David Benedek, Alicia Che, Dianne  
774 A. Cruz, David A. Davis, Matthew J. Girgenti, Ellen Hoffman, Paul E. Holtzheimer, Bertrand R.  
775 Huber, Alfred Kaye, John H. Krystal, Adam T. Labadorf, Terence M. Keane, Mark W. Logue,  
776 Ann McKee, Brian Marx, Mark W. Miller, Crystal Noller, Janitza Montalvo-Ortiz, Meghan Pierce,  
777 William K. Scott, Paula Schnurr, Krista DiSano, Thor Stein, Robert Ursano, Douglas E.  
778 Williamson, Erika J. Wolf, Keith A. Young, PhD

#### 779 **FUNDING**

780 DOD W81XWH-15-1-0706 (R.Y.), R01ES033630 (K.J.B, L.H.), R01MH124839 (L.H.);  
781 R01MH118278 (L.H.), F30MH132324-01A1 (C.S.), F31MH130122 (K.T.); RM1MH132648  
782 (L.H), R01MH125938 (L.H)

783 **AUTHOR CONTRIBUTIONS**

784 Study conception was provided by L.M.H, K.J.B, and C.S. Neuronal generation and modeling  
785 was provided by P.J.M.D, T.R., B.M, S.D, J.G, S.A.N, D.P. Data analysis and/or code was  
786 provided by C.S, R.S, E.M.H, H.Y, A.C, K.T, C.X. All authors interrelated data and critically  
787 revised the manuscript for important intellectual content. hiPSC cohort data and specimen  
788 collections were carried out by H.B. and R.Y. Post-mortem cohort data and specimen  
789 collections were carried out by M.J.G, J.H.K, P.E.H, K.A.Y, D.B. All authors wrote and approved  
790 the final manuscript.

791

792 **ACKNOWLEDGEMENTS**

793

794 This work was supported in part through the computational and data resources and staff expertise  
795 provided by Scientific Computing and Data at the Icahn School of Medicine at Mount Sinai and  
796 supported by the Clinical and Translational Science Awards (CTSA) grant UL1TR004419 from  
797 the National Center for Advancing Translational Sciences. Research reported in this publication  
798 was also supported by the Office of Research Infrastructure of the National Institutes of Health  
799 under award number S10OD026880 and S10OD030463. The content is solely the responsibility  
800 of the authors and does not necessarily represent the official views of the National Institutes of  
801 Health. This work was supported with resources and use of facilities at the VA Connecticut Health  
802 Care System, West Haven, CT. This work was funded in part by the State of Connecticut,  
803 Department of Mental Health and Addiction Services. The views expressed here are those of the  
804 authors and do not necessarily reflect the position or policy of the US Department of Veterans  
805 Affairs (VA) or the U.S. government or the views of the Department of Mental Health and Addiction  
806 Services or the State of Connecticut.

807

808 **REFERENCES**

- 809 1. McFARLANE, A. C. The long-term costs of traumatic stress: intertwined physical and  
810 psychological consequences. *World Psychiatry* **9**, 3–10 (2010).
- 811 2. Breslau, N., Davis, G. C., Peterson, E. L. & Schultz, L. R. A second look at comorbidity in  
812 victims of trauma: the posttraumatic stress disorder–major depression connection. *Biol.*  
813 *Psychiatry* **48**, 902–909 (2000).

- 814 3. Breslau, N., Davis, G. C. & Schultz, L. R. Posttraumatic Stress Disorder and the Incidence  
815 of Nicotine, Alcohol, and Other Drug Disorders in Persons Who Have Experienced Trauma.  
816 *Arch. Gen. Psychiatry* **60**, 289–294 (2003).
- 817 4. McLaughlin, K. A. *et al.* Childhood Adversities and First Onset of Psychiatric Disorders in a  
818 National Sample of US Adolescents. *Arch. Gen. Psychiatry* **69**, 1151–1160 (2012).
- 819 5. LeMoult, J. *et al.* Meta-analysis: Exposure to Early Life Stress and Risk for Depression in  
820 Childhood and Adolescence. *J. Am. Acad. Child Adolesc. Psychiatry* **59**, 842–855 (2020).
- 821 6. Aas, M. *et al.* The role of childhood trauma in bipolar disorders. *Int. J. Bipolar Disord.* **4**, 2  
822 (2016).
- 823 7. Marchese, S. & Huckins, L. M. Trauma Matters: Integrating Genetic and Environmental  
824 Components of PTSD. *Adv. Genet. Hoboken NJ* **4**, 2200017 (2023).
- 825 8. Justice, N. J. The relationship between stress and Alzheimer’s disease. *Neurobiol. Stress* **8**,  
826 127–133 (2018).
- 827 9. Popovic, D. *et al.* Childhood Trauma in Schizophrenia: Current Findings and Research  
828 Perspectives. *Front. Neurosci.* **13**, 274 (2019).
- 829 10. Tagay, S., Schlottbohm, E., Reyes-Rodriguez, M. L., Repic, N. & Senf, W. Eating Disorders,  
830 Trauma, PTSD and Psychosocial Resources. *Eat. Disord.* **22**, 33–49 (2014).
- 831 11. Hoppen, T. H. & Morina, N. The prevalence of PTSD and major depression in the global  
832 population of adult war survivors: a meta-analytically informed estimate in absolute  
833 numbers. *Eur. J. Psychotraumatology* **10**, 1578637 (2019).
- 834 12. Feder, A., Nestler, E. J. & Charney, D. S. Psychobiology and molecular genetics of  
835 resilience. *Nat. Rev. Neurosci.* **10**, 446–457 (2009).
- 836 13. Bremner, J. D. Traumatic stress: effects on the brain. *Dialogues Clin. Neurosci.* **8**, 445  
837 (2006).

- 838 14. Finsterwald, C. & Alberini, C. M. Stress and glucocorticoid receptor-dependent mechanisms  
839 in long-term memory: from adaptive responses to psychopathologies. *Neurobiol. Learn.*  
840 *Mem.* **0**, 17–29 (2014).
- 841 15. Laine, M. A. & Shansky, R. M. Rodent models of stress and dendritic plasticity –  
842 Implications for psychopathology. *Neurobiol. Stress* **17**, 100438 (2022).
- 843 16. Russo, S. J., Murrough, J. W., Han, M.-H., Charney, D. S. & Nestler, E. J. Neurobiology of  
844 resilience. *Nat. Neurosci.* **15**, 1475–1484 (2012).
- 845 17. Goldwater, D. S. *et al.* Structural and functional alterations to rat medial prefrontal cortex  
846 following chronic restraint stress and recovery. *Neuroscience* **164**, 798–808 (2009).
- 847 18. Chang, C. & Grace, A. A. Amygdala-Ventral Pallidum Pathway Decreases Dopamine  
848 Activity After Chronic Mild Stress in Rats. *Biol. Psychiatry* **76**, 223–230 (2014).
- 849 19. Liston, C. *et al.* Stress-induced alterations in prefrontal cortical dendritic morphology predict  
850 selective impairments in perceptual attentional set-shifting. *J. Neurosci.* **26**, 7870–7874  
851 (2006).
- 852 20. Liston, C. & Gan, W. B. Glucocorticoids are critical regulators of dendritic spine  
853 development and plasticity in vivo. *Proc Natl Acad Sci USA* **108**, (2011).
- 854 21. Peña, C. J. *et al.* Early life stress alters transcriptomic patterning across reward circuitry in  
855 male and female mice. *Nat. Commun.* **10**, 5098 (2019).
- 856 22. Smoller, J. W. The Genetics of Stress-Related Disorders: PTSD, Depression, and Anxiety  
857 Disorders. *Neuropsychopharmacology* **41**, 297–319 (2016).
- 858 23. Caspi, A. *et al.* Influence of life stress on depression: moderation by a polymorphism in the  
859 5-HTT gene. *Science* **301**, 386–389 (2003).
- 860 24. Caspi, A. *et al.* Role of genotype in the cycle of violence in maltreated children. *Science*  
861 **297**, 851–854 (2002).



- 862 25. Binder, E. B. *et al.* Polymorphisms in FKBP5 are associated with increased recurrence of  
863 depressive episodes and rapid response to antidepressant treatment. *Nat. Genet.* **36**,  
864 1319–1325 (2004).
- 865 26. Binder, E. B. *et al.* Association of FKBP5 polymorphisms and childhood abuse with risk of  
866 posttraumatic stress disorder symptoms in adults. *JAMA* **299**, 1291–1305 (2008).
- 867 27. Fani, N. *et al.* FKBP5 and attention bias for threat: associations with hippocampal function  
868 and shape. *JAMA Psychiatry* **70**, 392–400 (2013).
- 869 28. Klengel, T. *et al.* Allele-specific FKBP5 DNA demethylation mediates gene–childhood  
870 trauma interactions. *Nat. Neurosci.* **16**, 33–41 (2013).
- 871 29. Elbau, I. G., Cruceanu, C. & Binder, E. B. Genetics of Resilience: Gene-by-Environment  
872 Interaction Studies as a Tool to Dissect Mechanisms of Resilience. *Biol. Psychiatry* **86**, 433–  
873 442 (2019).
- 874 30. DePierro, J., Lepow, L., Feder, A. & Yehuda, R. Translating Molecular and Neuroendocrine  
875 Findings in Posttraumatic Stress Disorder and Resilience to Novel Therapies. *Biol.*  
876 *Psychiatry* **86**, 454–463 (2019).
- 877 31. Seah, C. *et al.* Modeling gene × environment interactions in PTSD using human neurons  
878 reveals diagnosis-specific glucocorticoid-induced gene expression. *Nat. Neurosci.* **25**,  
879 1434–1445 (2022).
- 880 32. Fu, J. *et al.* Unraveling the Regulatory Mechanisms Underlying Tissue-Dependent Genetic  
881 Variation of Gene Expression. *PLOS Genet.* **8**, e1002431 (2012).
- 882 33. Aguet, F. *et al.* Genetic effects on gene expression across human tissues. *Nature* **550**, 204–  
883 213 (2017).
- 884 34. Moore, S. R. *et al.* Sex differences in the genetic regulation of the blood transcriptome  
885 response to glucocorticoid receptor activation. 2020.10.19.20213983  
886 <https://www.medrxiv.org/content/10.1101/2020.10.19.20213983v3> (2021)  
887 doi:10.1101/2020.10.19.20213983.



- 888 35. Yao, C. *et al.* Sex- and age-interacting eQTLs in human complex diseases. *Hum. Mol.*  
889 *Genet.* **23**, 1947–1956 (2014).
- 890 36. Lindén, M. *et al.* Sex influences eQTL effects of SLE and Sjögren’s syndrome-associated  
891 genetic polymorphisms. *Biol. Sex Differ.* **8**, 34 (2017).
- 892 37. Werling, D. M. *et al.* Whole-Genome and RNA Sequencing Reveal Variation and  
893 Transcriptomic Coordination in the Developing Human Prefrontal Cortex. *Cell Rep.* **31**,  
894 107489 (2020).
- 895 38. Cuomo, A. S. E. *et al.* Single-cell RNA-sequencing of differentiating iPS cells reveals  
896 dynamic genetic effects on gene expression. *Nat. Commun.* **11**, 810 (2020).
- 897 39. Knowles, D. A. *et al.* Determining the genetic basis of anthracycline-cardiotoxicity by  
898 molecular response QTL mapping in induced cardiomyocytes. *eLife* **7**, e33480 (2018).
- 899 40. Nakagawa, S. *et al.* Effects of post-traumatic growth on the dorsolateral prefrontal cortex  
900 after a disaster. *Sci. Rep.* **6**, 34364 (2016).
- 901 41. Alexandra Kredlow, M., Fenster, R. J., Laurent, E. S., Ressler, K. J. & Phelps, E. A.  
902 Prefrontal cortex, amygdala, and threat processing: implications for PTSD.  
903 *Neuropsychopharmacology* **47**, 247–259 (2022).
- 904 42. Jaffe, A. E. *et al.* Decoding Shared Versus Divergent Transcriptomic Signatures Across  
905 Cortico-Amygdala Circuitry in PTSD and Depressive Disorders. *Am. J. Psychiatry* **179**, 673–  
906 686 (2022).
- 907 43. Liberzon, I. & Sripada, C. S. The functional neuroanatomy of PTSD: a critical review. in  
908 *Progress in Brain Research* (eds. De Kloet, E. R., Oitzl, M. S. & Vermetten, E.) vol. 167  
909 151–169 (Elsevier, 2007).
- 910 44. Koek, R. J. *et al.* Deep brain stimulation of the basolateral amygdala for treatment-refractory  
911 combat post-traumatic stress disorder (PTSD): study protocol for a pilot randomized  
912 controlled trial with blinded, staggered onset of stimulation. *Trials* **15**, 356 (2014).

- 913 45. Zhang, H.-H. *et al.* Traumatic Stress Produces Delayed Alterations of Synaptic Plasticity in  
914 Basolateral Amygdala. *Front. Psychol.* **10**, 2394 (2019).
- 915 46. Huckins, L. M. *et al.* Polygenic regulation of PTSD severity and outcomes among World  
916 Trade Center responders. 2020.12.06.20244772  
917 <https://www.medrxiv.org/content/10.1101/2020.12.06.20244772v2> (2021)  
918 doi:10.1101/2020.12.06.20244772.
- 919 47. Huckins, L., Pietrzak, R., Yehuda, R., Stahl, E. & Feder, A. Genetic Regulation of PTSD and  
920 Resilience Among World Trade Center Responders. *Biol. Psychiatry* **87**, S26 (2020).
- 921 48. Marchese, S. *et al.* Altered gene expression and PTSD symptom dimensions in World Trade  
922 Center responders. *Mol. Psychiatry* **27**, 2225–2246 (2022).
- 923 49. Barretto, N. *et al.* ASCL1- and DLX2-induced GABAergic neurons from hiPSC-derived  
924 NPCs. *J. Neurosci. Methods* **334**, 108548 (2020).
- 925 50. Lonsdale, J. *et al.* The Genotype-Tissue Expression (GTEx) project. *Nat. Genet.* **45**, 580–  
926 585 (2013).
- 927 51. Schrode, N. *et al.* Synergistic effects of common schizophrenia risk variants. *Nat. Genet.* **51**,  
928 1475–1485 (2019).
- 929 52. DeBoever, C. *et al.* Large-Scale Profiling Reveals the Influence of Genetic Variation on  
930 Gene Expression in Human Induced Pluripotent Stem Cells. *Cell Stem Cell* **20**, 533-546.e7  
931 (2017).
- 932 53. Hoffman, G. E. *et al.* CommonMind Consortium provides transcriptomic and epigenomic  
933 data for Schizophrenia and Bipolar Disorder. *Sci. Data* **6**, 180 (2019).
- 934 54. Dobbyn, A. *et al.* Landscape of Conditional eQTL in Dorsolateral Prefrontal Cortex and Co-  
935 localization with Schizophrenia GWAS. *Am. J. Hum. Genet.* **102**, 1169–1184 (2018).
- 936 55. Giambartolomei, C. *et al.* Bayesian test for colocalisation between pairs of genetic  
937 association studies using summary statistics. *PLoS Genet.* **10**, e1004383 (2014).

- 938 56. Watanabe, K., Taskesen, E., van Bochoven, A. & Posthuma, D. Functional mapping and  
939 annotation of genetic associations with FUMA. *Nat. Commun.* **8**, 1826 (2017).
- 940 57. Newman, A. M. *et al.* Determining cell type abundance and expression from bulk tissues  
941 with digital cytometry. *Nat. Biotechnol.* **37**, 773–782 (2019).
- 942 58. Darmanis, S. *et al.* A survey of human brain transcriptome diversity at the single cell level.  
943 *Proc. Natl. Acad. Sci. U. S. A.* **112**, 7285–7290 (2015).
- 944 59. Lake, B. B. *et al.* Neuronal subtypes and diversity revealed by single-nucleus RNA  
945 sequencing of the human brain. *Science* **352**, 1586–1590 (2016).
- 946 60. Lake, B. B. *et al.* Integrative single-cell analysis of transcriptional and epigenetic states in  
947 the human adult brain. *Nat. Biotechnol.* **36**, 70–80 (2018).
- 948 61. Bayesian estimation of cell type-specific gene expression with prior derived from single-cell  
949 data - PubMed. <https://pubmed.ncbi.nlm.nih.gov/33837133/>.
- 950 62. Leek, J. T., Johnson, W. E., Parker, H. S., Jaffe, A. E. & Storey, J. D. The sva package for  
951 removing batch effects and other unwanted variation in high-throughput experiments.  
952 *Bioinforma. Oxf. Engl.* **28**, 882–883 (2012).
- 953 63. Ward, L. D. & Kellis, M. HaploReg v4: systematic mining of putative causal variants, cell  
954 types, regulators and target genes for human complex traits and disease. *Nucleic Acids*  
955 *Res.* **44**, D877–D881 (2016).
- 956 64. Bray, N. L., Pimentel, H., Melsted, P. & Pachter, L. Near-optimal probabilistic RNA-seq  
957 quantification. *Nat. Biotechnol.* **34**, 525–527 (2016).
- 958 65. Korsunsky, I. *et al.* Fast, sensitive and accurate integration of single-cell data with Harmony.  
959 *Nat. Methods* **16**, 1289–1296 (2019).
- 960 66. Friedman, J. H., Hastie, T. & Tibshirani, R. Regularization Paths for Generalized Linear  
961 Models via Coordinate Descent. *J. Stat. Softw.* **33**, 1–22 (2010).
- 962 67. Marchese, S., Cuddlestone, W., Seah, C., Johnson, J. & Huckins, L. M. Disentangling the  
963 roles of trauma and genetics in psychiatric disorders using an Electronic Health Records-

- 964 based approach. 2022.08.28.22279306 Preprint at  
965 <https://doi.org/10.1101/2022.08.28.22279306> (2022).
- 966 68. Kheradpour, P. & Kellis, M. Systematic discovery and characterization of regulatory motifs in  
967 ENCODE TF binding experiments. *Nucleic Acids Res.* **42**, 2976–2987 (2014).
- 968 69. Rao, N. A. S. *et al.* Coactivation of GR and NFkB alters the repertoire of their binding sites  
969 and target genes. *Genome Res.* **21**, 1404–1416 (2011).
- 970 70. Gray, J. D., Kogan, J. F., Marrocco, J. & McEwen, B. S. Genomic and epigenomic  
971 mechanisms of glucocorticoids in the brain. *Nat. Rev. Endocrinol.* **13**, 661–673 (2017).
- 972 71. Huang, J. *et al.* Involvement of the GABAergic system in PTSD and its therapeutic  
973 significance. *Front. Mol. Neurosci.* **16**, 1052288 (2023).
- 974 72. Daskalakis, N. P. Cell type-specific Dissection of PTSD and MDD in Human Post-Mortem  
975 DLPFC reveals genetic and glucocorticoid regulation. *Psychoneuroendocrinology* **131**,  
976 105547 (2021).
- 977 73. Girgenti, M. J. *et al.* Transcriptomic organization of the human brain in post-traumatic stress  
978 disorder. *Nat. Neurosci.* **24**, 24–33 (2021).
- 979 74. Ho, S. M. Rapid Ngn2-induction of excitatory neurons from hiPSC-derived neural progenitor  
980 cells. *Methods* **101**, (2016).
- 981 75. Zhang, Y. Rapid single-step induction of functional neurons from human pluripotent stem  
982 cells. *Neuron* **78**, (2013).
- 983 76. Flaherty, E. Neuronal impact of patient-specific aberrant NRXN1alpha splicing. *Nat Genet*  
984 **51**, (2019).
- 985 77. Yang, N. *et al.* Generation of pure GABAergic neurons by transcription factor programming.  
986 *Nat. Methods* **14**, 621–628 (2017).
- 987 78. Forrest, M. P. *et al.* Open Chromatin Profiling in hiPSC-Derived Neurons Prioritizes  
988 Functional Noncoding Psychiatric Risk Variants and Highlights Neurodevelopmental Loci.  
989 *Cell Stem Cell* **21**, 305-318.e8 (2017).

- 990 79. Chavez, A. *et al.* Highly-efficient Cas9-mediated transcriptional programming. *Nat. Methods*  
991 **12**, 326–328 (2015).
- 992 80. Gilbertson, M. W. *et al.* Smaller hippocampal volume predicts pathologic vulnerability to  
993 psychological trauma. *Nat. Neurosci.* **5**, 1242–1247 (2002).
- 994 81. Bryois, J. *et al.* Cell-type-specific cis-eQTLs in eight human brain cell types identify novel  
995 risk genes for psychiatric and neurological disorders. *Nat. Neurosci.* **25**, 1104–1112 (2022).
- 996 82. Nadra, K. *et al.* Phosphatidic acid mediates demyelination in Lpin1 mutant mice. *Genes*  
997 *Dev.* **22**, 1647–1661 (2008).
- 998 83. Blecharz-Lang, K. G. *et al.* Interleukin 6-Mediated Endothelial Barrier Disturbances Can Be  
999 Attenuated by Blockade of the IL6 Receptor Expressed in Brain Microvascular Endothelial  
1000 Cells. *Transl. Stroke Res.* **9**, 631–642 (2018).
- 1001 84. Joshi, B. S. & Zuhorn, I. S. Heparan sulfate proteoglycan-mediated dynamin-dependent  
1002 transport of neural stem cell exosomes in an in vitro blood-brain barrier model. *Eur. J.*  
1003 *Neurosci.* **53**, 706–719 (2021).
- 1004 85. Suzzi, S. *et al.* N-acetylneuraminic acid links immune exhaustion and accelerated memory  
1005 deficit in diet-induced obese Alzheimer’s disease mouse model. *Nat. Commun.* **14**, 1293  
1006 (2023).
- 1007 86. Maltezos, S. *et al.* Glutamate/glutamine and neuronal integrity in adults with ADHD: a proton  
1008 MRS study. *Transl. Psychiatry* **4**, e373 (2014).
- 1009 87. Johnston, K. J. A. & Huckins, L. M. Chronic Pain and Psychiatric Conditions. *Complex*  
1010 *Psychiatry* **9**, 24–43 (2022).
- 1011 88. Jenewein, J. *et al.* Altered Pain Perception and Fear-Learning Deficits in Subjects With  
1012 Posttraumatic Stress Disorder. *J. Pain Off. J. Am. Pain Soc.* **17**, 1325–1333 (2016).
- 1013 89. THE BRAINSTORM CONSORTIUM *et al.* Analysis of shared heritability in common  
1014 disorders of the brain. *Science* **360**, eaap8757 (2018).

- 1015 90. Hunter, D. J. Gene-environment interactions in human diseases. *Nat. Rev. Genet.* **6**, 287–  
1016 298 (2005).
- 1017 91. Huckins, L. M. *et al.* Analysis of Genetically Regulated Gene Expression Identifies a  
1018 Prefrontal PTSD Gene, SNRNP35, Specific to Military Cohorts. *Cell Rep.* **31**, 107716  
1019 (2020).
- 1020 92. Zurkirchen, L. *et al.* Yin Yang 1 sustains biosynthetic demands during brain development in  
1021 a stage-specific manner. *Nat. Commun.* **10**, 2192 (2019).
- 1022 93. Kwon, D. Y. *et al.* Neuronal Yin Yang1 in the prefrontal cortex regulates transcriptional and  
1023 behavioral responses to chronic stress in mice. *Nat. Commun.* **13**, 55 (2022).
- 1024 94. Martinez, A. F. *et al.* An Ultraconserved Brain-Specific Enhancer Within ADGRL3 (LPHN3)  
1025 Underpins Attention-Deficit/Hyperactivity Disorder Susceptibility. *Biol. Psychiatry* **80**, 943–  
1026 954 (2016).
- 1027 95. Nation, D. A. *et al.* Blood-brain barrier breakdown is an early biomarker of human cognitive  
1028 dysfunction. *Nat. Med.* **25**, 270–276 (2019).
- 1029 96. Iadecola, C. The Neurovascular Unit Coming of Age: A Journey through Neurovascular  
1030 Coupling in Health and Disease. *Neuron* **96**, 17–42 (2017).
- 1031 97. Yehuda, R. Post-traumatic stress disorder. *Nat Rev Primer* **1**, (2015).
- 1032 98. Cloitre, M. *et al.* A developmental approach to complex PTSD: Childhood and adult  
1033 cumulative trauma as predictors of symptom complexity. *J. Trauma. Stress* **22**, 399–408  
1034 (2009).
- 1035 99. Pratchett, L. C. & Yehuda, R. Foundations of posttraumatic stress disorder: Does early life  
1036 trauma lead to adult posttraumatic stress disorder? *Dev. Psychopathol.* **23**, 477–491 (2011).
- 1037 100. Yehuda, R. & LeDoux, J. Response Variation following Trauma: A Translational  
1038 Neuroscience Approach to Understanding PTSD. *Neuron* **56**, 19–32 (2007).
- 1039 101. Sah, R. & Geraciotti, T. Neuropeptide Y and posttraumatic stress disorder. *Mol.*  
1040 *Psychiatry* **18**, 646–655 (2013).

- 1041 102. Belkin, M. R. & Schwartz, T. L. Alpha-2 receptor agonists for the treatment of  
1042 posttraumatic stress disorder. *Drugs Context* **4**, 212286 (2015).
- 1043 103. Passos, I. C. *et al.* Inflammatory markers in post-traumatic stress disorder: a systematic  
1044 review, meta-analysis, and meta-regression. *Lancet Psychiatry* **2**, 1002–1012 (2015).
- 1045 104. Townsley, K. G., Brennand, K. J. & Huckins, L. M. Massively parallel techniques for  
1046 cataloging the regulome of the human brain. *Nat. Neurosci.* 1–13 (2020)  
1047 doi:10.1038/s41593-020-00740-1.
- 1048 105. McAfee, J. C. *et al.* Systematic investigation of allelic regulatory activity of  
1049 schizophrenia-associated common variants. *Cell Genomics* **3**, 100404 (2023).
- 1050 106. Seah, C., Huckins, L. M. & Brennand, K. J. Stem Cell Models for Context-Specific  
1051 Modeling in Psychiatric Disorders. *Biol. Psychiatry* **93**, 642–650 (2023).
- 1052 107. Gasperini, M. *et al.* A Genome-wide Framework for Mapping Gene Regulation via  
1053 Cellular Genetic Screens. *Cell* **176**, 377-390.e19 (2019).
- 1054 108. Neavin, D. R. *et al.* A village in a dish model system for population-scale hiPSC studies.  
1055 *Nat. Commun.* **14**, 3240 (2023).
- 1056 109. Young, H., Cote, A. & Huckins, L. M. Chapter 14 - Integration with systems biology  
1057 approaches and -omics data to characterize risk variation. in *Psychiatric Genomics* (eds.  
1058 Tsermpini, E. E., Alda, M. & Patrinos, G. P.) 289–315 (Academic Press, 2022).  
1059 doi:10.1016/B978-0-12-819602-1.00017-6.

1060

1061

1062 **FIGURES**

1063 **Graphical Abstract**

### Graphical Abstract

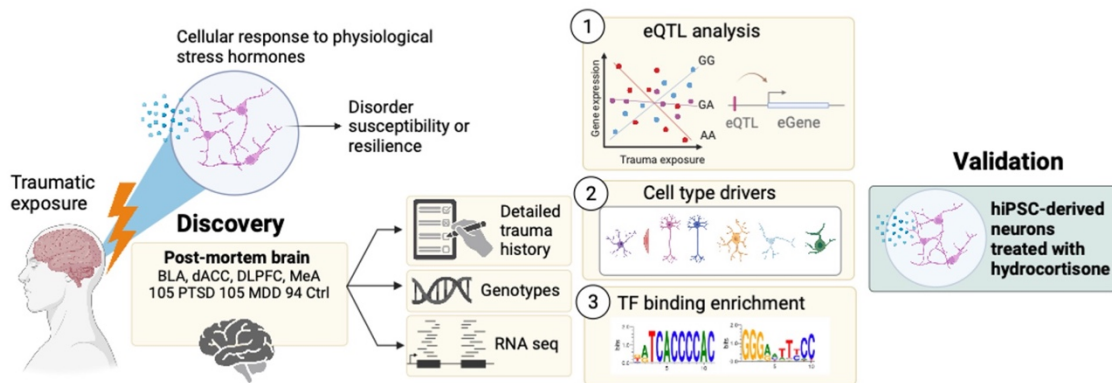

1064



1065 **Figure 1**

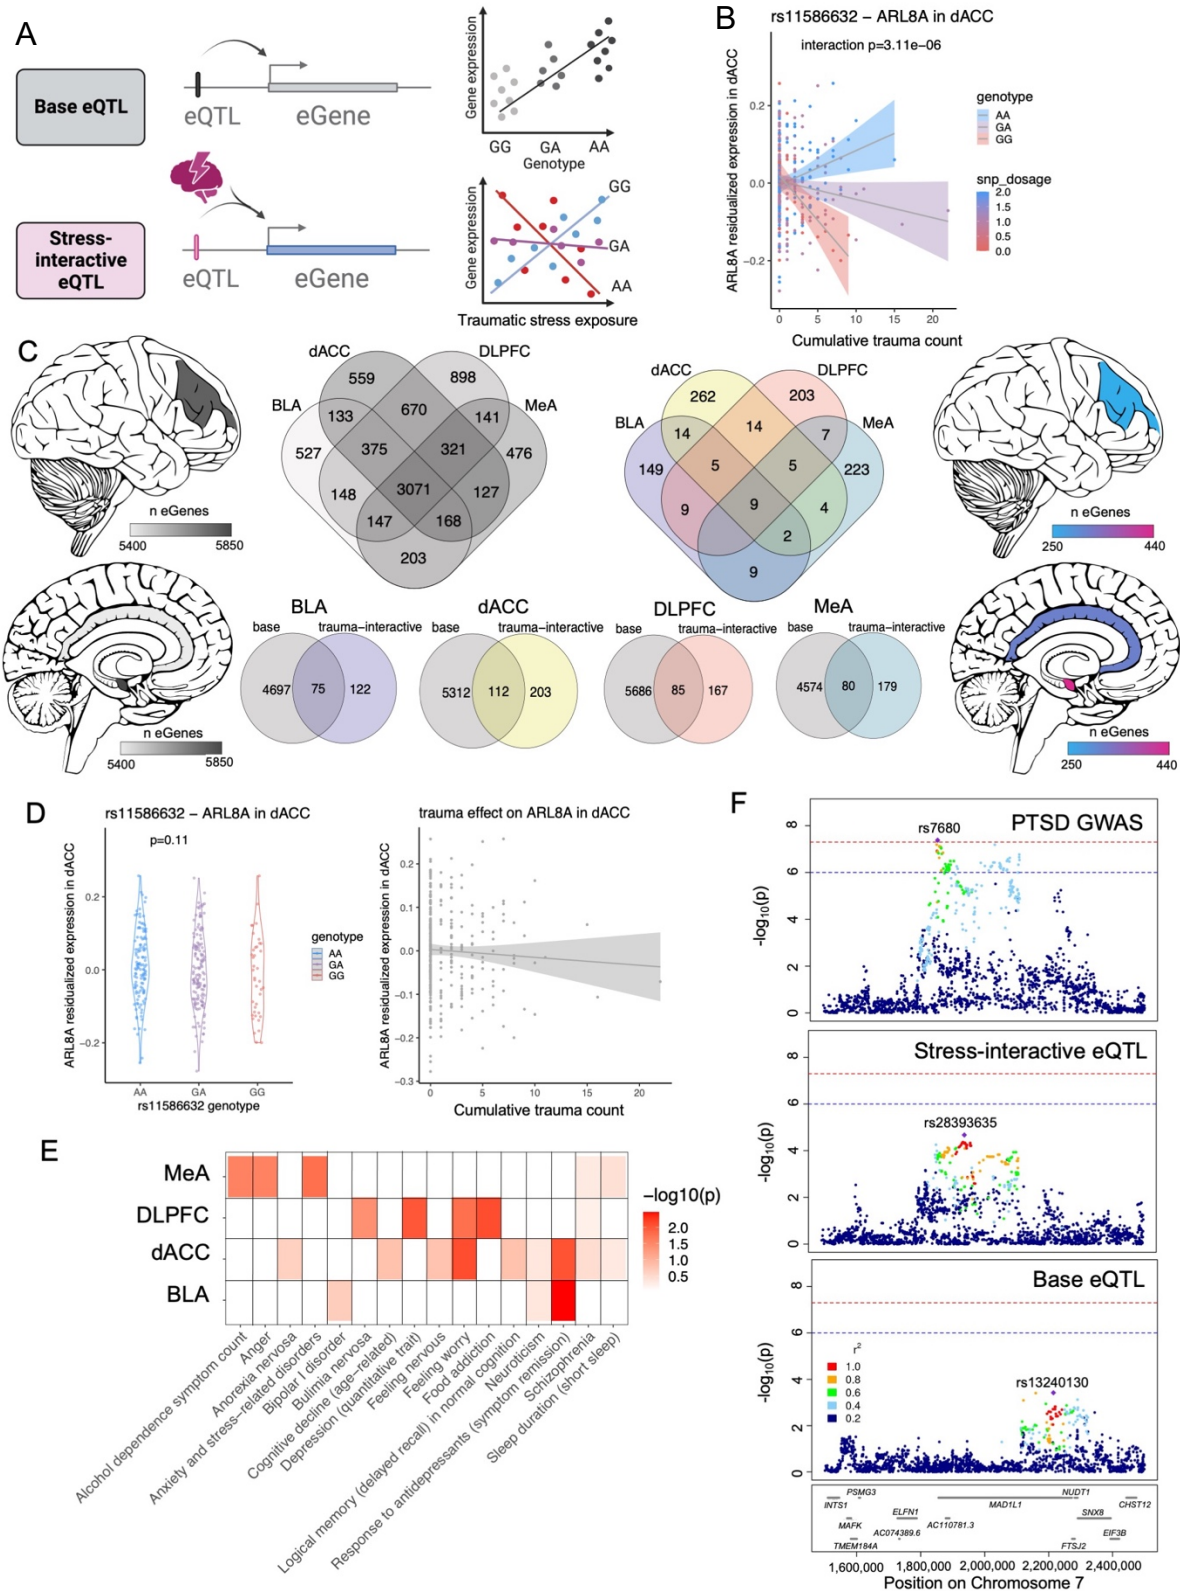

1066  
1067

**Figure 1: Genetic regulation of expression is modified by traumatic stress**

1068 A) Base eQTLs linearly associate genotype with expression of a nearby gene. Stress-interactive  
1069 eQTLs incorporate a quantitative measure of stress exposure in a linear interaction term with  
1070 genotype to measure the modification of the eQTL relationship in the context of traumatic stress.  
1071 B) rs11586632 is a stress-interactive eQTL for the ARL8A eGene in the dACC, where ARL8A  
1072 expression is differentially impacted by increasing stress burden in individuals with different  
1073 genotypes. C) Cerebroviz images representing the number of base eGenes (left) and stress-  
1074 interactive eGenes (right) detected across post-mortem brain regions. Venn diagrams show  
1075 overlap of base eGenes (left) and stress-interactive eGenes (right) across the post-mortem brain.  
1076 Venn diagrams (below) show overlap of base eGenes and stress-interactive eGenes across post-  
1077 mortem brain regions. D) (left) ARL8A expression is not significantly associated with rs11586632  
1078 genotype, demonstrating it is not a base eQTL. (right) ARL8A expression is not significantly  
1079 associated with increasing traumatic stress burden, indicating it is not a stress-induced  
1080 differentially expressed gene. E) Gene set enrichment of stress-interactive eGenes across post-  
1081 mortem brain regions in gene sets of neuropsychiatric traits from the GWAS catalog. F)  
1082 Locuszoom of the *NUDT1* locus showing SNP associations with PTSD from the PTSD GWAS  
1083 (top), stress-interactive SNP associations with *NUDT1* gene expression (middle), and base (non-  
1084 stress associated) SNP associations with *NUDT1* gene expression (bottom). Red dotted line  
1085 indicates genome-wide significance.  
1086

1087 **Figure 2**

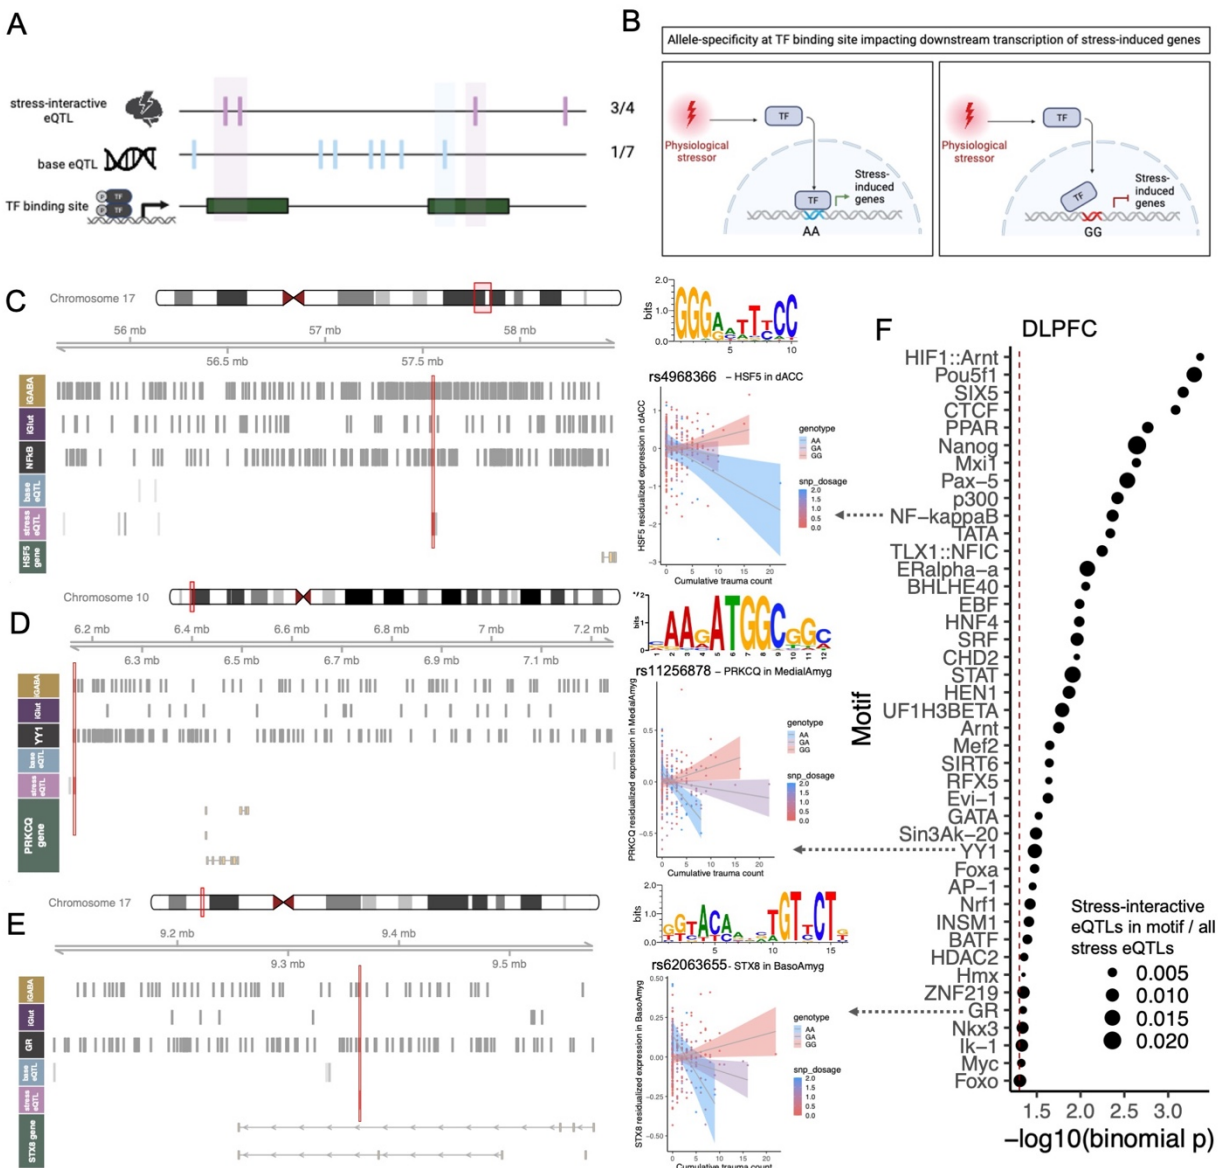

1088 **Figure 2: Unbiased discovery of novel transcription factors identifies mediators of stress**  
 1089 **response.**  
 1090

1091 A) Schematic showing enrichment of stress-interactive eQTLs in transcription factor binding sites  
 1092 was determined by frequency of stress-interactive eQTLs in that transcription factor's binding sites  
 1093 against frequency of base eQTLs in that transcription factor's binding sites. B) Proposed  
 1094 mechanism for genotype-dependent disruption of transcription factor binding sites, leading to  
 1095 differential regulation of stress-induced gene expression. C) rs4968366 is the lead stress-  
 1096 interactive eQTL for the HSF5 eGene in the dACC. rs4968366 falls in an NFkB binding motif in  
 1097 iGABA open chromatin. Base eQTLs for this eGene do not fall in NFkB binding sites. D)

1098 rs11256878 is the lead stress-interactive eQTL for the PRKCQ eGene in the MeA. rs11256878  
1099 falls in a YY1 binding motif in iGABA open chromatin. Base eQTLs for this eGene do not fall in  
1100 YY1 binding sites. E) rs62063655 is the lead stress-interactive eQTL for the STX8 eGene in the  
1101 BLA. rs62063655 falls in a GR binding motif in iGABA open chromatin. Base eQTLs for this eGene  
1102 do not fall in GR binding sites. F) Transcription factors enriched for stress-interactive eQTLs within  
1103 binding motifs compared to base eQTLs in the DLPFC. Size of point indicates the ratio of stress-  
1104 interactive eQTLs across the genome lying in the indicated motif compared to the total number of  
1105 stress-interactive eQTLs.  
1106

1107 **Figure 3**

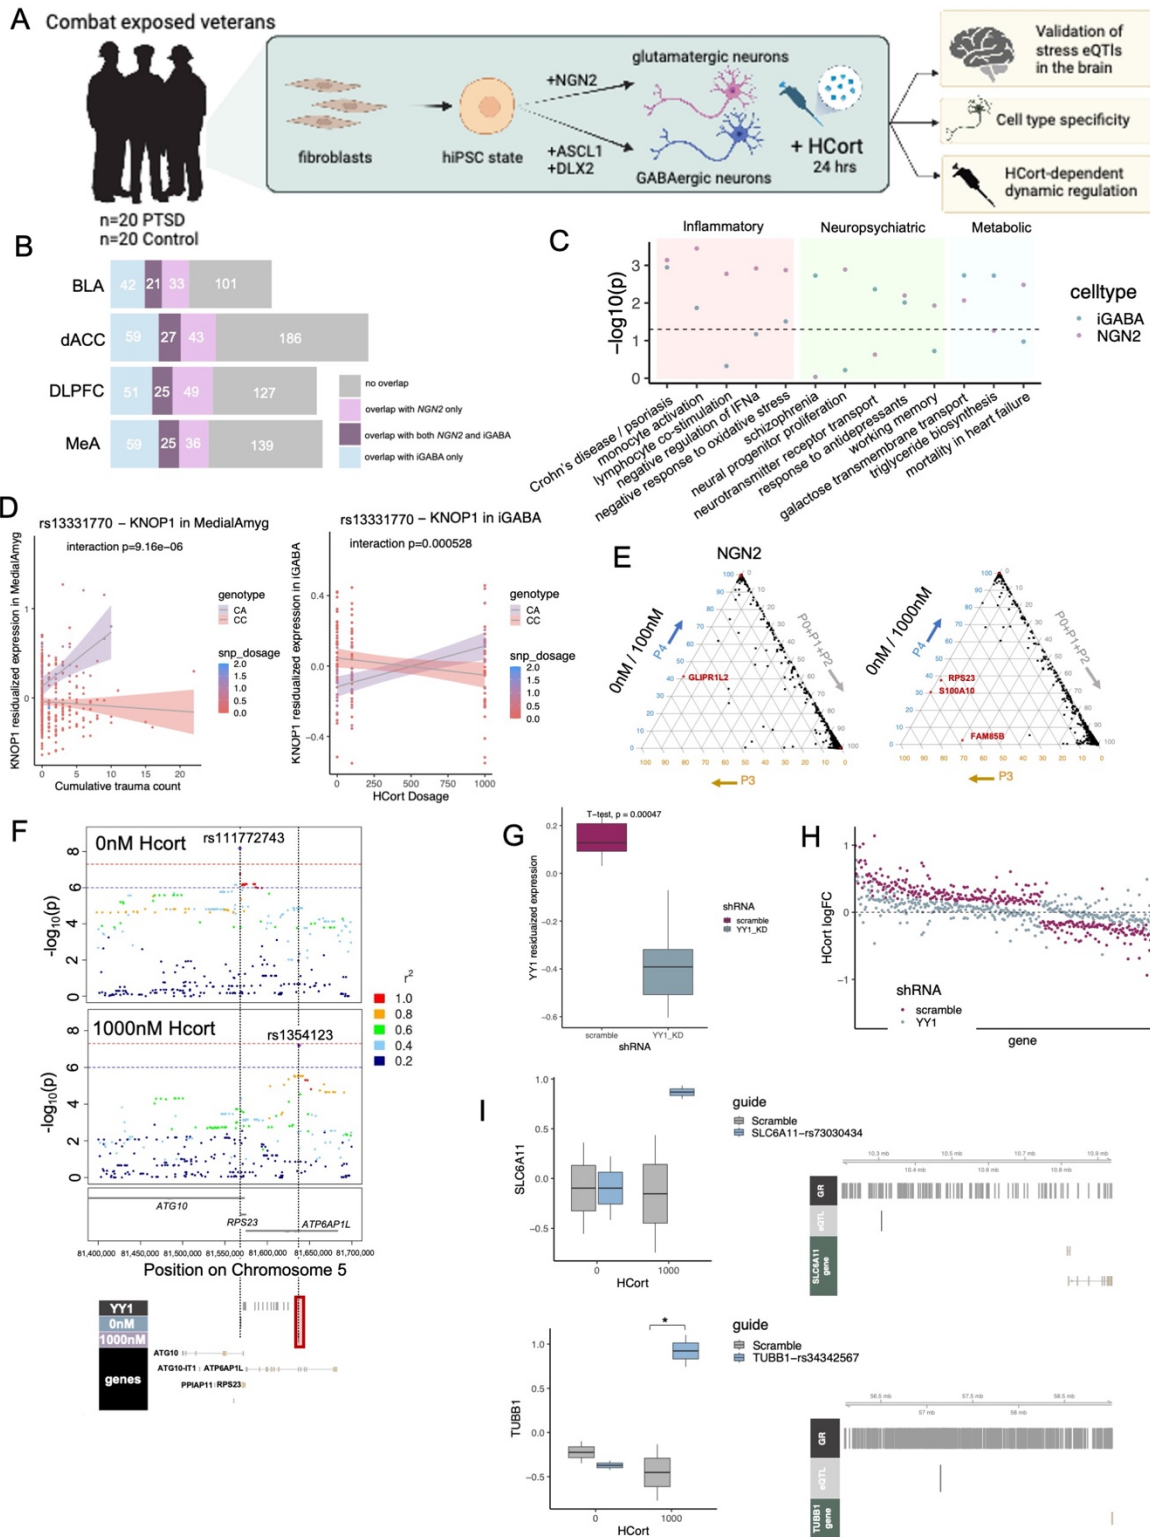



1109 **Figure 3: hiPSC-derived neurons validate genetic regulation of glucocorticoid-mediated**  
1110 **stress**

1111 A) Schematic showing collection and reprogramming of PTSD case and control donor fibroblasts  
1112 through the hiPSC state and differentiation into glutamatergic and GABAergic neurons, treated  
1113 with HCort for 24 hours. B) Overlap of glucocorticoid dosage-interactive eGenes in hiPSC (blue:  
1114 overlap with iGABA, pink: overlap with iGLUT, purple: overlap with both) with stress-interactive  
1115 eGenes across the four post-mortem brain tissues. C) Enrichment of unique iGABA (blue) and  
1116 iGLUT (pink) stress-interactive eGenes in inflammatory, neuropsychiatric, and metabolic  
1117 pathways. Black dotted line indicates significant enrichment. D) rs13331770 is a stress-interactive  
1118 eQTL regulating the *KNOP1* gene in the MeA with traumatic stress (left), and in GABAergic  
1119 neurons with glucocorticoid-induced stress (right). E) Ternary plots showing pair-wise  
1120 colocalization of glutamatergic neurons treated with 100 nM HCort (left) and 1000 nM HCort (right)  
1121 compared to baseline. P0/P1/P2 indicates no eQTL association at either dose or association only  
1122 at a single dose. P3 indicates eQTL associations at both doses but at separate causal variants.  
1123 P4 indicates eQTL associations at both doses with a shared causal variant. Genes with  $P3 > 0.5$   
1124 are highlighted in red. F) Locuszoom of the *RPS23* locus showing SNP associations with *RPS23*  
1125 gene expression at baseline (top), and with exposure to 1000 nM HCort (bottom). Red dotted line  
1126 indicates genome-wide significance. The lead SNP at the *RPS23* locus at baseline (rs111772743,  
1127 blue track) and with 1000 nM HCort (rs1354123, purple track) indicating that only the lead SNP  
1128 with HCort exposure (rs1354123) lies in a YY1 binding motif. G) YY1 expression is reduced with  
1129 shRNA-mediated knockdown compared to scramble. H) The log<sub>2</sub>FC of HCort-stimulation in  
1130 HCort-responsive genes in the scramble condition (purple) and with YY1 shRNA-mediated  
1131 knockdown (blue). I) (left) Expression of eGenes treated with scramble (gray) or CRISPRi  
1132 perturbation (blue) of putative stress-interactive regulatory regions at baseline or with HCort  
1133 exposure. Targeted regions are located in GR binding sites (right).

1134

1135 **Figure 4**

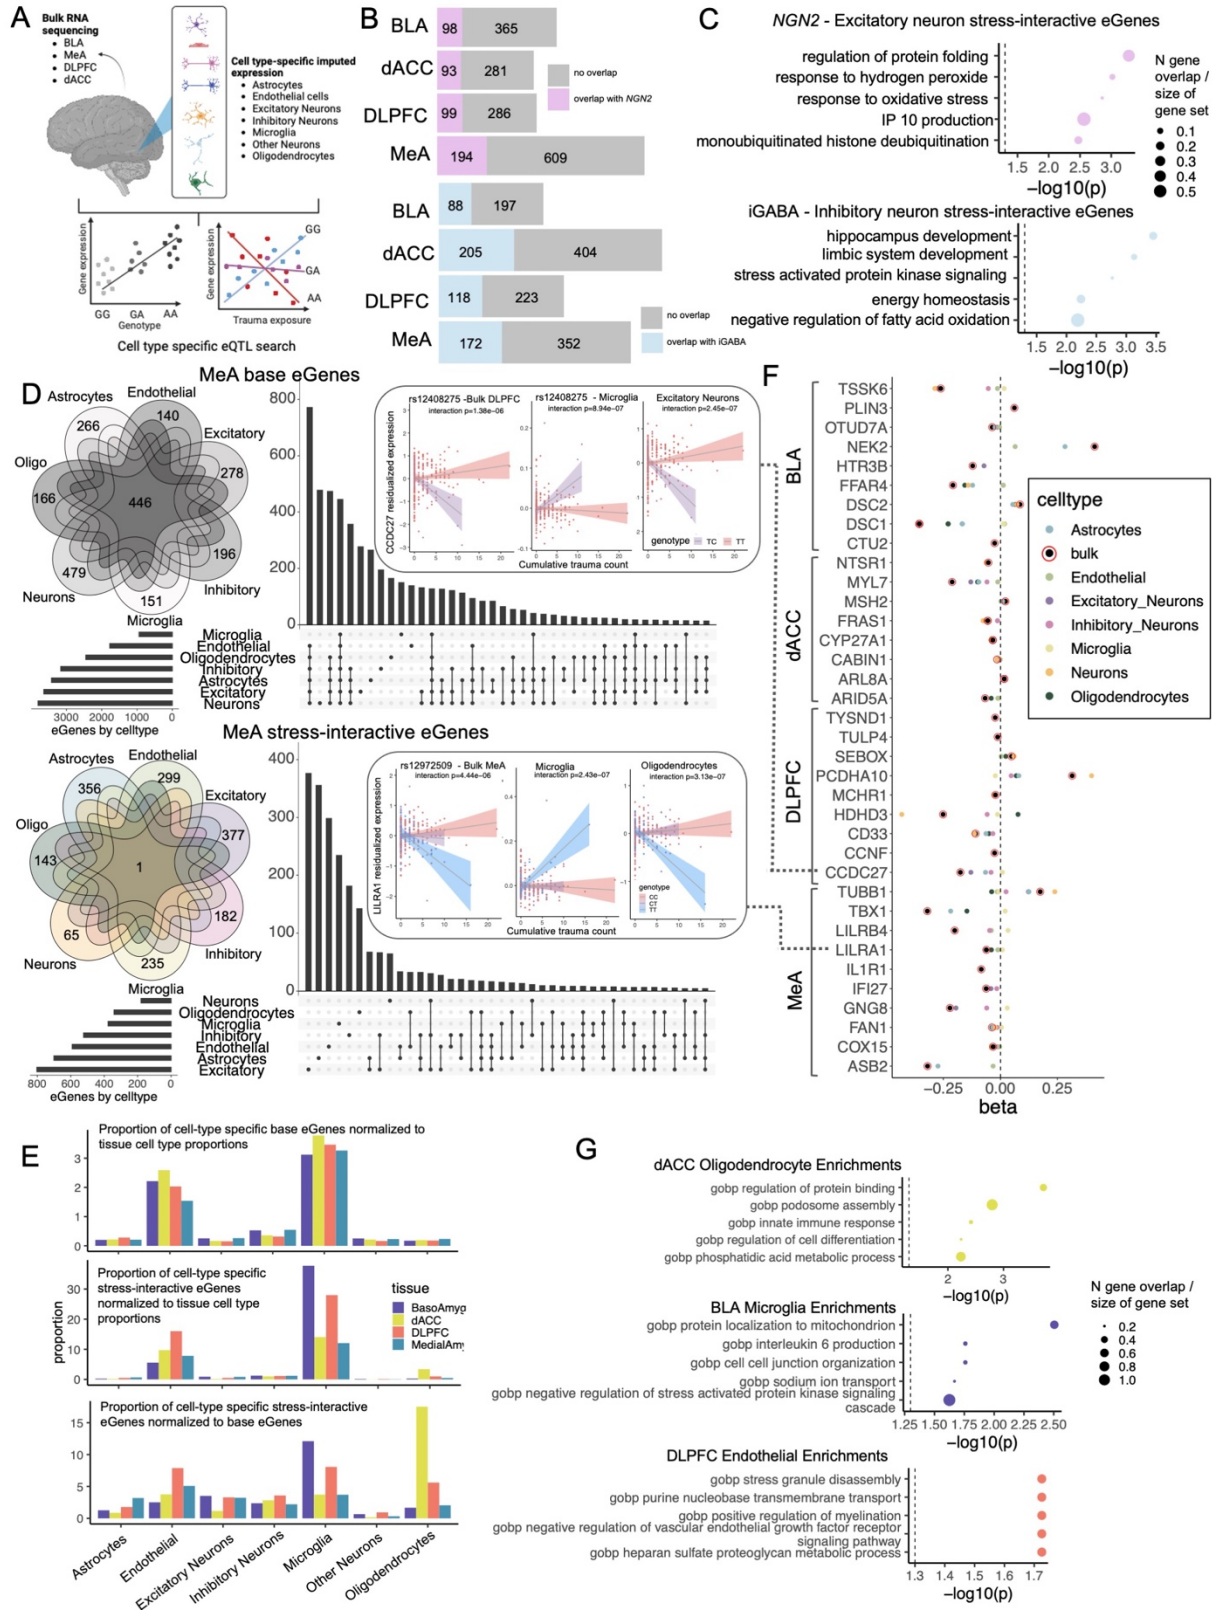



1138 **Figure 4: Novel cell types mediate region-specificity in genotype-dependent stress**  
1139 **response**

1140 A) Schematic showing bulk sequencing data was deconvoluted into 7 cell type-specific expression  
1141 matrices, and base- and stress-interactive eQTLs were determined for each cell type in each brain  
1142 region. B) Overlap of imputed excitatory neuron stress-interactive eGenes in the post-mortem  
1143 brain with hiPSC-derived iGLUT stress-interactive eGenes (top) and imputed inhibitory neuron  
1144 stress-interactive eGenes with iGABA neuron stress-interactive eGenes (bottom). C) Gene  
1145 ontology enrichments of overlapping stress-interactive eGenes between post-mortem brain  
1146 imputed cell types and hiPSC-derived neurons for iGLUT neurons and brain excitatory neurons  
1147 (top) and iGABA neurons and brain inhibitory neurons (bottom). D) Base (top) and stress-  
1148 interactive (bottom) eGene overlap across imputed cell types from the MeA. E) Effect sizes for  
1149 eQTLs in bulk tissue and in any cell types for which the eQTL is significant in a subset of genes  
1150 across the four post-mortem brain regions, with inserts for rs12408275, a stress-interactive eQTL  
1151 which has opposite effect sizes on the CCDC27 eGene in microglia compared to excitatory  
1152 neurons, and rs12972509, a stress-interactive eQTL which has opposite effect sizes on the  
1153 LILRA1 eGene in microglia compared to oligodendrocytes. F) Proportions of cell type-specific  
1154 eGenes compared to all cell type eGenes normalized to their respective cell type proportions in  
1155 the four post-mortem brain tissues for base eGenes (top), stress-interactive eGenes (middle), and  
1156 in stress-interactive eGenes compared to base eGenes (bottom). G) Gene ontology enrichments  
1157 of stress-interactive eGenes in oligodendrocyte in the dACC (top), microglia in the BLA (middle),  
1158 and endothelial cells in the DLPCF (bottom). Dotted line indicates significance.

1159

1160 **Figure 5**

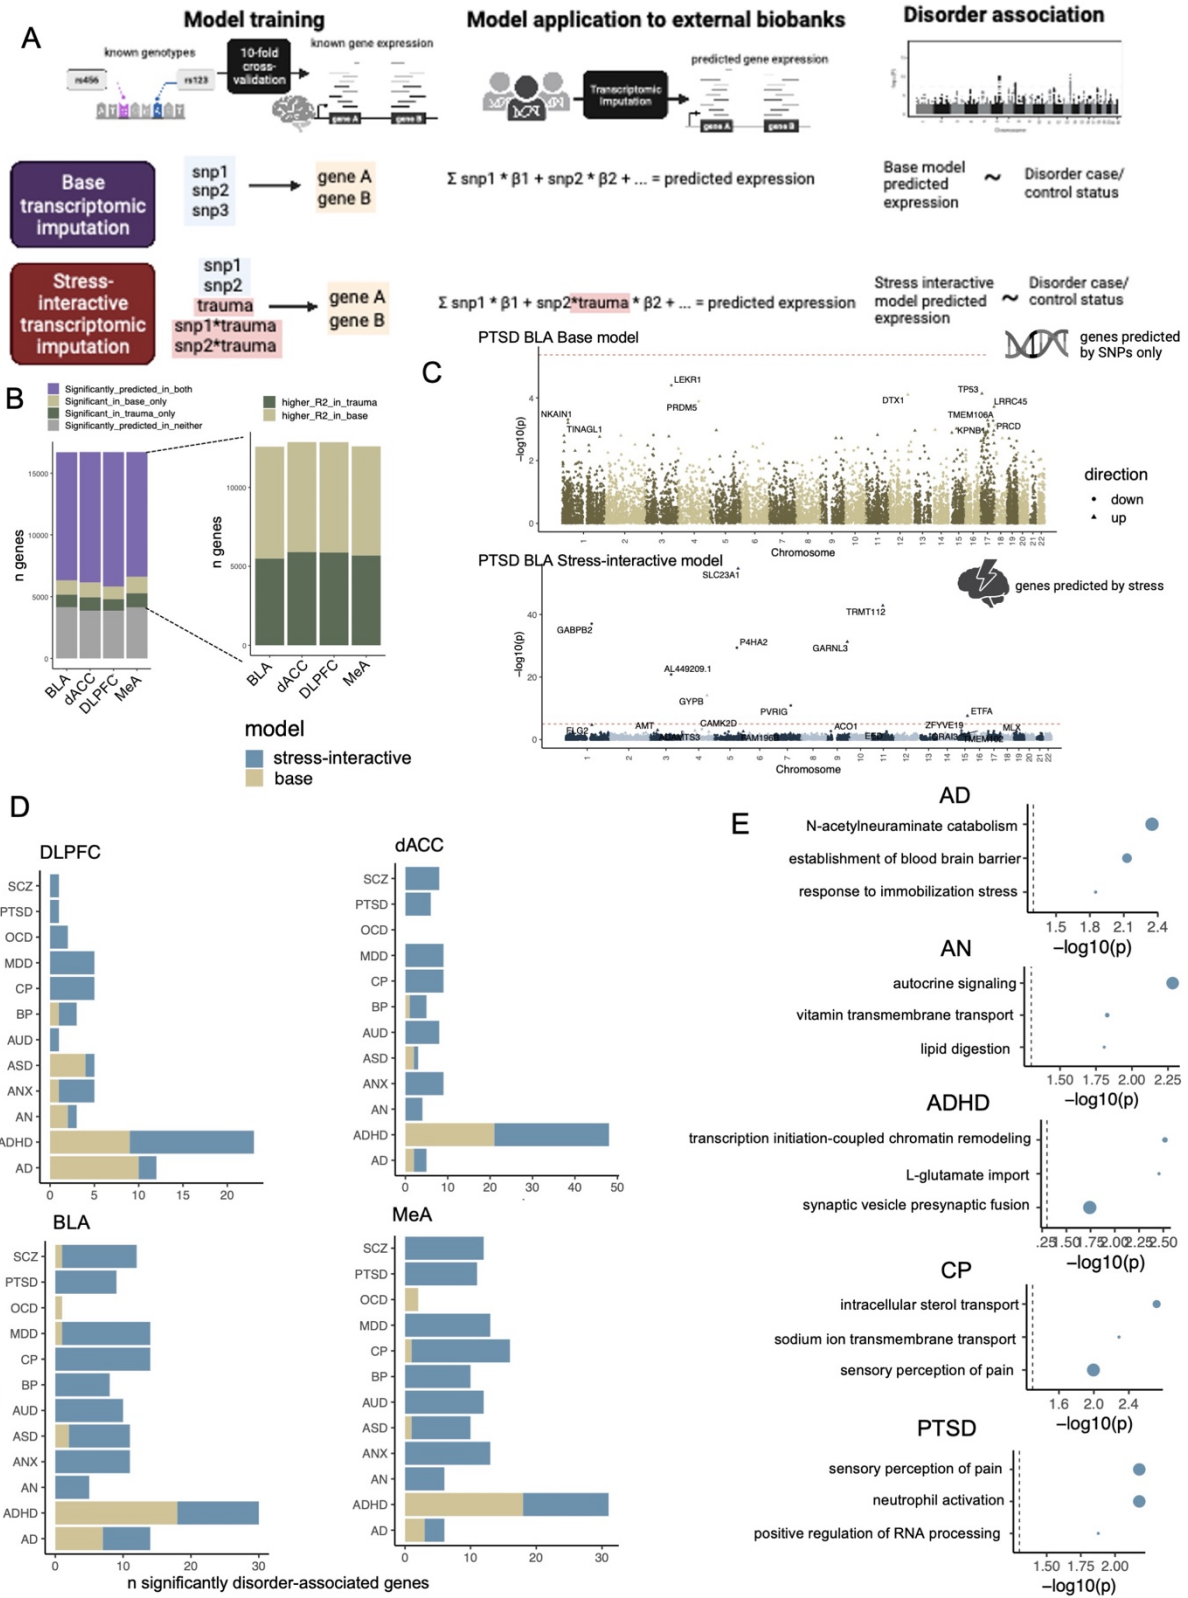

1162 **Figure 5: Stress-interactive genetic regulation of expression underlies risk across**  
1163 **neuropsychiatric disorders**

1164 A) Schematic showing training and validation of base- and stress-interactive transcriptomic  
1165 imputation models and application to external biobanks to identify genotype-predicted and  
1166 genotype-and-stress predicted genes associated with neuropsychiatric disorders. B) Bar plot  
1167 indicating cross-validation predictive accuracy of base and stress-interactive transcriptomic  
1168 imputation models (left). Of significantly predicted genes in either model, proportion of genes more  
1169 accurately predicted by base and stress-interactive models (right). C) Manhattan plot showing  
1170 transcriptome-wide association results of imputed differential expression by the base (top) and  
1171 stress-interactive (bottom) model as applied to PTSD. Red dotted line indicates genome-wide  
1172 significance. D) Number of significantly disorder-associated genes identified by transcriptome-  
1173 wide association studies for 12 neuropsychiatric traits by base (gold) and stress-interactive (blue)  
1174 models in each post-mortem brain region. Inserts show proportion of genes identified by stress-  
1175 interactive models with an underlying most significant eQTL in a particular cell type. E) Gene  
1176 ontology enrichments of stress-interactive model-predicted disorder-associated genes for  
1177 AD=Alzheimer's disease, AN=anorexia nervosa, ADHD=attention-deficit hyperactivity disorder,  
1178 CP=chronic pain, PTSD=post-traumatic stress disorder. Dotted black line indicates significance.  
1179

## Supplementary Figures

bioRxiv preprint doi: <https://doi.org/10.1101/2023.12.27.573459>; this version posted December 28, 2023. The copyright holder for this preprint (which was not certified by peer review) is the author/funder. All rights reserved. No reuse allowed without permission.

**Figure S1**

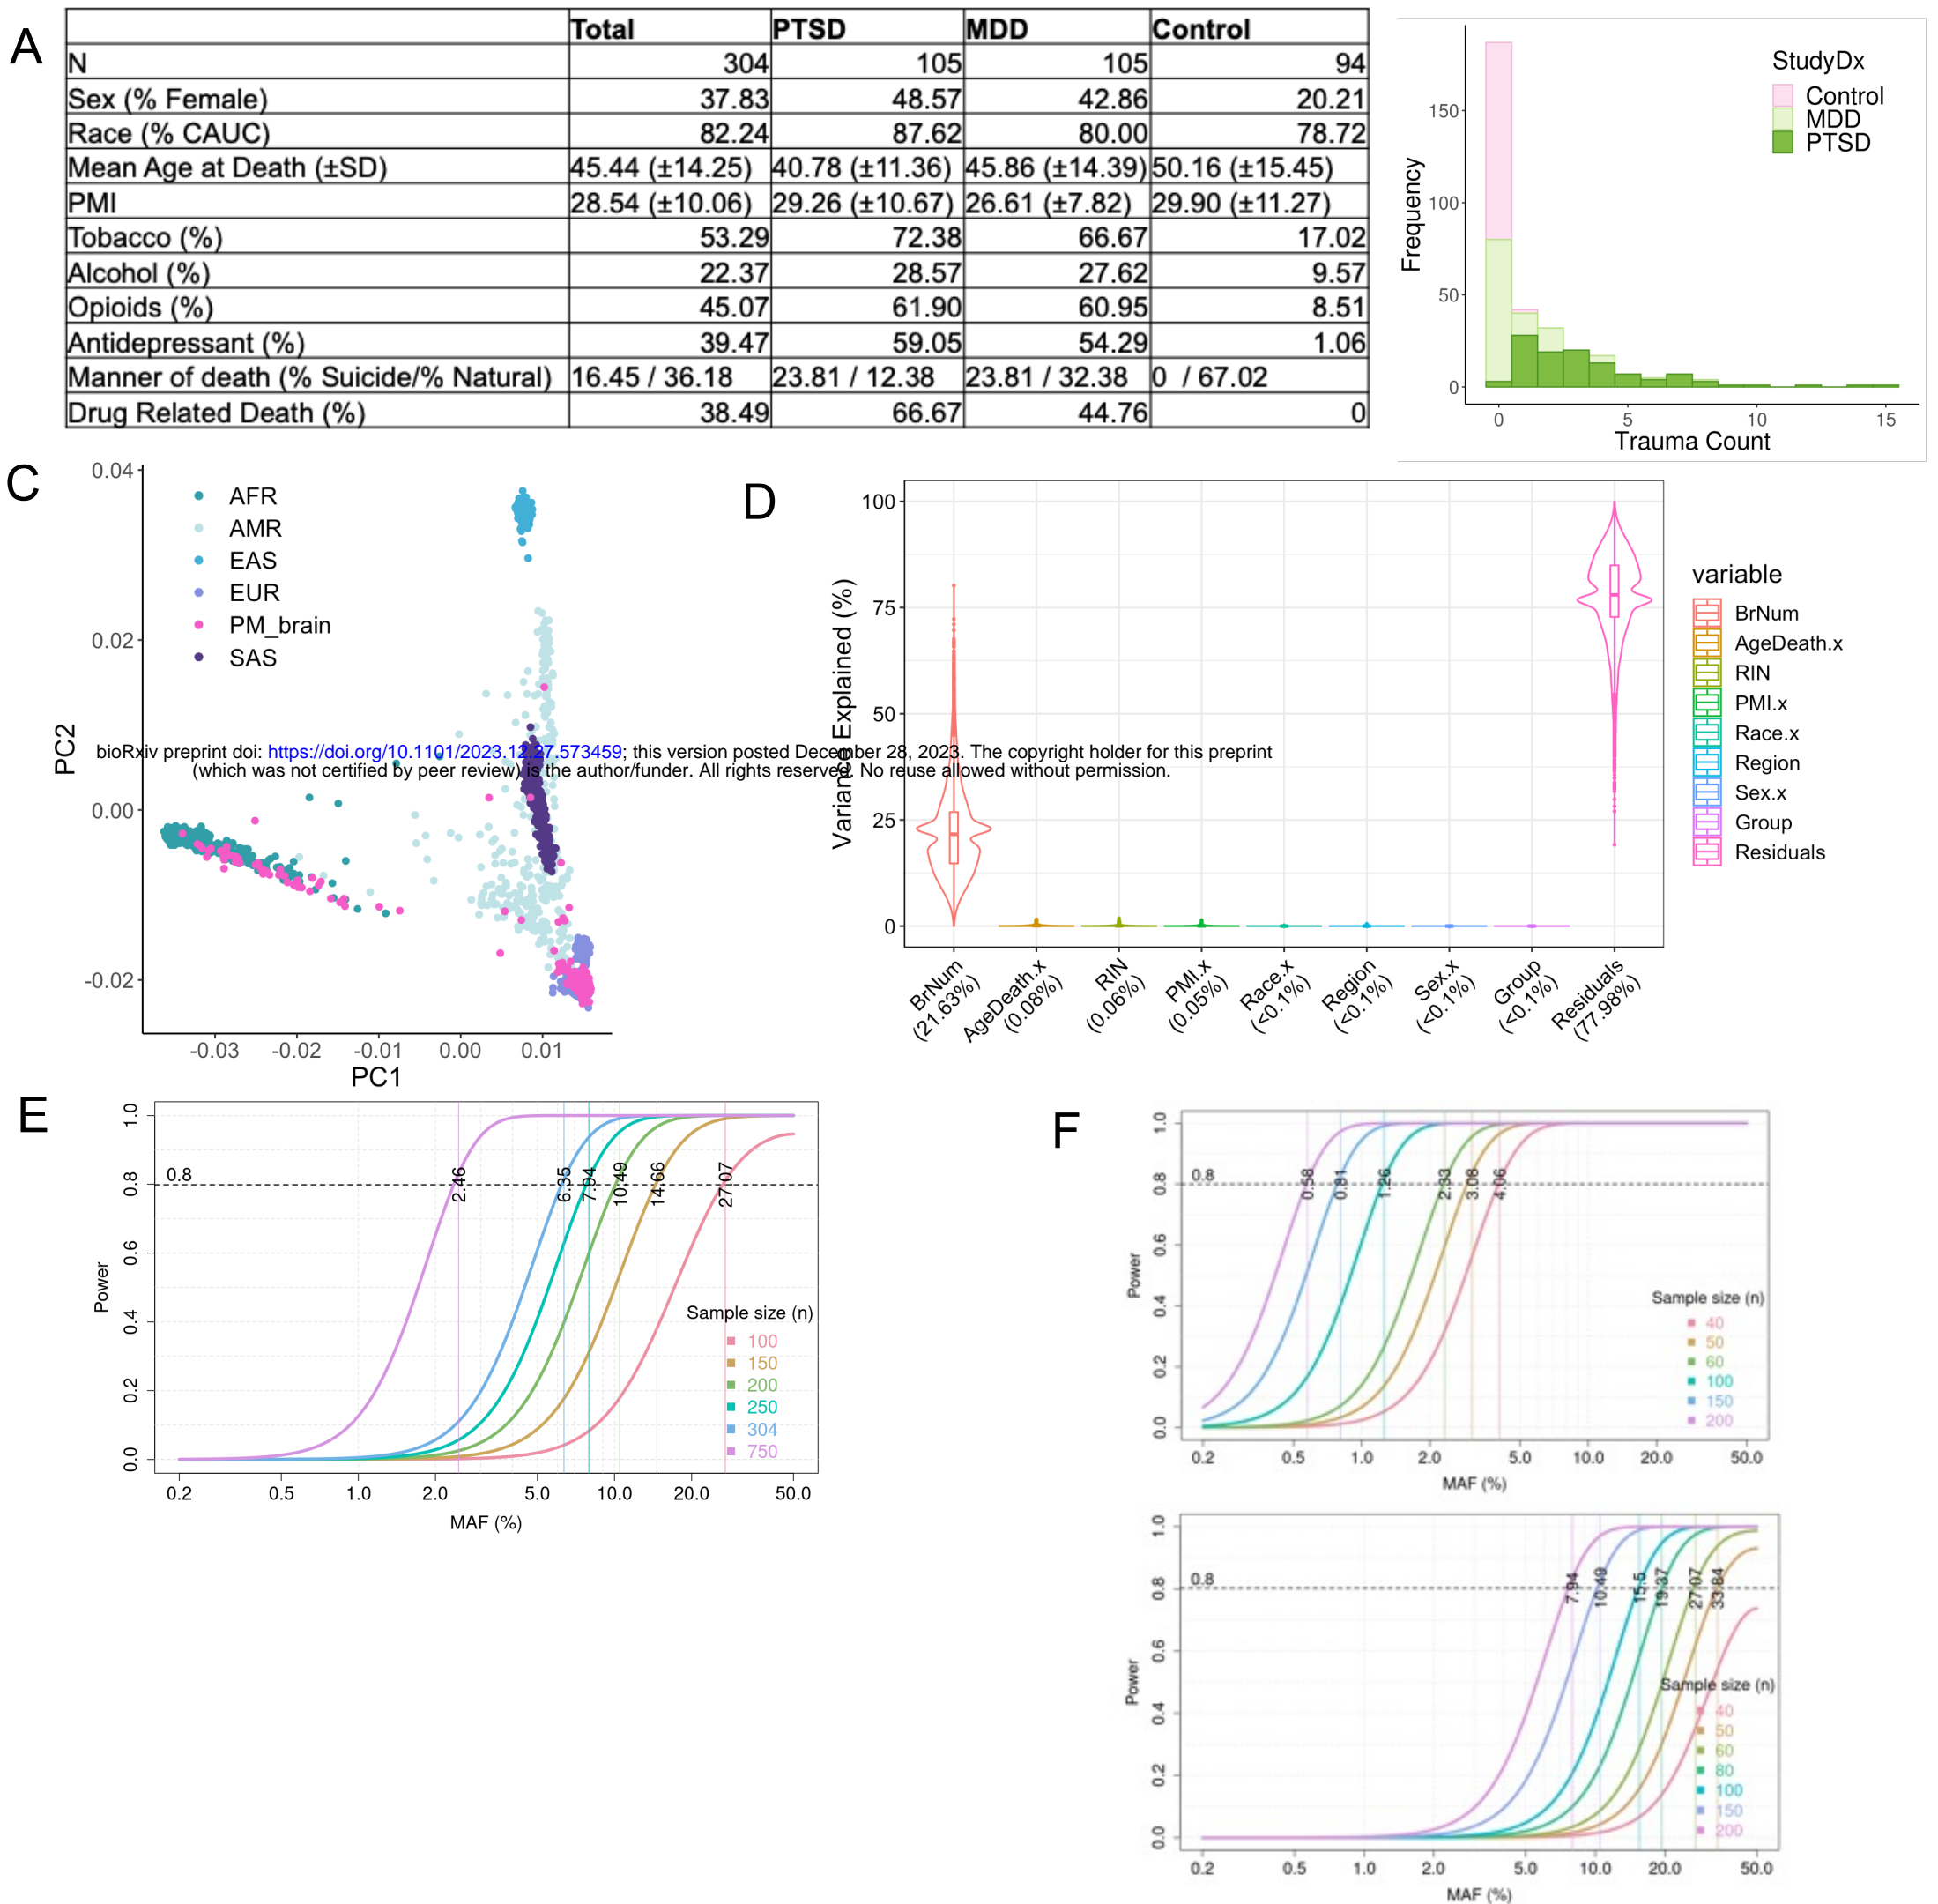

**Cohort and power descriptions**

A) Post-mortem brain cohort demographics split by diagnosis. B) Frequency of cumulative traumatic exposures in post-mortem brain diagnosis, colored by diagnosis. C) Genotype-derived principal components projected onto the 1000 genomes cohort indicative of ancestry mapping. D) VariancePartition plots indicating percent of variance explained of various covariates in the post-mortem brain cohort. E) Power to detect eQTL effects in the post-mortem brain cohort based on GTEx post-mortem eQTLs. F) Power to detect eQTL effects in the hiPSC-derived neuronal cohort based on assumptions for post-mortem analysis (above) and hiPSC-corrected SD assumption (below)



# Figure S2

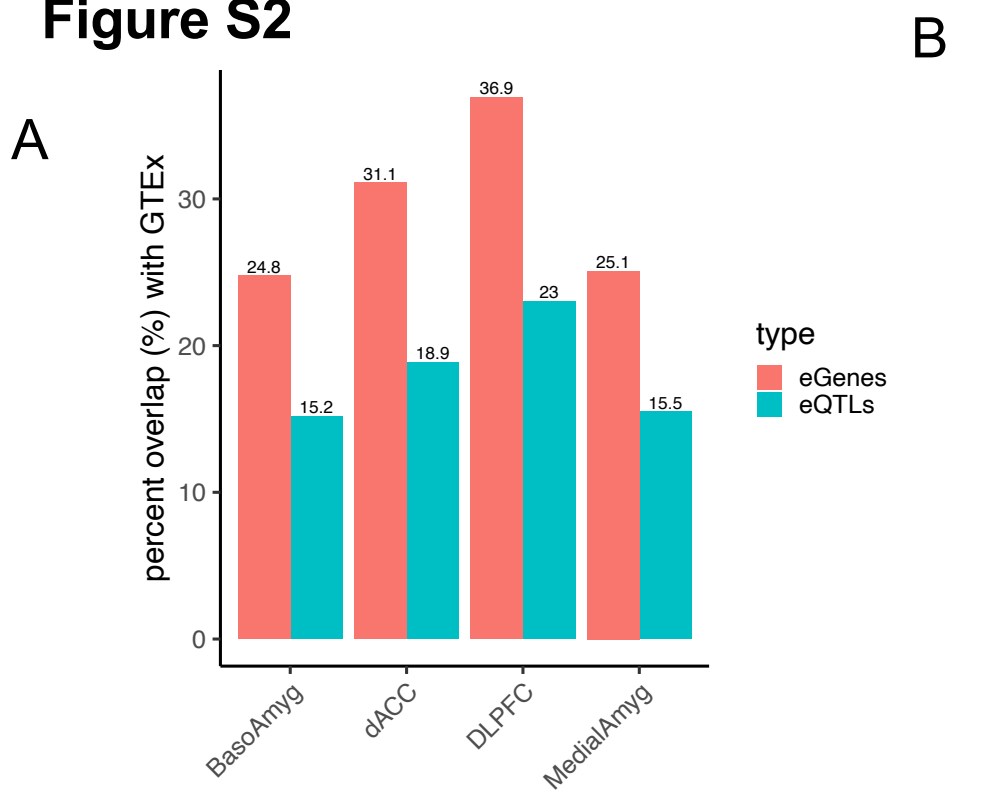

**B**

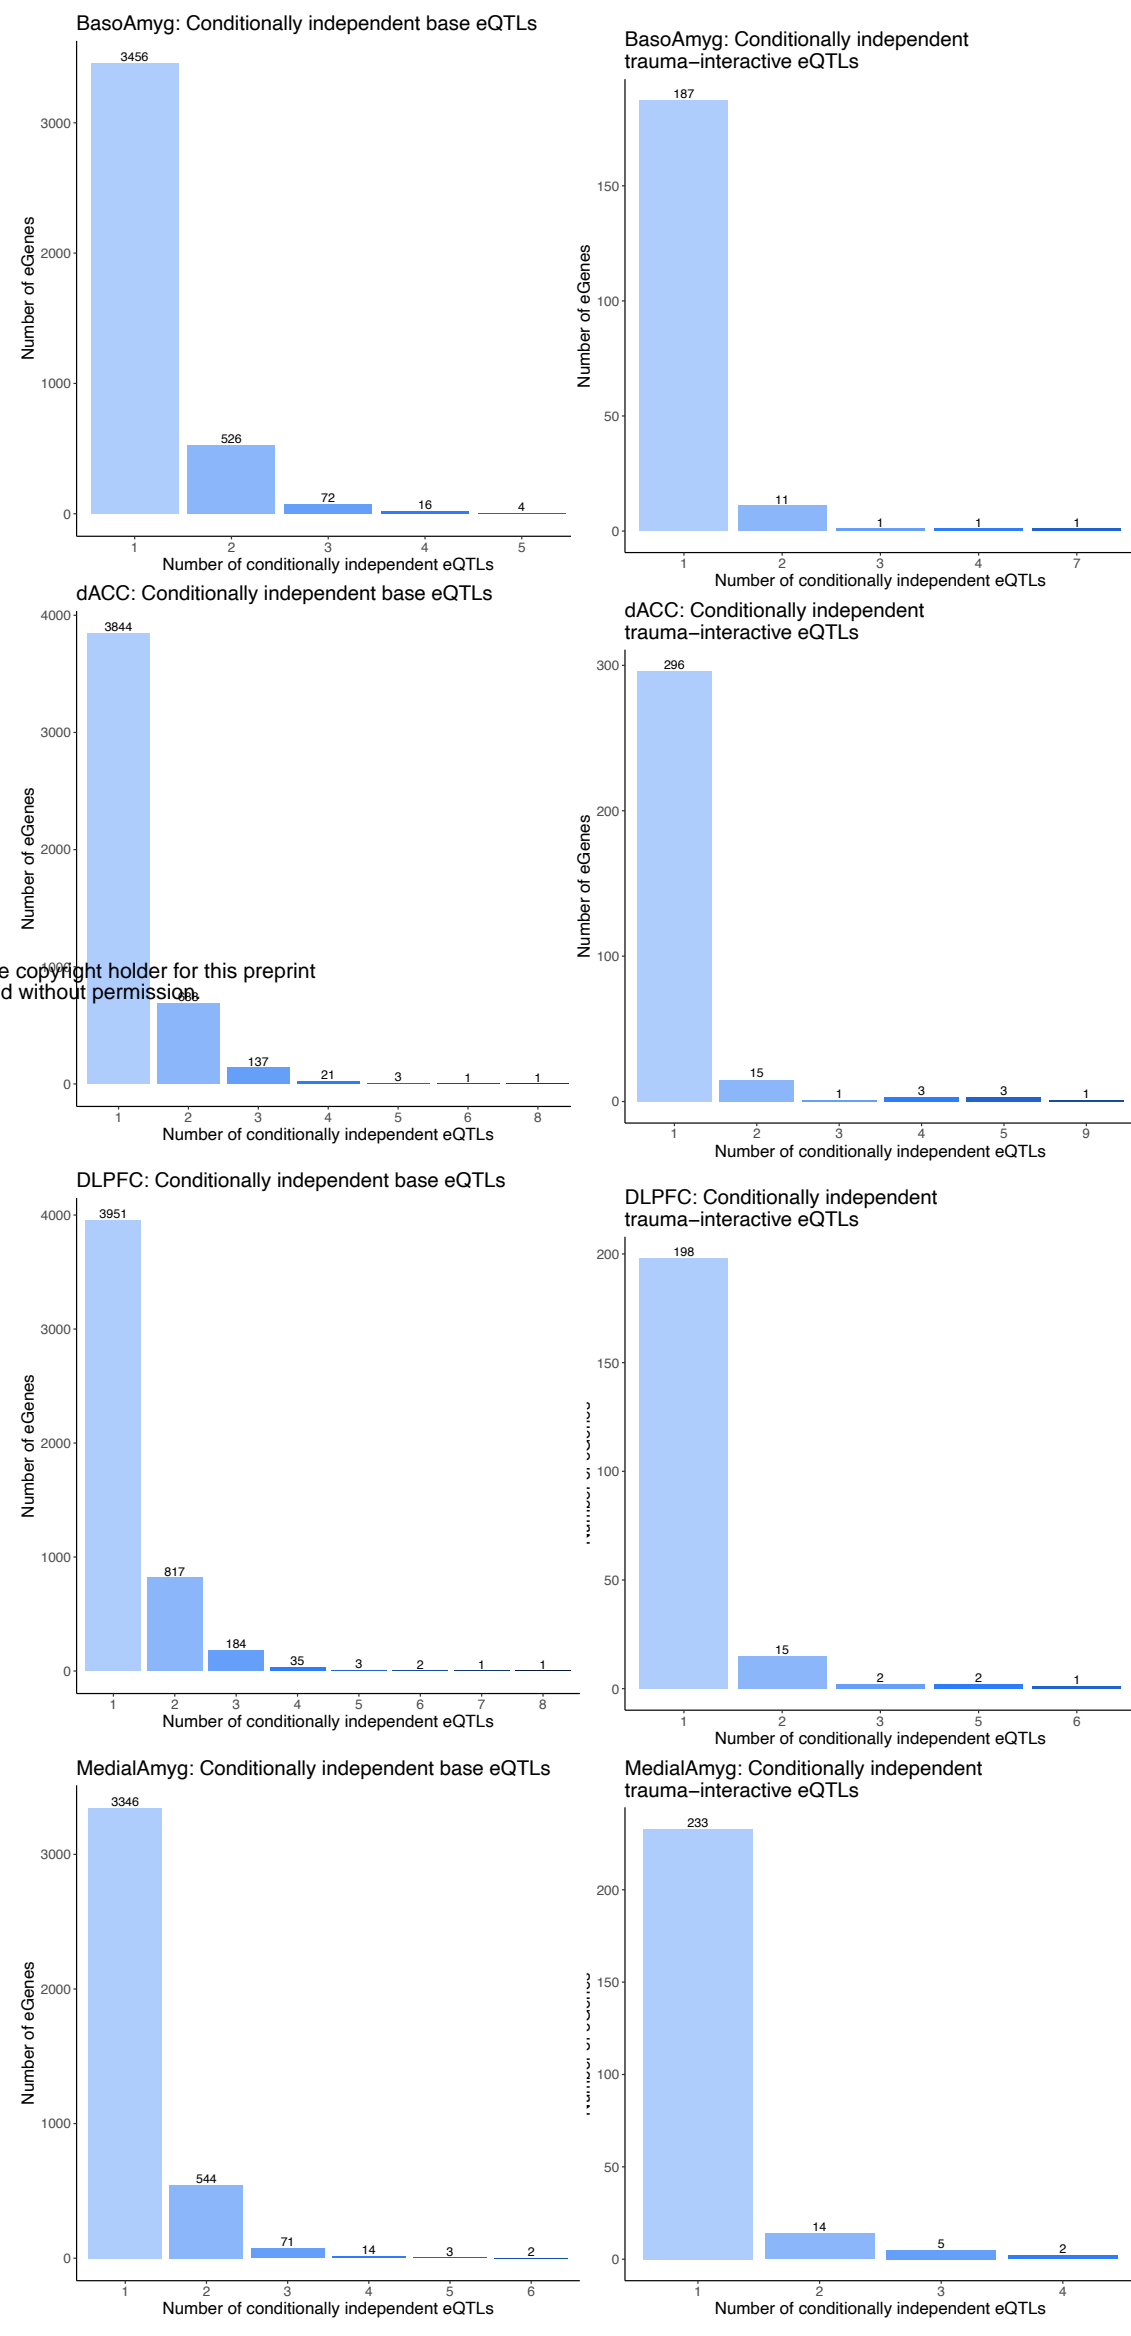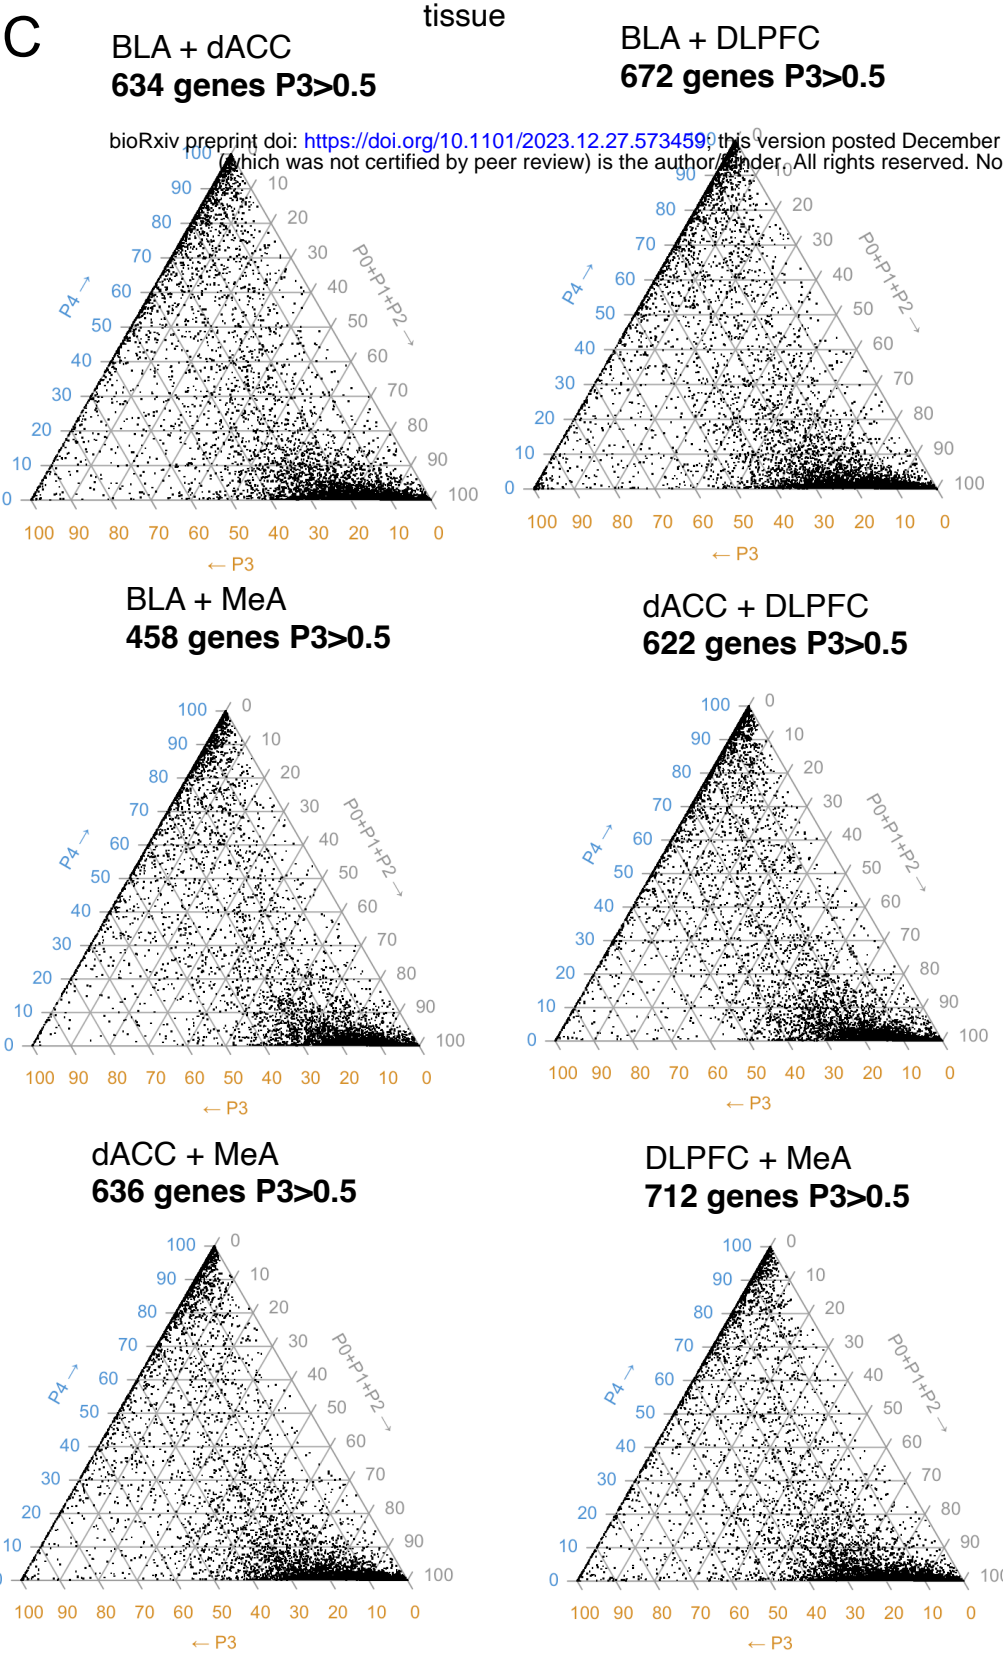

**D**

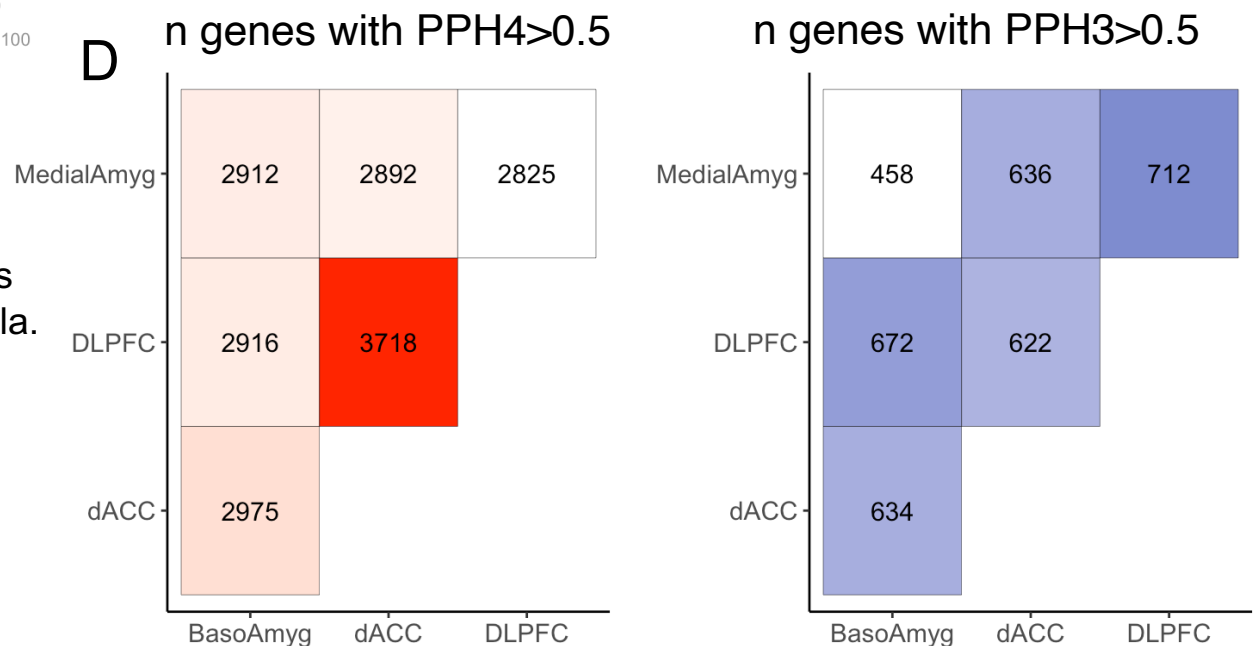

**Post mortem brain eQTL replication and region comparison**

A) Percent overlap of eQTLs (blue) and eGenes (red) in this study with GTEx eQTLs in the dACC, DLPFC, and amygdala.

B) Number of conditionally independent eQTL signals for each base (left) or stress-interactive (right) eGene in each brain region.

C) Pair-wise colocalization between brain regions indicating shared eGenes with independent underlying regulation.

D) Heatmap showing number of eGenes with colocalized (left) and independent regulation (right) across brain regions.

**Figure S3**

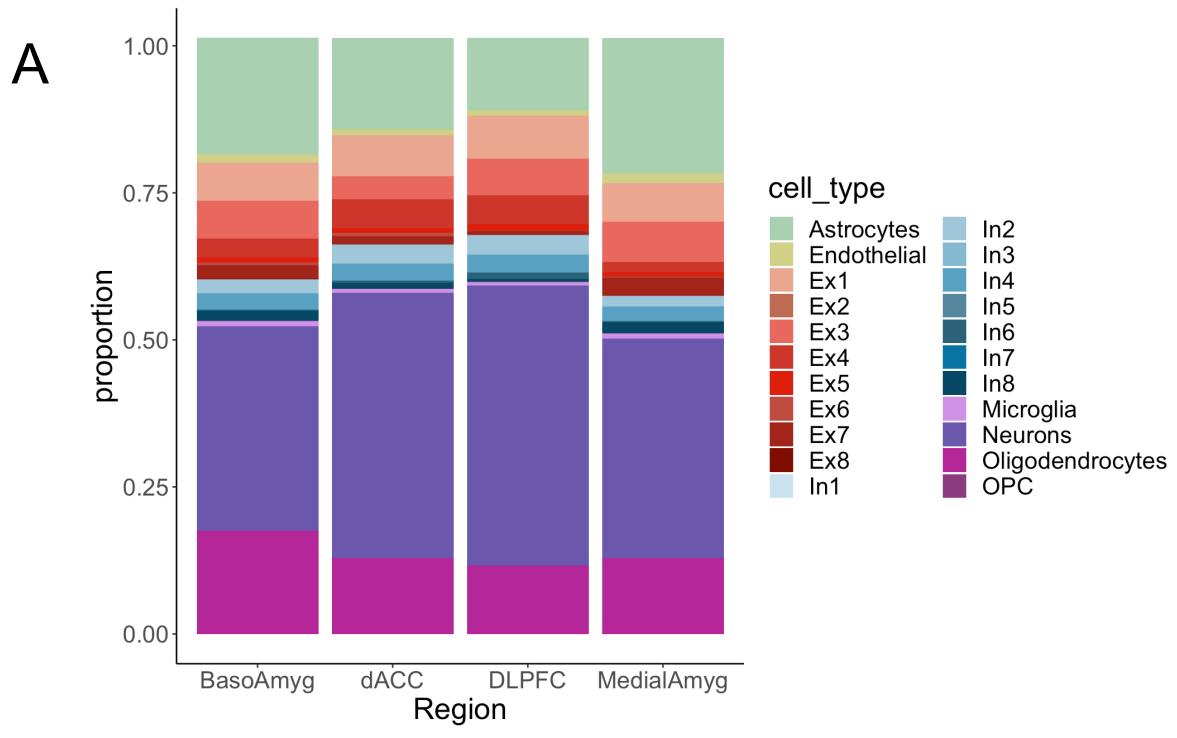

**Cell type composition of bulk brain regions**  
 A) Imputed cell type proportions of post-mortem brain regions using psychENCODE cell type reference panels. B) Venn diagram of number of significant eGenes before and after covarying for cell type proportion. C) PCA plots of imputed cell type-specific expression for each brain region. D) Replication of imputed cell type specific eQTLs with previously published single cell eQTLs (Bryois et al)

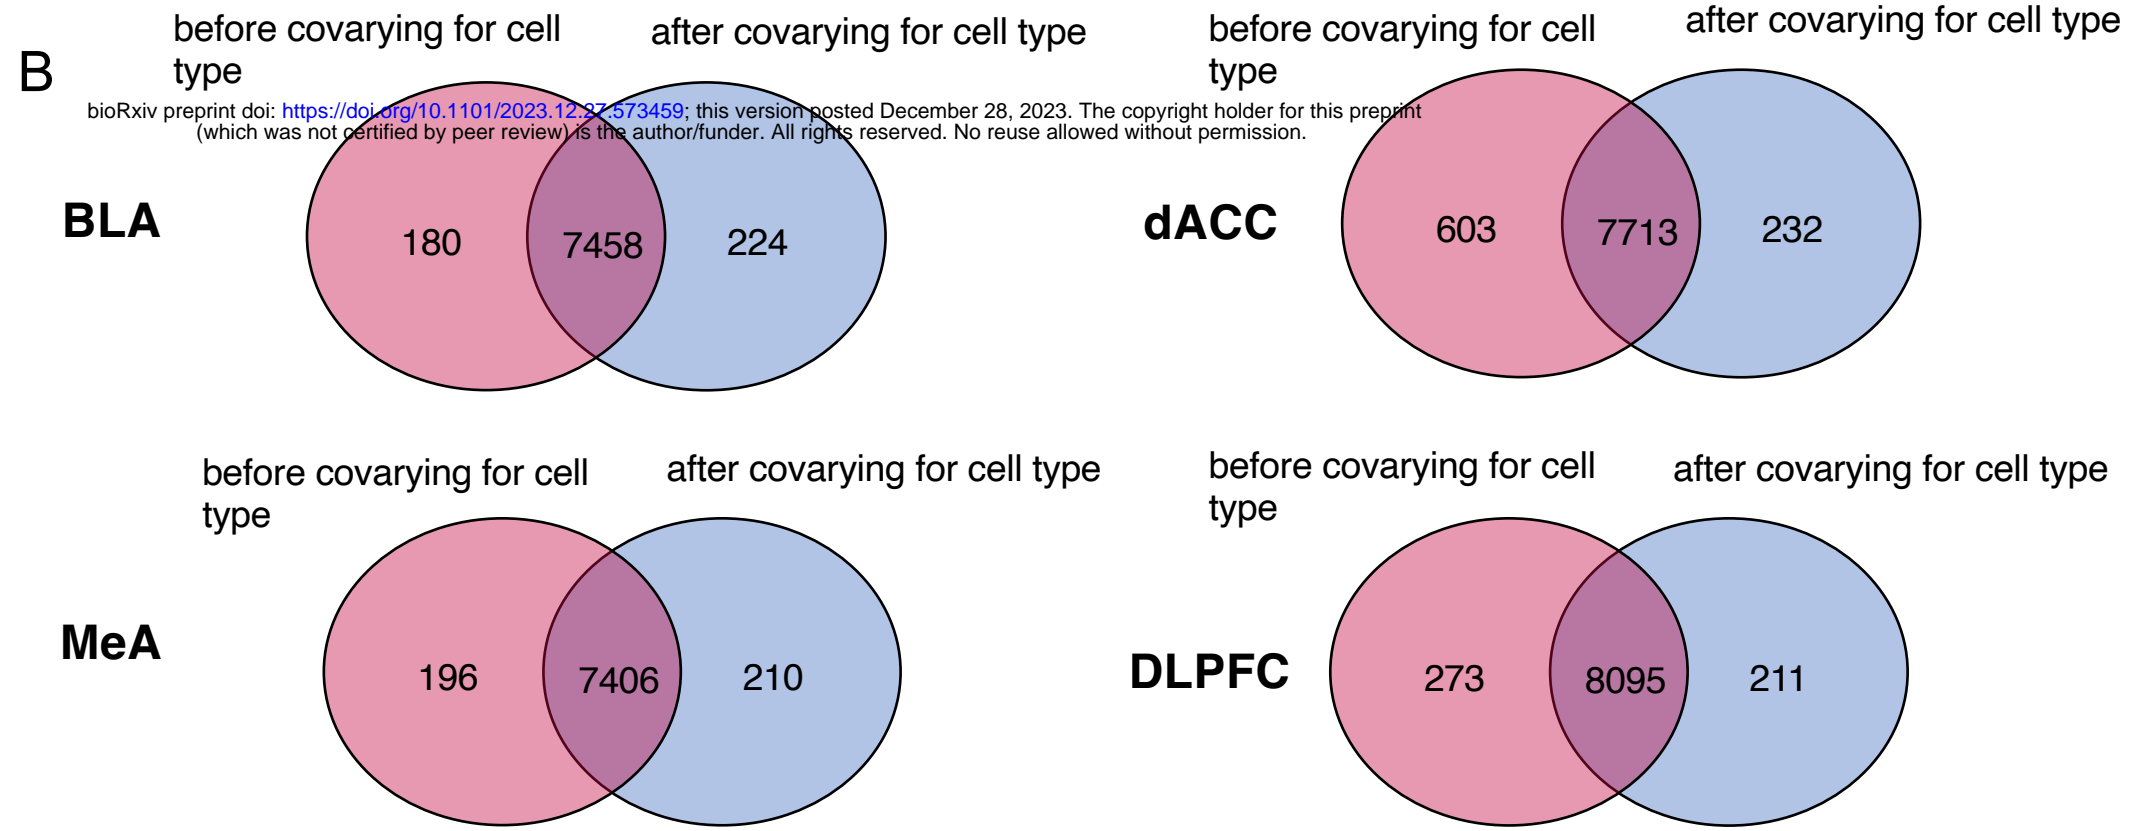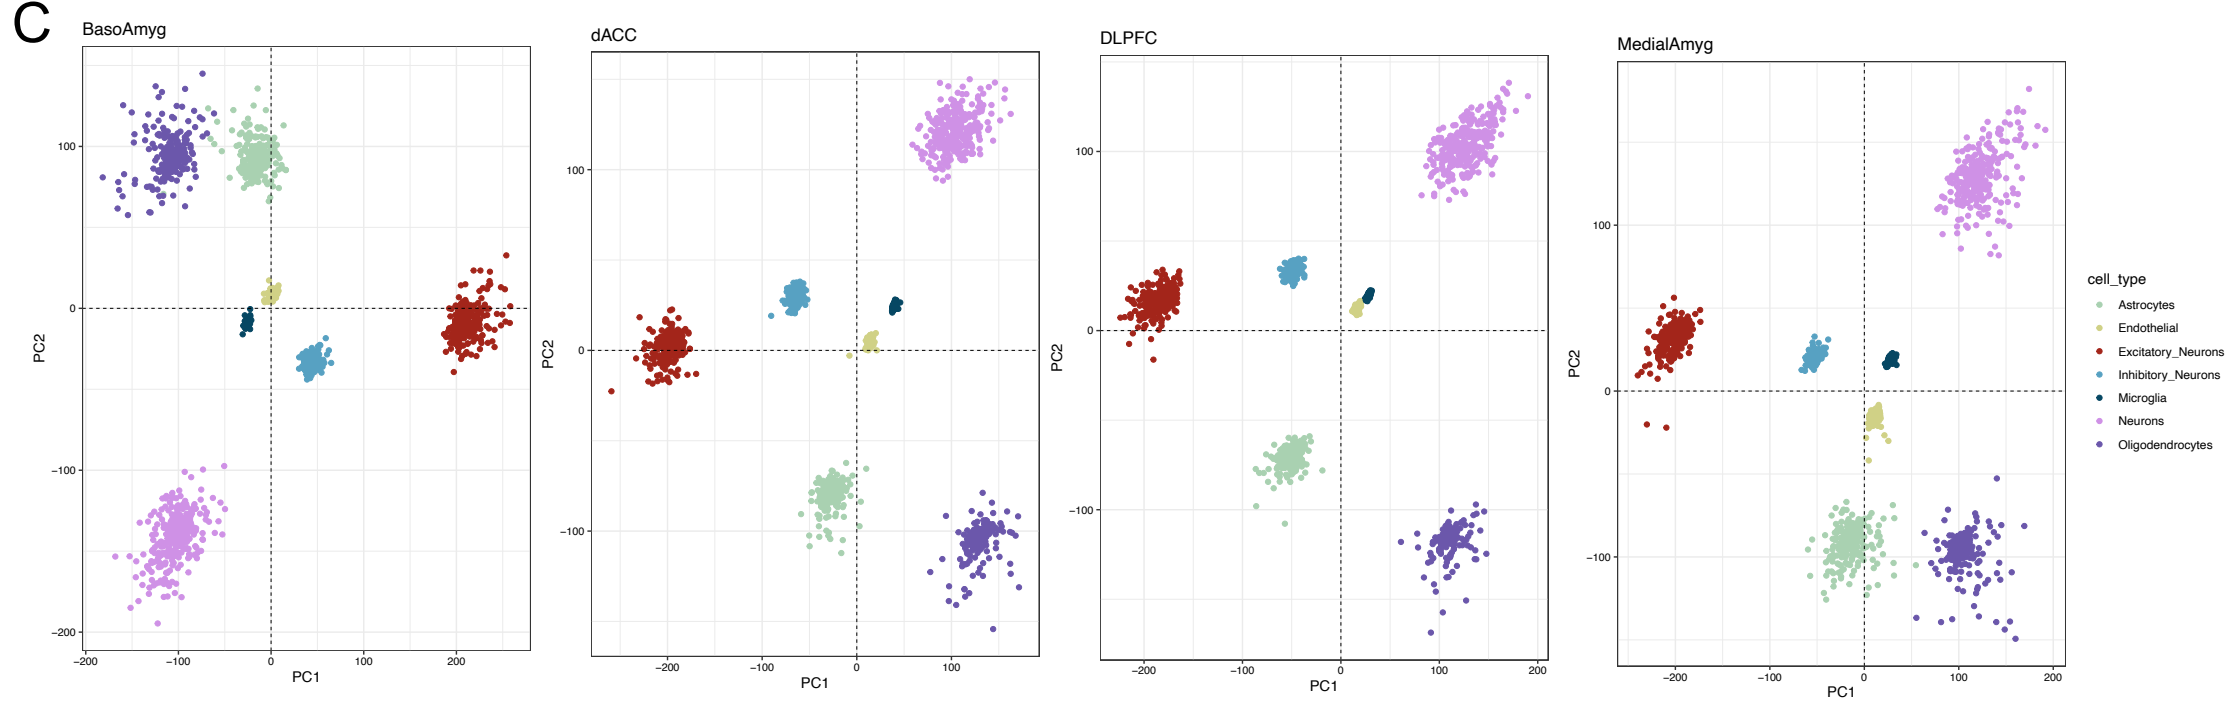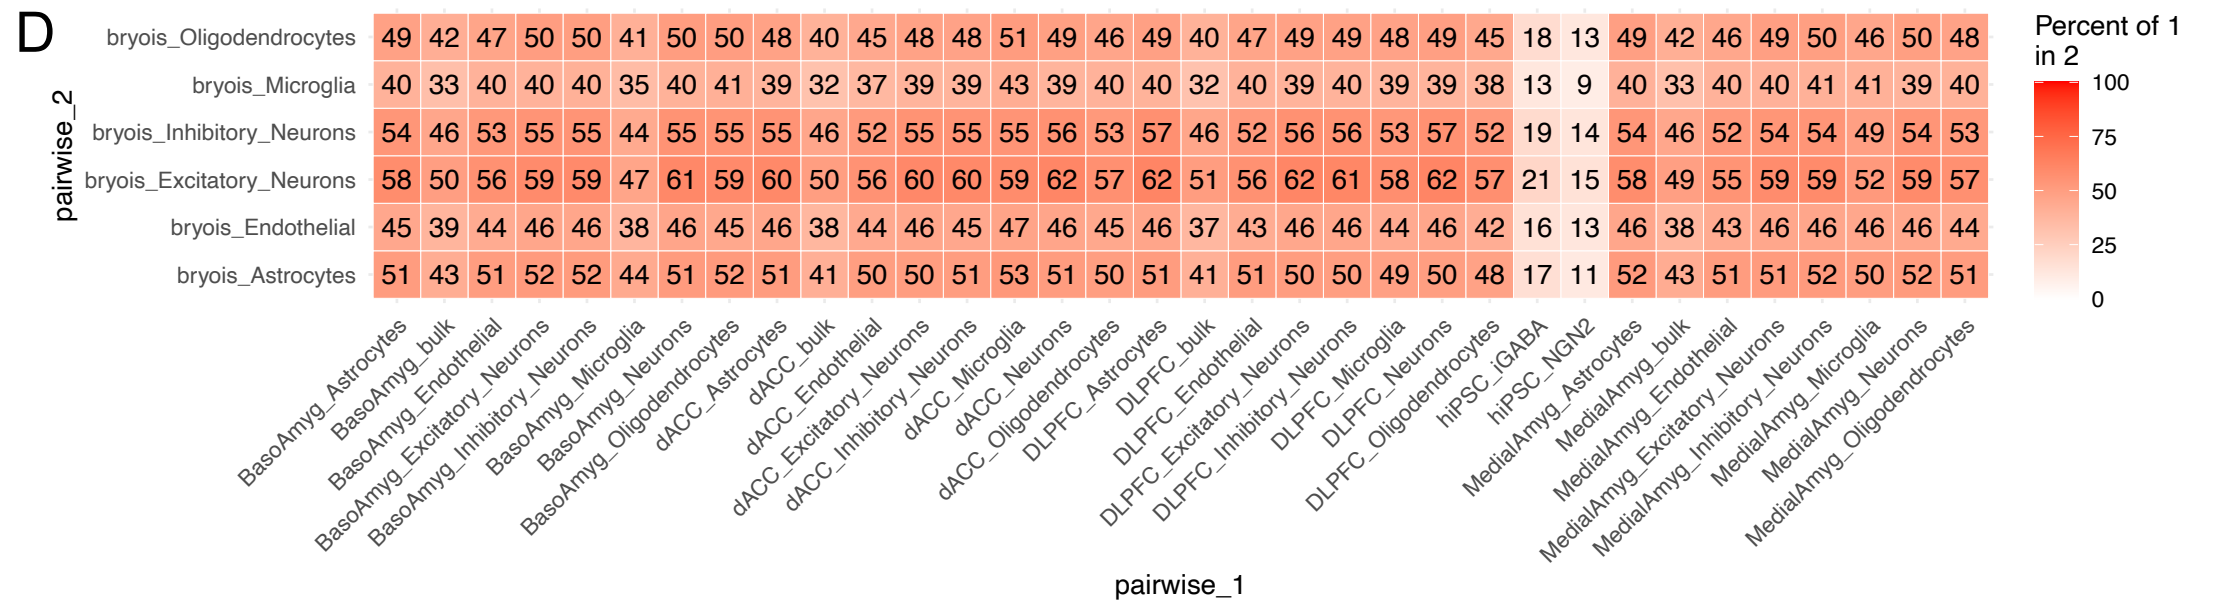



Figure S4

A

Batch 1

Batch 2

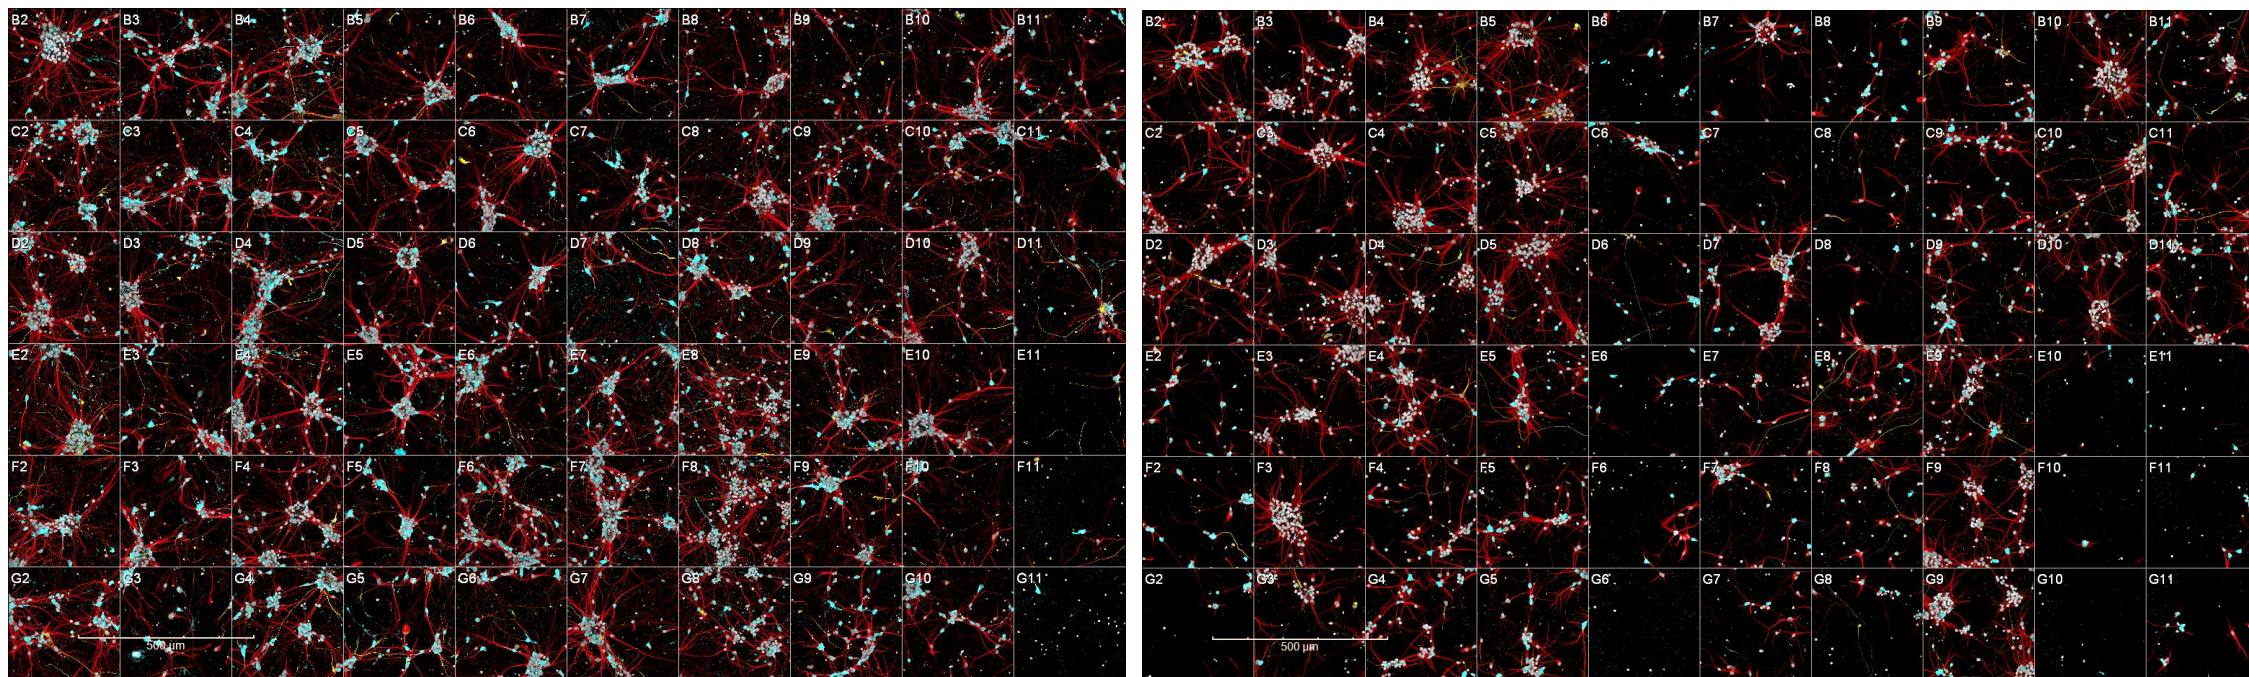

Batch 3

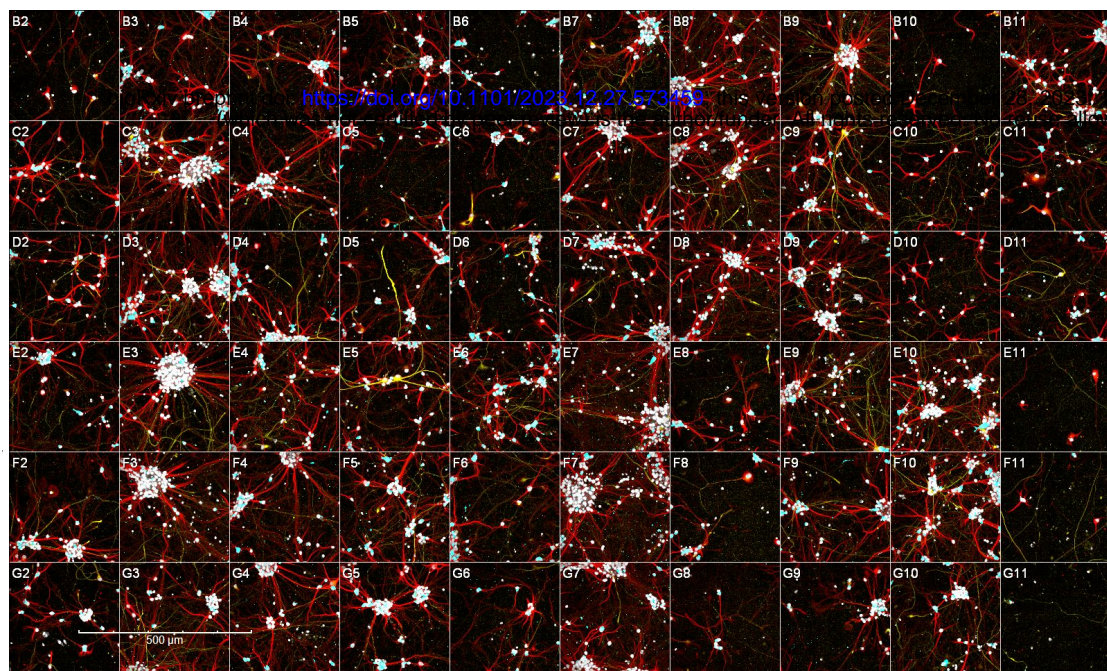

B

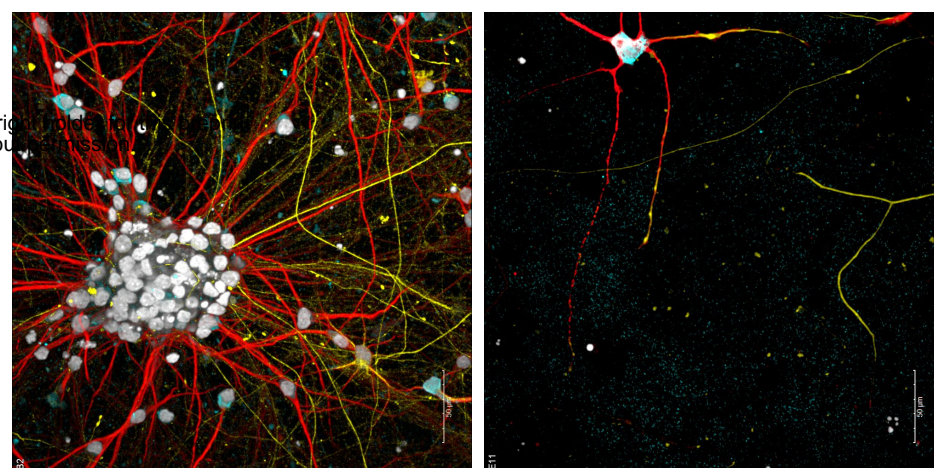

GABA  
NESTIN  
MAP2  
HOECHST

C

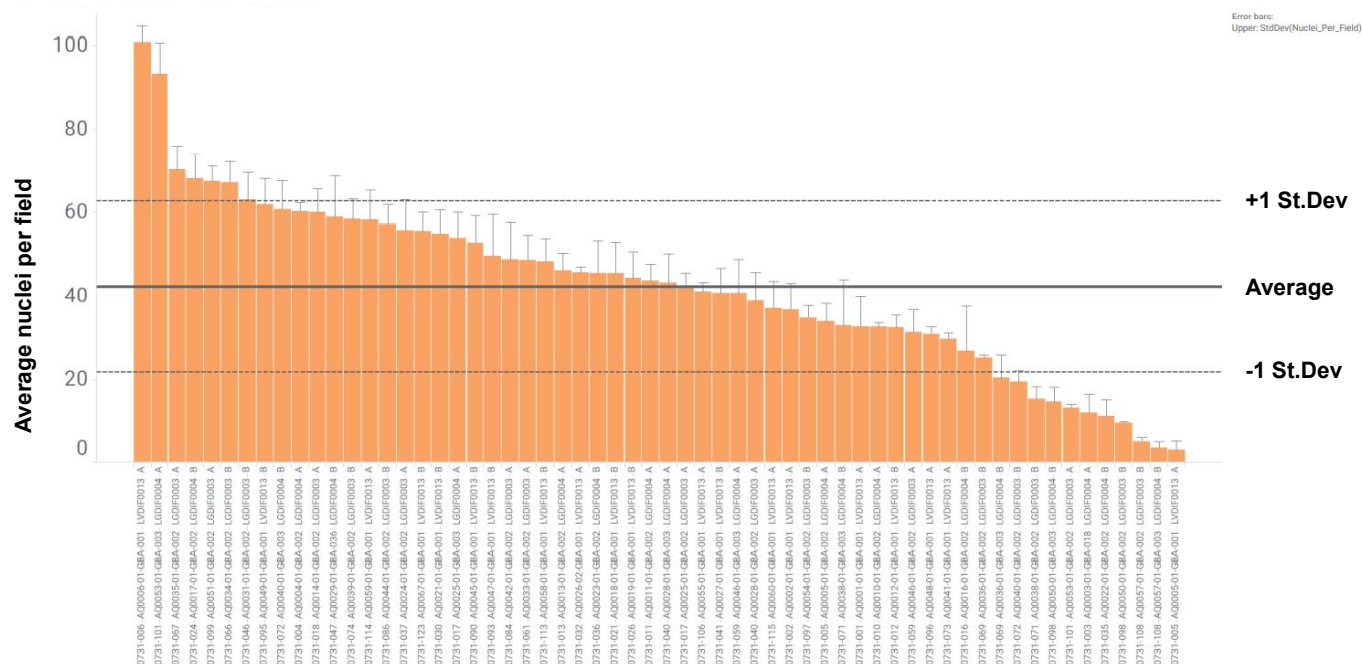

D

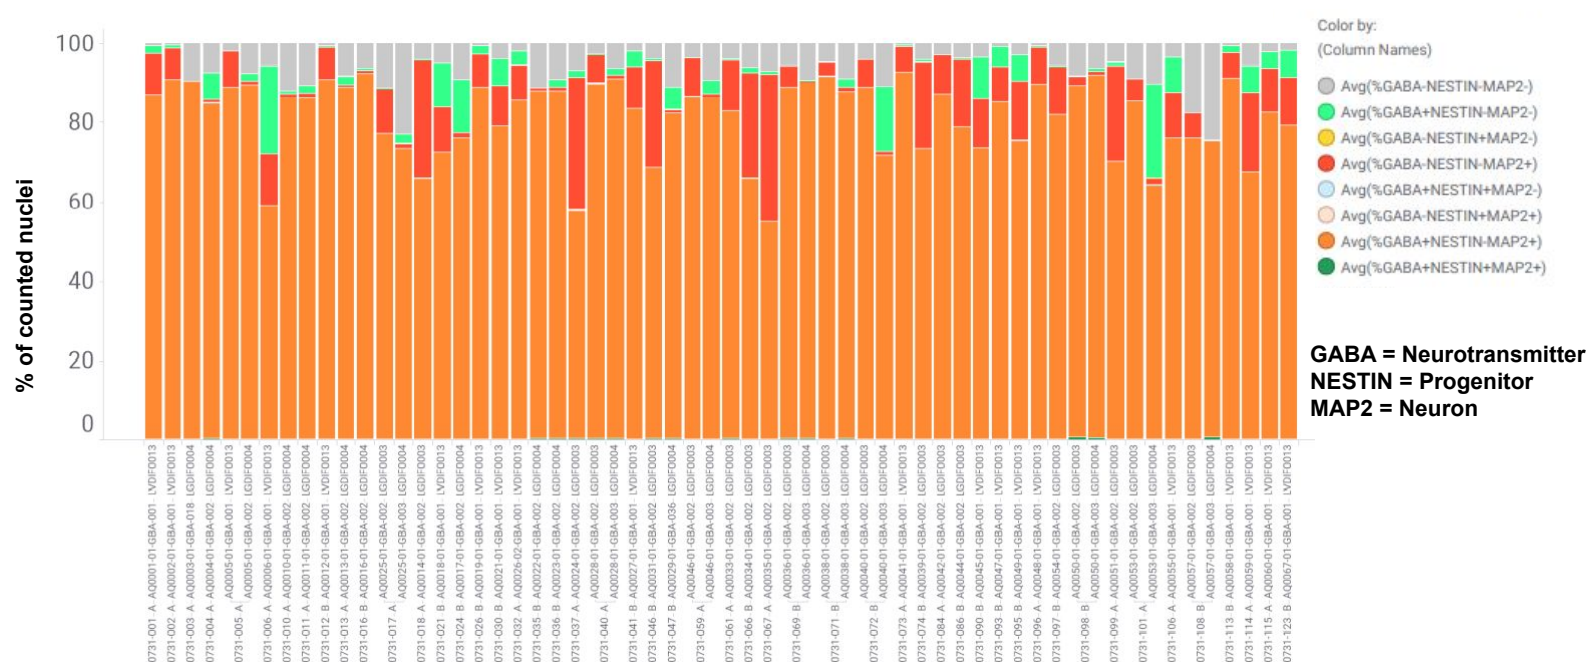

hiPSC-derived GABAergic neurons. (A) Labeled montage of a single 40x field per well. (B) High (AQ0045) and low (AQ0005) density examples enlarged. (C) Cell count per field per individual, (D) GABA, Progenitor, and Neuron percent per well per individual



**Figure S5**

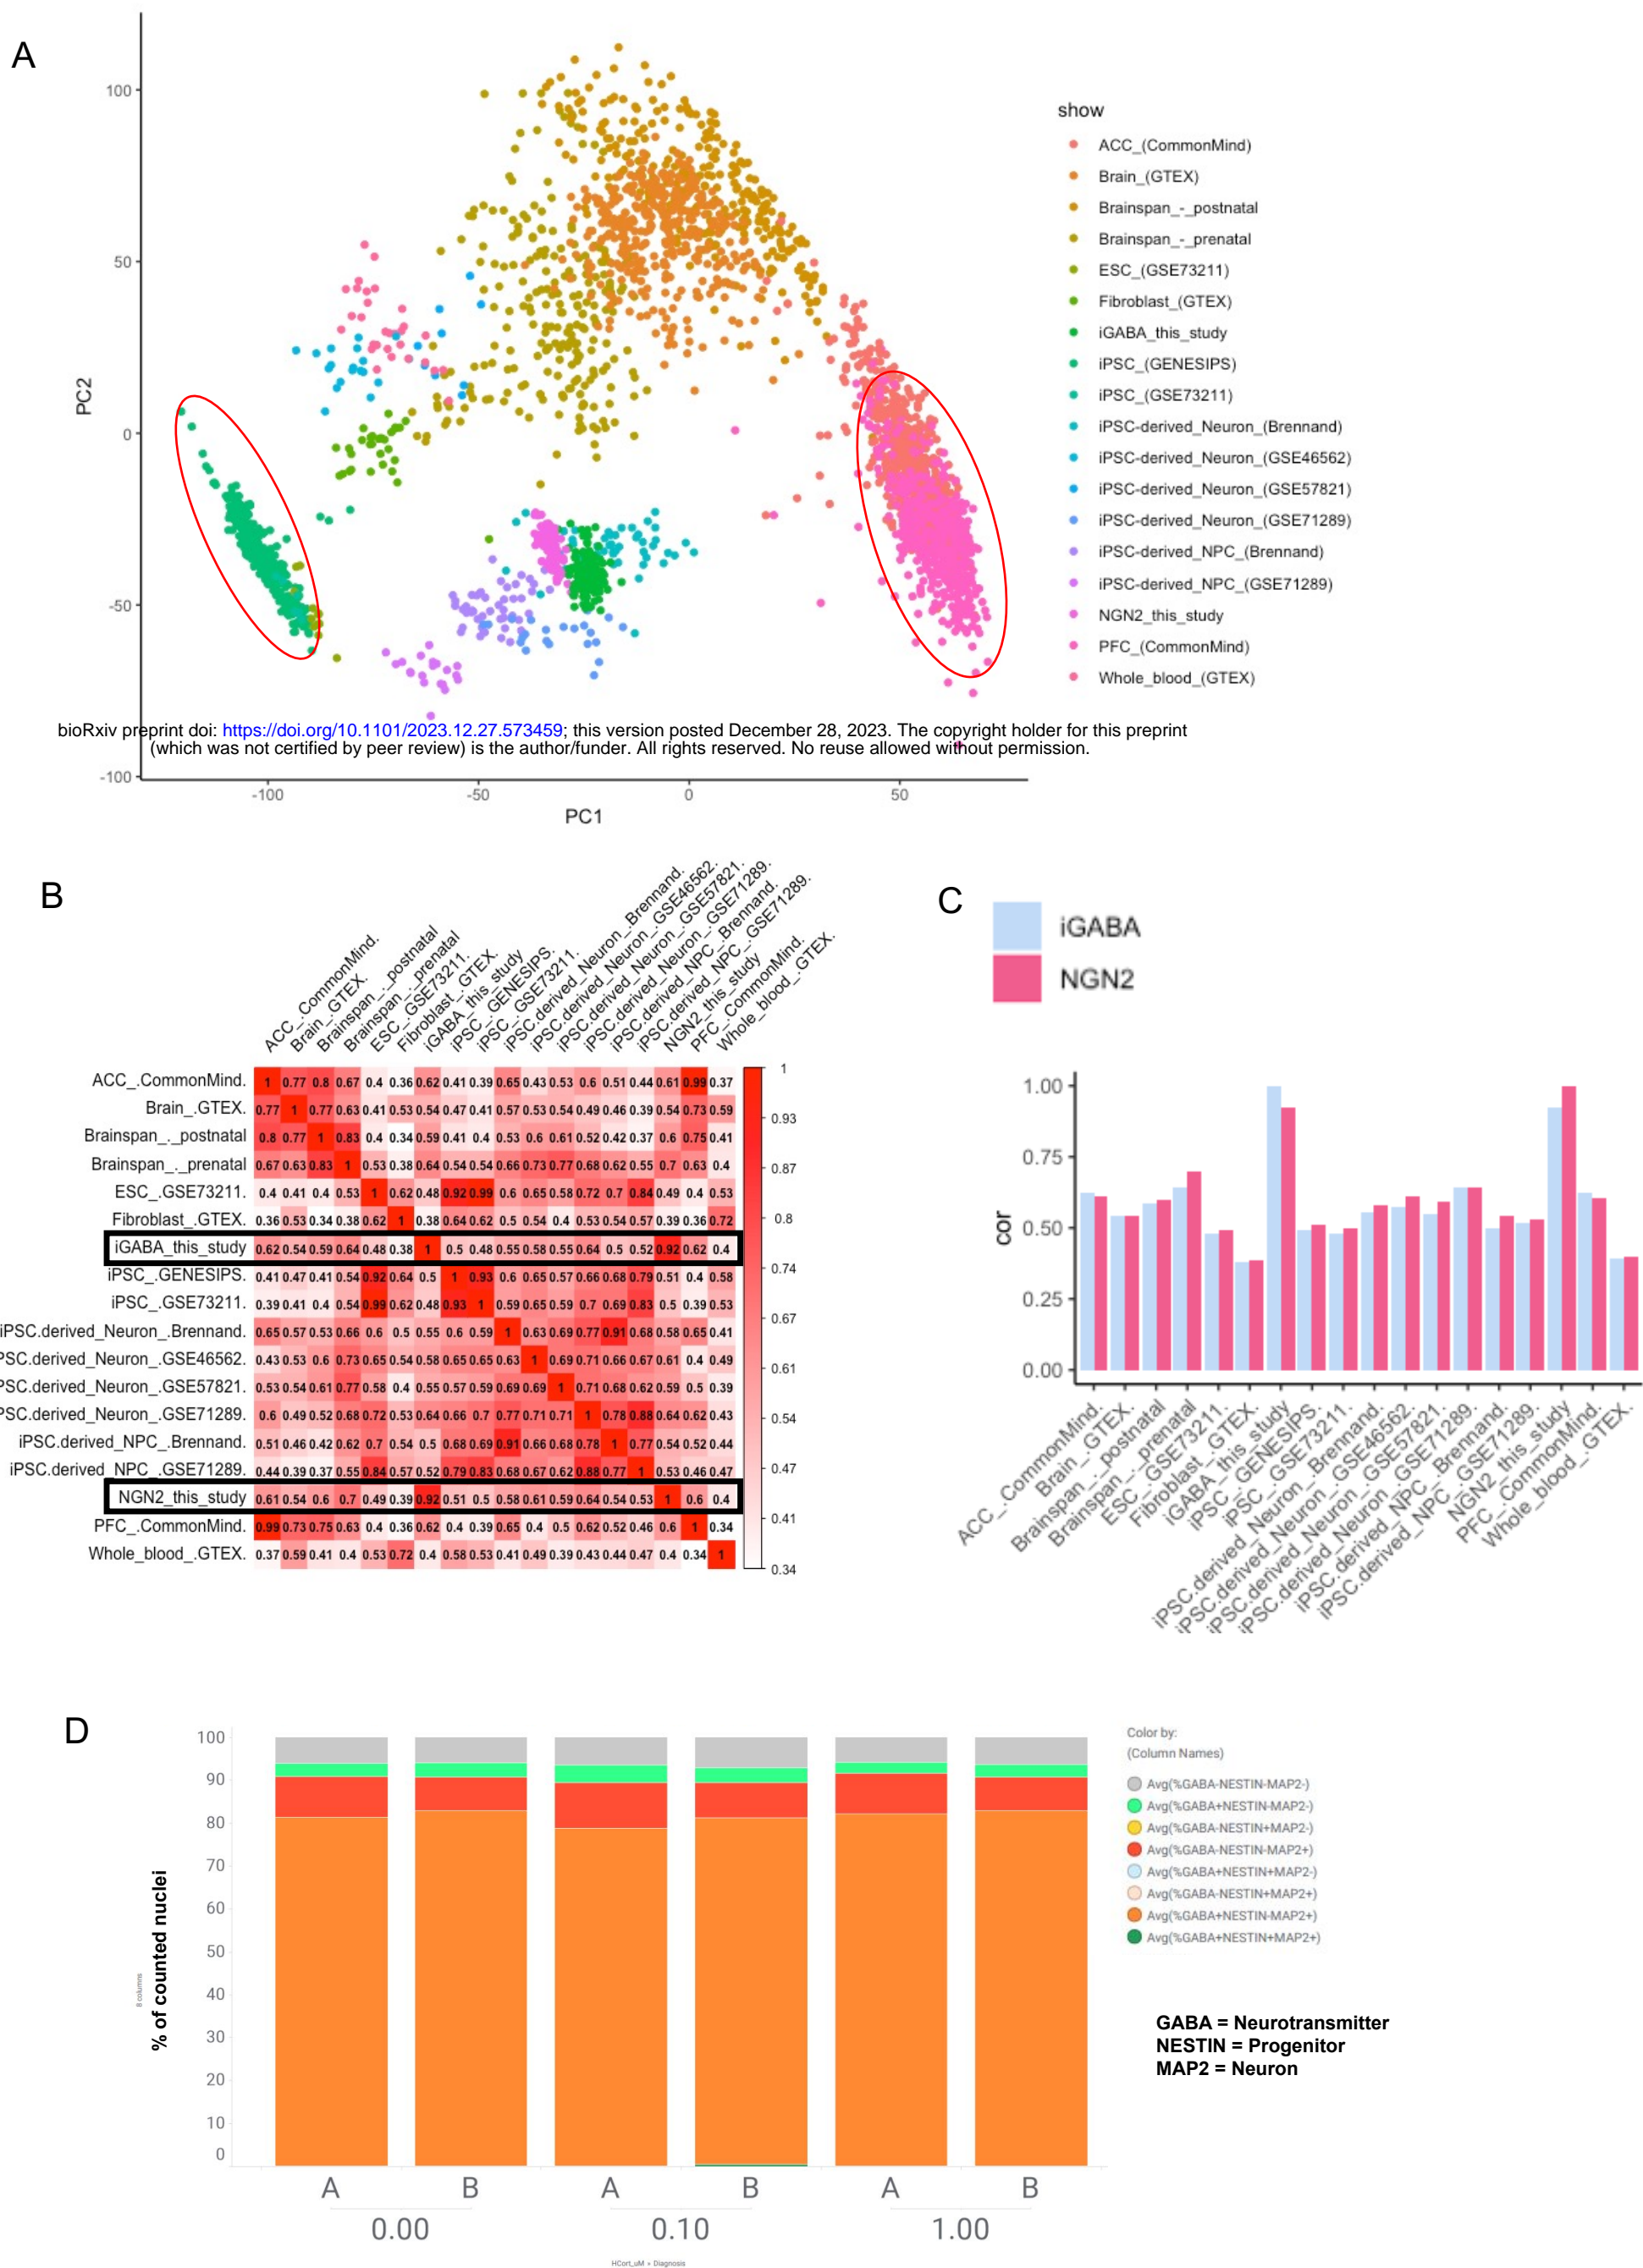

**Developmental specificity of hiPSC-derived GABAergic neurons.** (A) PCA of GABAergic expression data compared to previous hiPSC-derived neuronal studies, including the excitatory neuron study used here. (B) Pairwise correlation between expression signatures of iGABA and iGLUT neurons from our study with cell types across 16 independent studies. (C) Correlation between expression signatures of iGABA and iGLUT neurons from our study with other hiPSC studies. (D) Proportion of GABA+, NESTIN+, and MAP2+ cells are stable across Hcort dosages.



**Figure S6**

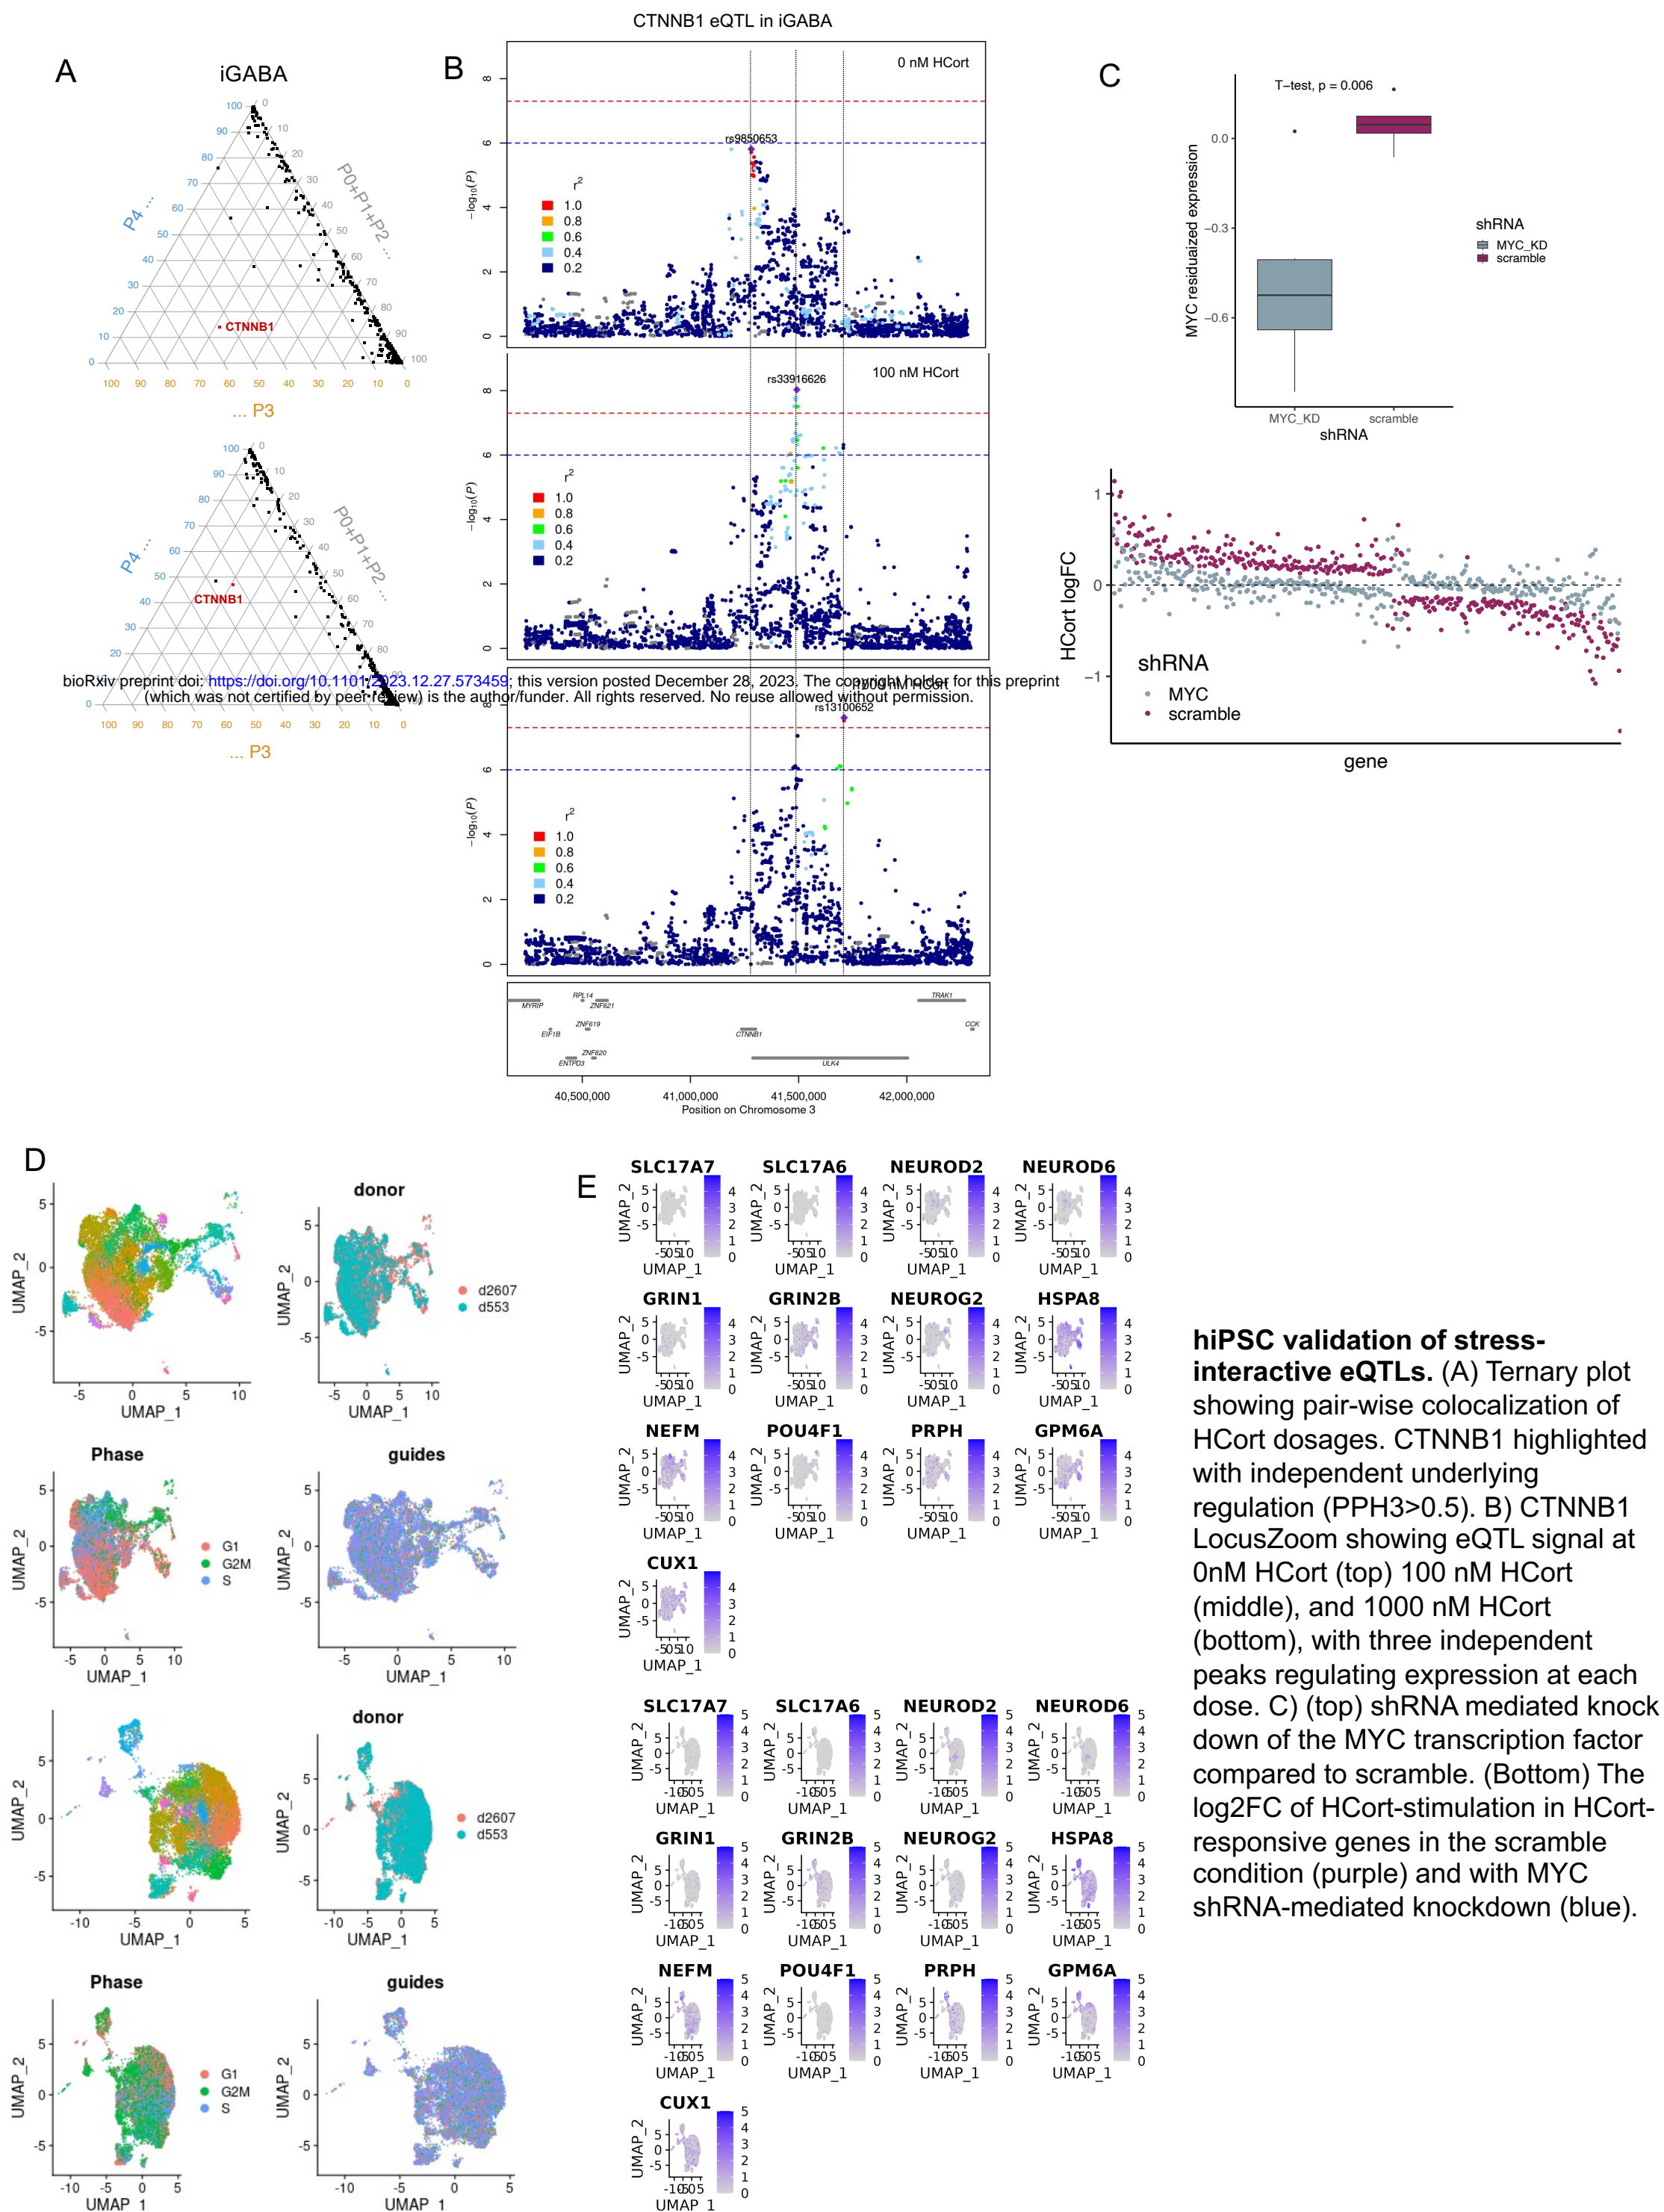

# Figure S7

## BLA base

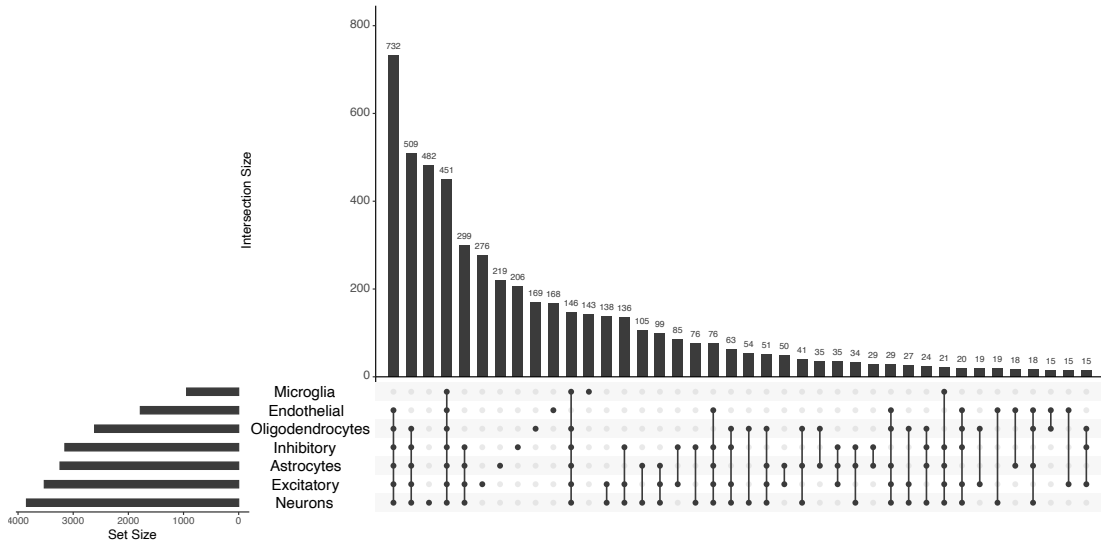

## BLA stress interactive

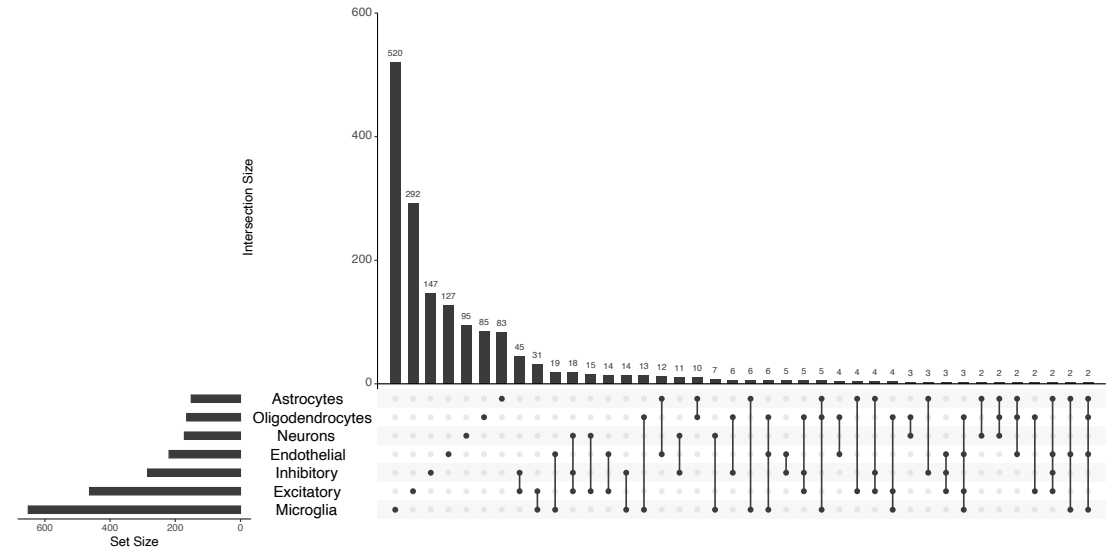

## dACC base

bioRxiv preprint doi: <https://doi.org/10.1101/2023.12.27.573459>; this version posted December 28, 2023. The copyright holder for this preprint (which was not certified by peer review) is the author/funder. All rights reserved. No reuse allowed without permission.

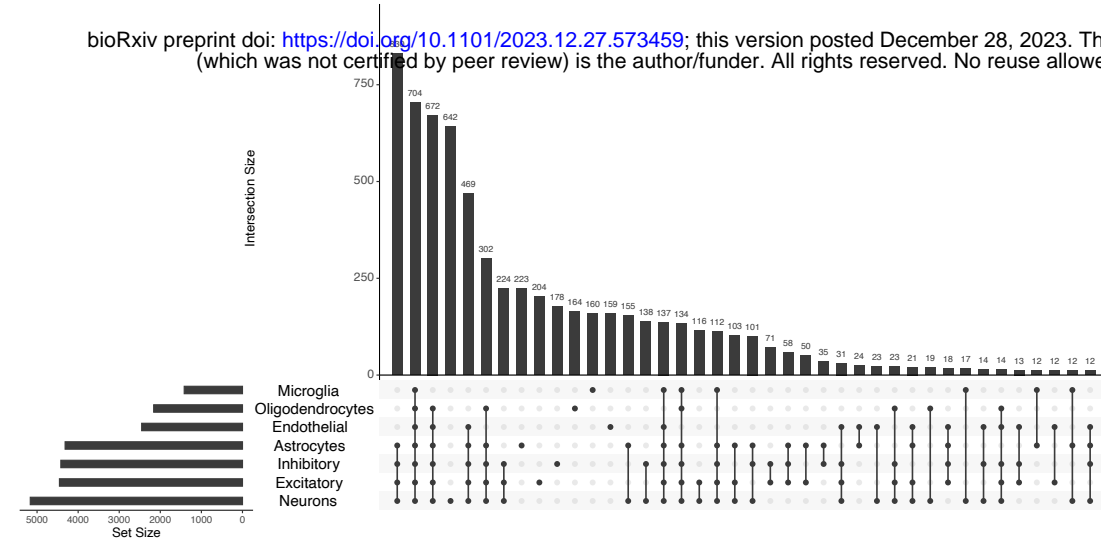

## dACC stress interactive

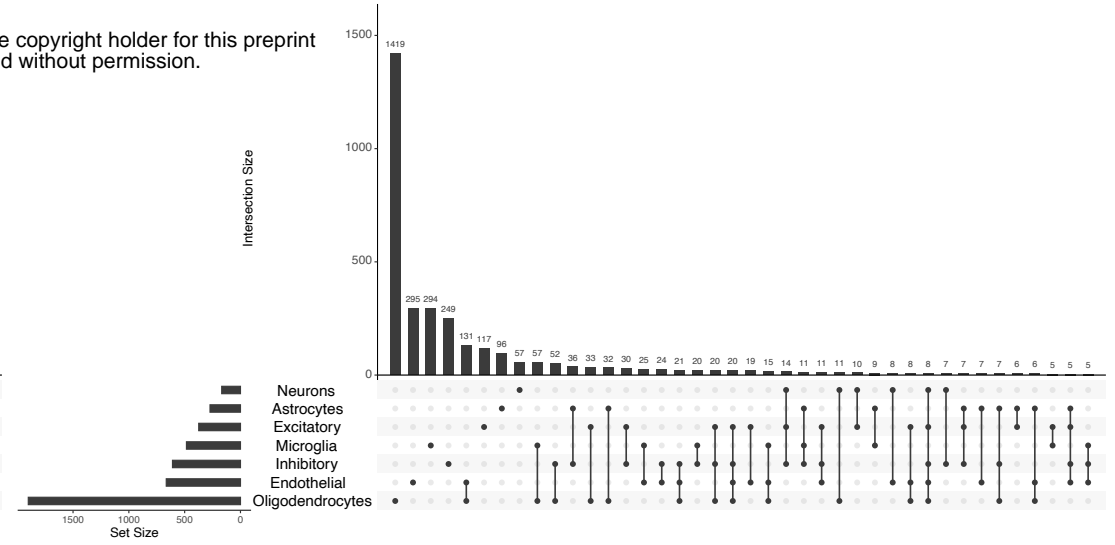

## DLPFC base

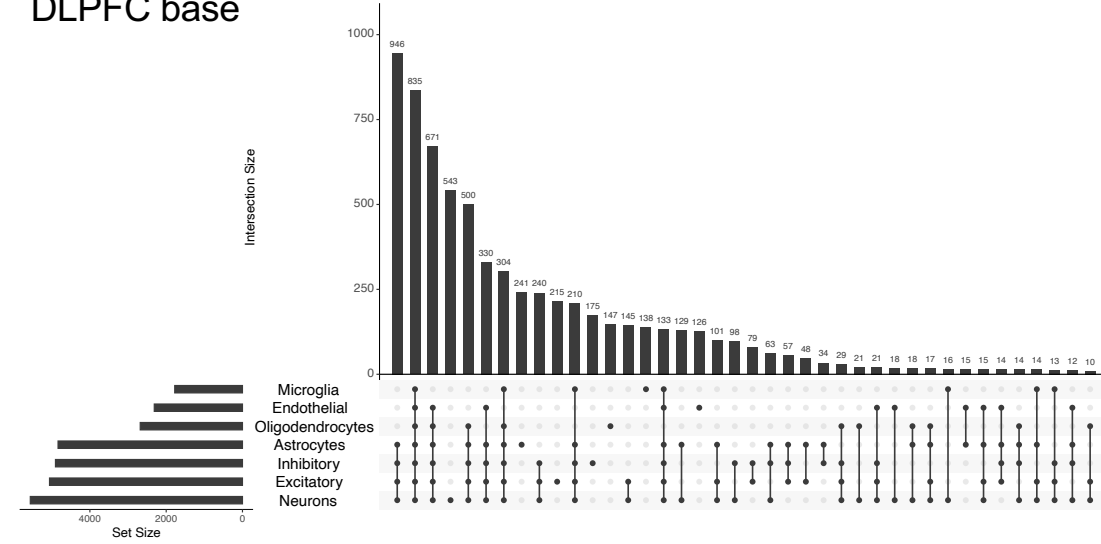

## DLPFC stress interactive

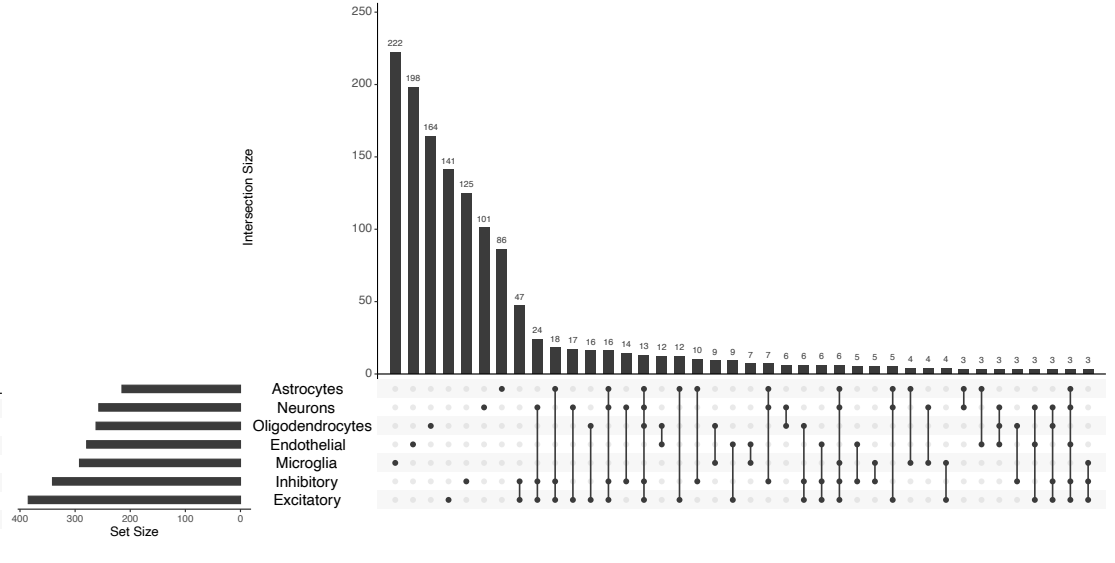

## MeA base

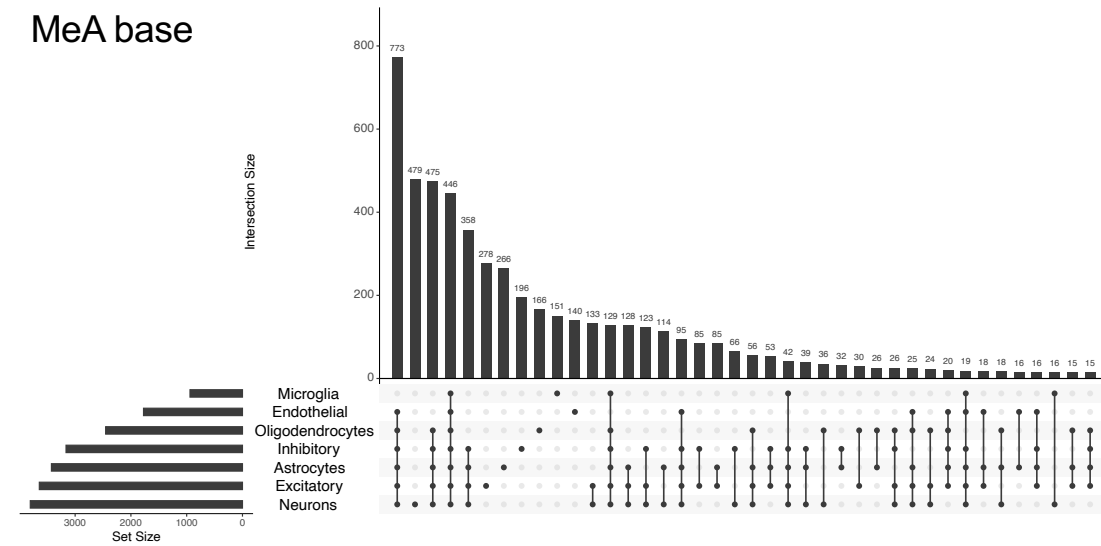

## MeA stress interactive

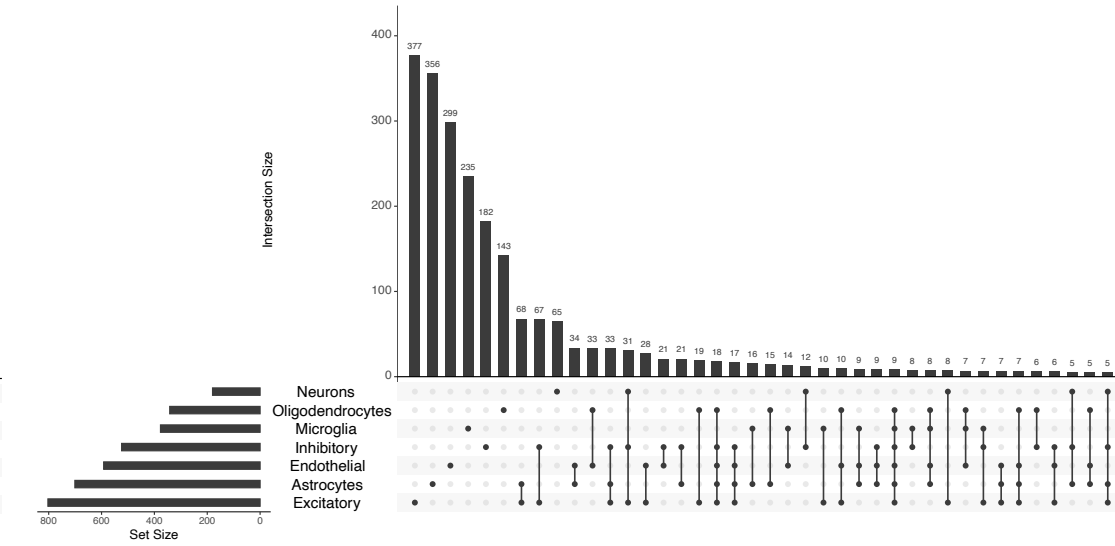

**Overlap of cell type imputed eQTLs across the post-mortem brain.** UpSet plots indicating overlap of eGenes detected across imputed cell types for base eGenes and stress-interactive eGenes across post mortem brain regions.

**Figure S8****A Base models**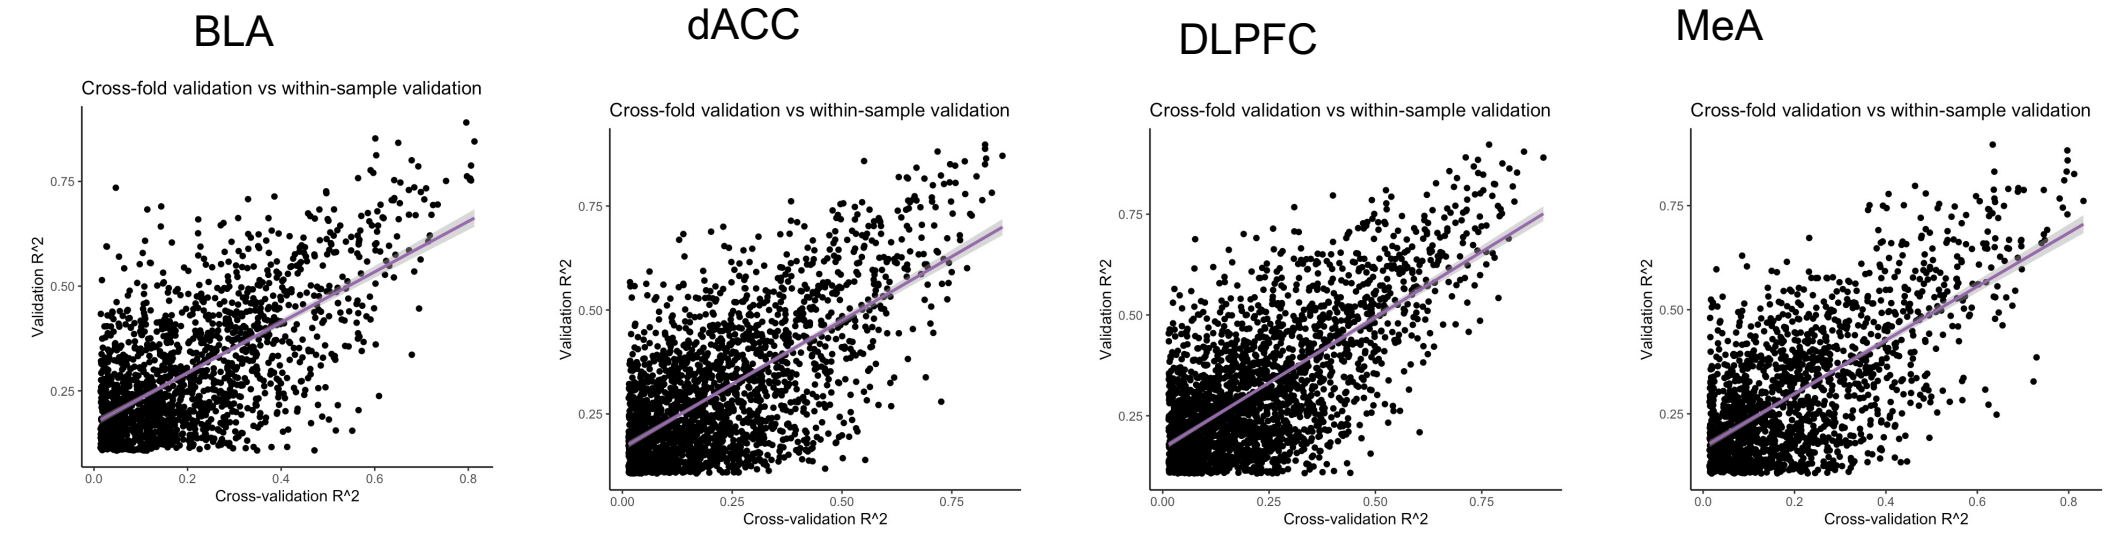**Stress-interactive models**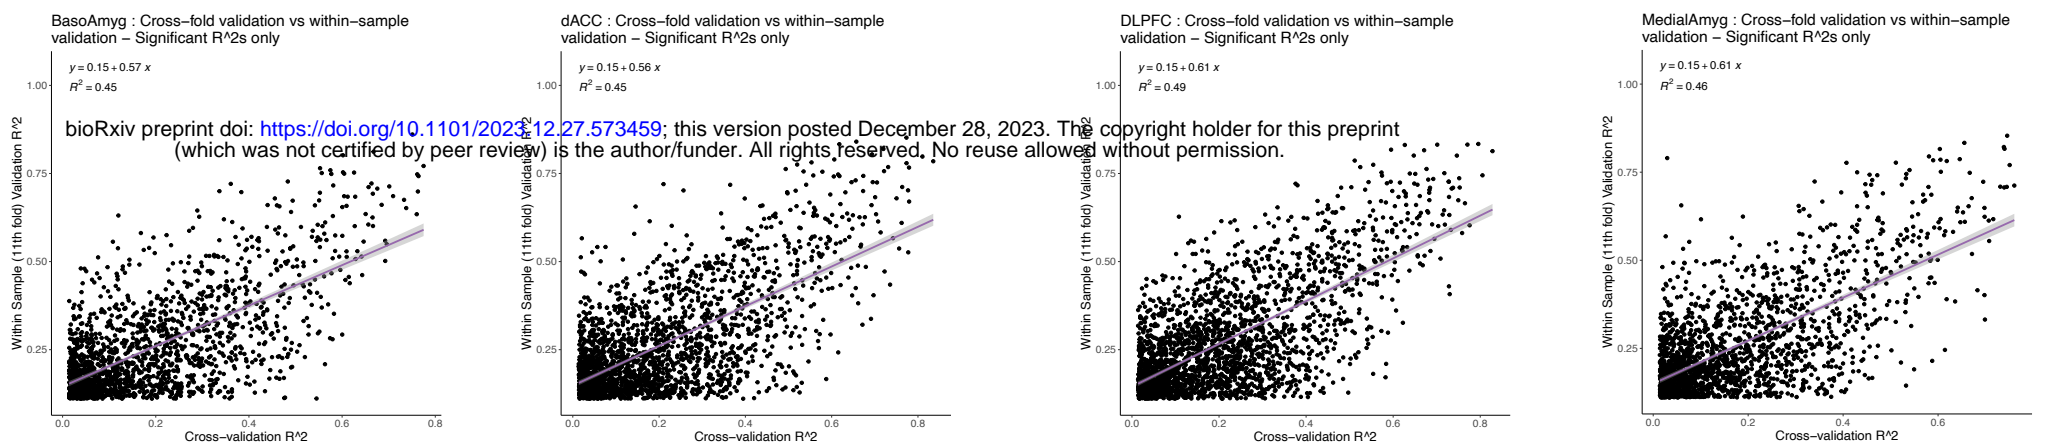**B**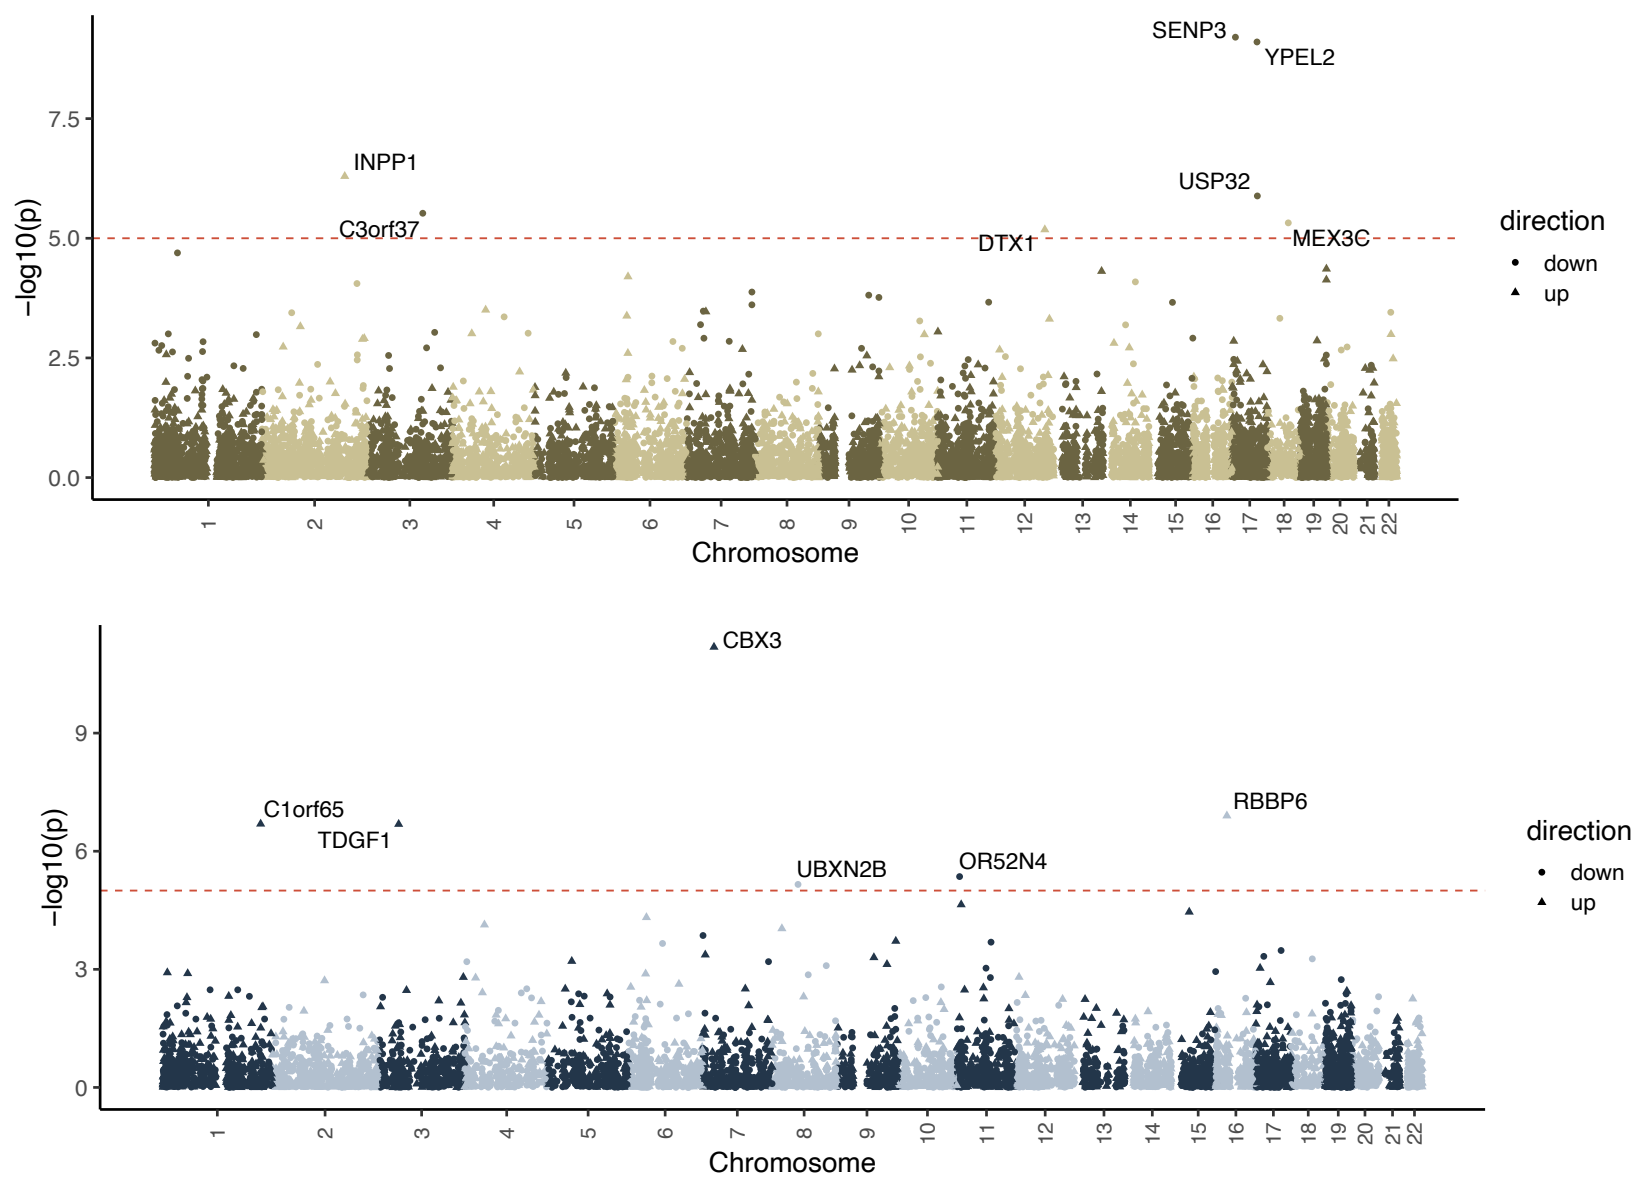

**Application of transcriptomic imputation models.** A) Cross fold validation  $R^2$  compared to hold-out fold validation  $R^2$  for each significantly predicted gene by base transcriptomic imputation (above) and stress-interactive transcriptomic imputation models (below). B) Manhattan plot showing transcriptome-wide association results of imputed differential expression by the base (top) and stress-interactive (bottom) model as applied to Alzheimer's disease. Red dotted line indicates genome-wide significance.
